# Supplementary material for: Correlation Analysis of Variables From the Atherosclerosis Risk in Communities Study
Source: Front Pharmacol. 2022 Jul 11;13:883433. doi: 10.3389/fphar.2022.883433 (PMC9310100; doi:10.3389/fphar.2022.883433)
Supplement: Supplementary file 1 [file Table2.XLSX]

## Sheet: 0.08
Cluster Name	Clustering threshold	Cluster Number	Cluster Group
cardiovascular health history (heart attack/stroke/coronary heart disease)	0.08	0	0
diet	0.08	376	0
medication (heart rhythm)	0.08	186	0
medication (prescription)	0.08	183	0
health history (thryoid)	0.08	174	0
health history (stiffness/pain)	0.08	171	0
health history (stiffness/pain)	0.08	170	0
medication (cholesterol lowering)	0.08	70	0
health history (arthritis)	0.08	168	0
cardiovascular health history (congestive heart failure)	0.08	72	0
cardiovascular health history (congestive heart failure)	0.08	73	0
diet (dietary supplements)	0.08	382	0
physical ability	0.08	166	0
physical ability	0.08	164	0
general physical/mental health	0.08	163	0
medication	0.08	94	0
physical ability	0.08	162	0
medication (heart medication)	0.08	398	0
medication	0.08	161	0
health history (chest pain)	0.08	384	0
medication	0.08	127	0
metabolic panel results	0.08	119	0
diet/nutrient level measurements	0.08	118	0
diet/nutrient level measurements	0.08	117	0
diet/nutrient level measurements	0.08	116	0
medication (cholesterol lowering)	0.08	112	0
health history (edema)	0.08	392	0
diet (vitamin E)	0.08	108	0
diet (dietary supplements)	0.08	109	0
medication	0.08	194	0
nutrient measurements	0.08	111	0
medication	0.08	202	0
medication (calcium channel blocker)	0.08	294	0
health history (nightime urination)	0.08	332	0
health history (stiffness/swelling/pain)	0.08	267	0
health history (stiffness/swelling/pain)	0.08	259	0
lung health history (breathlessness)	0.08	258	0
health history (atrial fibrillation)	0.08	12	0
diet	0.08	17	0
health history (sinuses)	0.08	250	0
health history (cardiac surgery)	0.08	249	0
lung health history (wheezing)	0.08	248	0
health history (arthritis)	0.08	238	0
health history (vasectomy)	0.08	234	0
blood lipid levels (LDL, Apolipoprotein, total cholesterol)	0.08	29	0
medication (heart medication)	0.08	339	0
medication	0.08	30	0
carotid ultrasound measurements (right carotid)	0.08	233	1
carotid ultrasound measurements (right common carotid, wall width)	0.08	193	1
ultrasound results	0.08	273	1
carotid ultrasound measurements (left common carotid, wall width)	0.08	192	1
diet	0.08	213	1
carotid ultrasound measurements (left common carotid)	0.08	190	1
hematology results (WBC count)	0.08	215	1
carotid ultrasound measurements (far wall)	0.08	216	1
carotid ultrasound measurements	0.08	256	1
cardiac ultrasound measurements (left atrium)	0.08	334	1
cardiac ultrasound measurements (aorta)	0.08	336	1
diet (baking)	0.08	185	1
carotid ultrasound measurements (right common carotid)	0.08	184	1
carotid ultrasound measurements	0.08	219	1
hematology results (platelet count)	0.08	176	1
ultrasound measurements (near wall)	0.08	287	1
artery ultrasound measurements	0.08	246	1
artery ultrasound measurements	0.08	372	1
carotid ultrasound measurements (near wall)	0.08	230	1
carotid ultrasound results (far wall measurements, plaque)	0.08	231	1
carotid ultrasound measurements (near wall)	0.08	251	1
carotid ultrasound measurements (left/right internal carotid)	0.08	191	1
cardiac ultrasound measurements (left ventricular)	0.08	284	1
blood pressure measurements (sitting)	0.08	106	1
cardiac health history (murmur)	0.08	23	1
kidney function measurements (creatine, urea, dialysis)	0.08	26	1
blood lipid levels (HDL, Apolipoprotein)	0.08	28	1
carotid ultrasound results	0.08	45	1
blood pressure measurements (brachial)	0.08	47	1
blood pressure measurements (ankle brachial)	0.08	49	1
cardiocascular health history (perpheral artery disease)	0.08	50	1
cornell voltage measurements	0.08	53	1
blood pressure measurements (sitting/diastolic)	0.08	57	1
carotid ultrasound measurements (near wall)	0.08	412	1
ultrasound results	0.08	408	1
smoking history (cigar/cigarello)	0.08	6	1
carotid distensibility measurements	0.08	95	1
kidney function measurements (uric acid measurements)	0.08	97	1
blood pressure measurements (sitting/diastolic)	0.08	58	1
ultrasound results	0.08	396	1
carotid ultrasound results (plaque shadow)	0.08	101	1
cardiovascular health history (cardiovascular disease)	0.08	1	1
cardiac ultrasound results (cardiac measurements)	0.08	103	1
diet	0.08	387	2
drinking history	0.08	8	2
health history (pregnancy)	0.08	223	2
diet/nutrient level measurements	0.08	34	2
health history (vasectomy)	0.08	217	2
drinking history	0.08	46	2
drinking history	0.08	333	2
hematology results	0.08	261	2
medication (birth control)	0.08	200	2
exercise/physical acivity	0.08	120	2
diet	0.08	388	2
exercise/physical acivity	0.08	11	2
hematology results (WBC count)	0.08	226	2
diet/nutrient level measurements	0.08	33	2
smoking history (years not smoked)	0.08	195	2
diet/nutrient level measurements	0.08	32	2
health history (hair loss)	0.08	232	2
demographics (household occupants)	0.08	115	2
drinking history	0.08	236	2
diet	0.08	25	2
smoking history (inhale)	0.08	254	2
smoking history (cig/day)	0.08	343	2
lung health history (asthma)	0.08	14	2
lung health history (cough/wheezing)	0.08	341	2
diet	0.08	389	2
lung health history (emphysema)	0.08	16	2
lung health history (cough/duration)	0.08	338	2
lung health history (bronchitis)	0.08	20	2
lung health history (cough)	0.08	13	2
diet (broccoli)	0.08	121	2
diet (sugar)	0.08	374	2
demographics (marital status)	0.08	177	2
diet	0.08	386	2
diet (wine)	0.08	385	2
diet (visible fat on meat)	0.08	126	2
demographics (marital status/living situation)	0.08	323	2
smoking history (general)	0.08	3	2
drinking history	0.08	331	2
health history (dental)	0.08	169	2
lung health history (lung disease)	0.08	67	2
diet (tea)	0.08	125	2
diet	0.08	381	2
diet	0.08	380	2
drinking history	0.08	270	2
diet	0.08	379	2
demographics (occupation/education)	0.08	7	2
exercise/physical activity (work-related)	0.08	179	2
exercise/physical activity	0.08	18	2
diet	0.08	377	2
diet	0.08	378	2
diet (white bread)	0.08	122	2
smoking history (secondhand smoke exposure)	0.08	182	2
smoking history (nicotine use)	0.08	180	2
diet (biscuits)	0.08	123	2
diet (diet soft drinks)	0.08	124	2
family health history (diabetes)	0.08	51	3
maternal health history	0.08	15	3
maternal health history (heart attack)	0.08	218	3
maternal health history (stroke)	0.08	54	3
maternal health history (age at death)	0.08	220	3
maternal health history (high blood pressure)	0.08	222	3
maternal health history (high blood pressure)	0.08	214	3
maternal health history (heart disease)	0.08	55	3
family health history (blood pressure)	0.08	159	4
paternal health history (stroke)	0.08	98	4
paternal health history (cancer)	0.08	264	4
paternal health history (heart attack)	0.08	262	4
paternal health history	0.08	19	4
paternal health history (stroke)	0.08	263	4
paternal health history (coronary heart disease/heart attack)	0.08	102	4
paternal health history (age at death)	0.08	265	4
paternal health history (high blood pressure)	0.08	266	4
ultrasound results	0.08	318	5
drinking history	0.08	330	5
ultrasound results	0.08	316	5
health history (hormone use)	0.08	353	5
health history (dental)	0.08	340	5
health history (hormone use)	0.08	397	5
health history (hormone use)	0.08	399	5
health history (hormone use)	0.08	400	5
health history (hormone use)	0.08	401	5
Biomarker measurements	0.08	402	5
medication	0.08	403	5
health history (stroke)	0.08	404	5
health history (head injury)	0.08	405	5
medication (aspirin)	0.08	406	5
ultrasound results	0.08	407	5
cardiac ultrasound measurements (output)	0.08	413	5
ultrasound results	0.08	409	5
health history (edema)	0.08	375	5
health history (gallbladder)	0.08	373	5
health history (stroke)	0.08	390	5
health history (hormone use)	0.08	352	5
health history (glaucoma)	0.08	351	5
health history (laser treatment)	0.08	350	5
medication	0.08	347	5
Biomarker measurements	0.08	346	5
Biomarker measurements	0.08	345	5
health history (head injury)	0.08	342	5
medication	0.08	411	5
diet/nutrient level measurements (fish/omega3)	0.08	383	5
medication (birth control)	0.08	199	5
ultrasound results	0.08	280	5
cardiac health history (murmur)	0.08	22	5
skinfold measurement (Sub caps)	0.08	60	5
skinfold measurement (triceps)	0.08	61	5
health history (female reproductive system/hormone use)	0.08	62	5
health history (cancer)	0.08	71	5
cardiac measurements (heart rate, blood flow measurements )	0.08	75	5
carotid distensibility measurements	0.08	96	5
health history (gallbladder)	0.08	172	5
health history (hepatitis)	0.08	173	5
ultrasound results	0.08	282	5
health history (cataracts)	0.08	181	5
medication (birth control)	0.08	197	5
medication (birth control)	0.08	198	5
health history (cancer)	0.08	415	5
blood pressure measurements (ankle brachial)	0.08	240	5
diet (dietary supplements)	0.08	416	5
ultrasound results	0.08	279	5
medication (hormone usage)	0.08	271	5
ultrasound results	0.08	278	5
medication (hormone usage)	0.08	272	5
ultrasound results	0.08	277	5
ultrasound results	0.08	276	5
health history (cardiac tests)	0.08	260	5
health history (chest pain)	0.08	244	5
health history (cardiac procedures)	0.08	245	5
NS	0.08	253	5
blood pressure measurements	0.08	252	5
ultrasound results	0.08	274	5
health history (cardiac procedures)	0.08	247	5
health history (stroke/paralysis)	0.08	113	6
health history (stroke/paralysis)	0.08	64	6
health history (stroke/paralysis)	0.08	160	6
health history (stroke)	0.08	59	6
health history (stroke)	0.08	107	6
health history (stroke)	0.08	157	6
paternal health history (diabetes)	0.08	63	7
demographics (number of siblings)	0.08	100	8
family health history (stroke)	0.08	239	8
demographics (parental education)	0.08	410	8
demographics (siblings)	0.08	66	8
health history (stroke)	0.08	132	8
family health history (stroke)	0.08	187	8
family health history (stroke)	0.08	224	8
family health history (age at death)	0.08	208	8
family health history (heart attack)	0.08	207	8
family health history (stroke)	0.08	204	8
family health history (age at death)	0.08	243	8
family health history (age at death)	0.08	189	8
family health history (heart attack)	0.08	188	8
family health history (heart attack)	0.08	241	8
demographics (parental education)	0.08	167	8
family health history (age at death)	0.08	153	8
family health history (heart attack)	0.08	152	8
family health history (heart attack)	0.08	225	8
family health history (age at death)	0.08	229	8
mental well-being (life satisfaction)	0.08	84	9
mental well-being (anger)	0.08	86	9
mental well-being (anger)	0.08	90	9
mental well-being (intrapersonal support)	0.08	93	9
mental well-being (anger)	0.08	165	9
mental well-being (intrapersonal support)	0.08	104	9
diet	0.08	110	10
health history (polyp in colon)	0.08	175	11

## Sheet: 0.09
Cluster Name	Clustering threshold	Cluster Number	Cluster Group
cardiovascular health history (heart attack/stroke/coronary heart disease)	0.09	0	0
physical ability	0.09	162	0
diet (vitamin E)	0.09	108	0
medication	0.09	161	0
medication	0.09	202	0
health history (stiffness/swelling/pain)	0.09	259	0
lung health history (breathlessness)	0.09	258	0
medication	0.09	127	0
lung health history (lung disease)	0.09	67	0
medication (cholesterol lowering)	0.09	70	0
cardiovascular health history (congestive heart failure)	0.09	72	0
cardiovascular health history (congestive heart failure)	0.09	73	0
general physical/mental health	0.09	163	0
health history (sinuses)	0.09	250	0
lung health history (wheezing)	0.09	248	0
diet/nutrient level measurements	0.09	118	0
diet/nutrient level measurements	0.09	117	0
medication	0.09	94	0
diet/nutrient level measurements	0.09	116	0
Biomarker measurements	0.09	346	0
medication (cholesterol lowering)	0.09	112	0
nutrient measurements	0.09	111	0
medication (heart medication)	0.09	398	0
health history (arthritis)	0.09	238	0
diet (dietary supplements)	0.09	109	0
health history (cardiac surgery)	0.09	249	0
physical ability	0.09	164	0
health history (stiffness/swelling/pain)	0.09	267	0
health history (arthritis)	0.09	168	0
diet	0.09	17	0
lung health history (asthma)	0.09	14	0
health history (thryoid)	0.09	174	0
lung health history (bronchitis)	0.09	20	0
lung health history (cough)	0.09	13	0
physical ability	0.09	166	0
diet (dietary supplements)	0.09	382	0
health history (atrial fibrillation)	0.09	12	0
lung health history (emphysema)	0.09	16	0
diet	0.09	376	0
lung health history (cough/duration)	0.09	338	0
health history (stiffness/pain)	0.09	170	0
medication (heart rhythm)	0.09	186	0
medication (calcium channel blocker)	0.09	294	0
medication (prescription)	0.09	183	0
blood lipid levels (LDL, Apolipoprotein, total cholesterol)	0.09	29	0
medication	0.09	30	0
medication (heart medication)	0.09	339	0
medication	0.09	194	0
lung health history (cough/wheezing)	0.09	341	0
health history (stiffness/pain)	0.09	171	0
health history (nightime urination)	0.09	332	0
carotid ultrasound measurements (left common carotid)	0.09	190	1
carotid ultrasound measurements (left/right internal carotid)	0.09	191	1
carotid ultrasound measurements (right common carotid, wall width)	0.09	193	1
carotid ultrasound measurements (right carotid)	0.09	233	1
carotid ultrasound results (far wall measurements, plaque)	0.09	231	1
carotid ultrasound measurements (near wall)	0.09	230	1
carotid ultrasound measurements	0.09	219	1
carotid ultrasound measurements (far wall)	0.09	216	1
hematology results (WBC count)	0.09	215	1
diet	0.09	213	1
artery ultrasound measurements	0.09	372	1
carotid ultrasound measurements (left common carotid, wall width)	0.09	192	1
ultrasound results	0.09	396	1
kidney function measurements (uric acid measurements)	0.09	97	1
diet (baking)	0.09	185	1
blood lipid levels (HDL, Apolipoprotein)	0.09	28	1
kidney function measurements (creatine, urea, dialysis)	0.09	26	1
blood pressure measurements (sitting/diastolic)	0.09	57	1
blood pressure measurements (sitting/diastolic)	0.09	58	1
carotid ultrasound measurements	0.09	256	1
ultrasound results	0.09	408	1
carotid ultrasound measurements (near wall)	0.09	412	1
cardiac ultrasound measurements (aorta)	0.09	336	1
cardiac ultrasound measurements (left atrium)	0.09	334	1
carotid ultrasound results	0.09	45	1
cardiocascular health history (perpheral artery disease)	0.09	50	1
ultrasound results	0.09	273	1
cardiac ultrasound measurements (left ventricular)	0.09	284	1
carotid ultrasound measurements (near wall)	0.09	251	1
blood pressure measurements (ankle brachial)	0.09	49	1
artery ultrasound measurements	0.09	246	1
carotid distensibility measurements	0.09	95	1
carotid distensibility measurements	0.09	96	1
blood pressure measurements (brachial)	0.09	47	1
carotid ultrasound measurements (right common carotid)	0.09	184	1
smoking history (cigar/cigarello)	0.09	6	1
carotid ultrasound results (plaque shadow)	0.09	101	1
cardiovascular health history (cardiovascular disease)	0.09	1	1
cardiac ultrasound results (cardiac measurements)	0.09	103	1
ultrasound measurements (near wall)	0.09	287	1
cornell voltage measurements	0.09	53	1
drinking history	0.09	333	2
diet	0.09	377	2
diet	0.09	378	2
drinking history	0.09	331	2
smoking history (years not smoked)	0.09	195	2
smoking history (cig/day)	0.09	343	2
diet (sugar)	0.09	374	2
health history (chest pain)	0.09	244	2
health history (cardiac procedures)	0.09	245	2
drinking history	0.09	236	2
health history (cardiac procedures)	0.09	247	2
health history (hair loss)	0.09	232	2
blood pressure measurements	0.09	252	2
drinking history	0.09	270	2
NS	0.09	253	2
health history (pregnancy)	0.09	223	2
smoking history (inhale)	0.09	254	2
health history (vasectomy)	0.09	217	2
health history (cardiac tests)	0.09	260	2
blood pressure measurements (ankle brachial)	0.09	240	2
medication (birth control)	0.09	200	2
hematology results (WBC count)	0.09	226	2
hematology results	0.09	261	2
demographics (marital status/living situation)	0.09	323	2
diet	0.09	379	2
diet (biscuits)	0.09	123	2
diet (white bread)	0.09	122	2
diet (broccoli)	0.09	121	2
exercise/physical acivity	0.09	120	2
metabolic panel results	0.09	119	2
demographics (household occupants)	0.09	115	2
health history (edema)	0.09	392	2
smoking history (secondhand smoke exposure)	0.09	182	2
health history (hormone use)	0.09	401	2
drinking history	0.09	46	2
diet/nutrient level measurements	0.09	34	2
diet/nutrient level measurements	0.09	33	2
diet/nutrient level measurements	0.09	32	2
diet	0.09	25	2
exercise/physical activity	0.09	18	2
exercise/physical acivity	0.09	11	2
drinking history	0.09	8	2
demographics (occupation/education)	0.09	7	2
smoking history (general)	0.09	3	2
diet (diet soft drinks)	0.09	124	2
diet (tea)	0.09	125	2
blood pressure measurements (sitting)	0.09	106	2
diet (visible fat on meat)	0.09	126	2
diet	0.09	381	2
diet	0.09	380	2
diet	0.09	386	2
health history (dental)	0.09	169	2
hematology results (platelet count)	0.09	176	2
diet	0.09	387	2
drinking history	0.09	330	2
diet	0.09	388	2
exercise/physical activity (work-related)	0.09	179	2
smoking history (nicotine use)	0.09	180	2
diet	0.09	389	2
demographics (marital status)	0.09	177	2
diet (wine)	0.09	385	2
maternal health history (heart disease)	0.09	55	3
family health history (diabetes)	0.09	51	3
maternal health history (heart attack)	0.09	218	3
maternal health history (stroke)	0.09	54	3
maternal health history (high blood pressure)	0.09	222	3
maternal health history	0.09	15	3
maternal health history (high blood pressure)	0.09	214	3
maternal health history (age at death)	0.09	220	3
paternal health history (heart attack)	0.09	262	4
paternal health history (stroke)	0.09	263	4
paternal health history (cancer)	0.09	264	4
paternal health history (age at death)	0.09	265	4
paternal health history (high blood pressure)	0.09	266	4
family health history (blood pressure)	0.09	159	4
paternal health history (stroke)	0.09	98	4
paternal health history (coronary heart disease/heart attack)	0.09	102	4
paternal health history	0.09	19	4
health history (chest pain)	0.09	384	5
health history (edema)	0.09	375	5
health history (dental)	0.09	340	5
cardiac ultrasound measurements (output)	0.09	413	5
medication (aspirin)	0.09	406	5
demographics (parental education)	0.09	410	5
health history (glaucoma)	0.09	351	5
health history (laser treatment)	0.09	350	5
medication	0.09	347	5
health history (hormone use)	0.09	352	5
health history (hormone use)	0.09	353	5
health history (stroke)	0.09	390	5
Biomarker measurements	0.09	345	5
health history (hormone use)	0.09	397	5
medication	0.09	411	5
health history (head injury)	0.09	342	5
health history (hormone use)	0.09	400	5
health history (gallbladder)	0.09	373	5
Biomarker measurements	0.09	402	5
medication	0.09	403	5
health history (stroke)	0.09	404	5
health history (head injury)	0.09	405	5
ultrasound results	0.09	407	5
ultrasound results	0.09	409	5
health history (hormone use)	0.09	399	5
diet/nutrient level measurements (fish/omega3)	0.09	383	5
medication (birth control)	0.09	199	5
ultrasound results	0.09	316	5
cardiac health history (murmur)	0.09	22	5
cardiac health history (murmur)	0.09	23	5
skinfold measurement (Sub caps)	0.09	60	5
skinfold measurement (triceps)	0.09	61	5
health history (female reproductive system/hormone use)	0.09	62	5
health history (cancer)	0.09	71	5
cardiac measurements (heart rate, blood flow measurements )	0.09	75	5
health history (stroke)	0.09	132	5
demographics (parental education)	0.09	167	5
ultrasound results	0.09	318	5
health history (cataracts)	0.09	181	5
medication (birth control)	0.09	197	5
medication (birth control)	0.09	198	5
health history (cancer)	0.09	415	5
health history (gallbladder)	0.09	172	5
diet (dietary supplements)	0.09	416	5
ultrasound results	0.09	282	5
ultrasound results	0.09	280	5
ultrasound results	0.09	279	5
health history (vasectomy)	0.09	234	5
ultrasound results	0.09	278	5
ultrasound results	0.09	277	5
ultrasound results	0.09	276	5
ultrasound results	0.09	274	5
medication (hormone usage)	0.09	272	5
medication (hormone usage)	0.09	271	5
health history (stroke)	0.09	59	6
health history (stroke/paralysis)	0.09	64	6
health history (stroke)	0.09	107	6
health history (stroke)	0.09	157	6
health history (stroke/paralysis)	0.09	160	6
health history (stroke/paralysis)	0.09	113	6
paternal health history (diabetes)	0.09	63	7
family health history (age at death)	0.09	243	8
family health history (age at death)	0.09	153	8
family health history (heart attack)	0.09	152	8
family health history (age at death)	0.09	208	8
family health history (heart attack)	0.09	225	8
family health history (heart attack)	0.09	207	8
family health history (stroke)	0.09	204	8
family health history (age at death)	0.09	229	8
demographics (number of siblings)	0.09	100	8
family health history (stroke)	0.09	239	8
family health history (age at death)	0.09	189	8
family health history (heart attack)	0.09	188	8
family health history (heart attack)	0.09	241	8
family health history (stroke)	0.09	187	8
demographics (siblings)	0.09	66	8
mental well-being (life satisfaction)	0.09	84	9
mental well-being (anger)	0.09	86	9
mental well-being (anger)	0.09	90	9
mental well-being (intrapersonal support)	0.09	93	9
mental well-being (intrapersonal support)	0.09	104	9
mental well-being (anger)	0.09	165	9
diet	0.09	110	10
health history (hepatitis)	0.09	173	11
health history (polyp in colon)	0.09	175	12
family health history (stroke)	0.09	224	13

## Sheet: 0.1
Cluster Name	Clustering threshold	Cluster Number	Cluster Group
cardiovascular health history (heart attack/stroke/coronary heart disease)	0.1	0	0
physical ability	0.1	166	0
physical ability	0.1	164	0
general physical/mental health	0.1	163	0
physical ability	0.1	162	0
medication	0.1	161	0
diet/nutrient level measurements	0.1	118	0
diet/nutrient level measurements	0.1	117	0
diet/nutrient level measurements	0.1	116	0
diet	0.1	376	0
medication (cholesterol lowering)	0.1	112	0
nutrient measurements	0.1	111	0
diet (dietary supplements)	0.1	109	0
diet (vitamin E)	0.1	108	0
diet (dietary supplements)	0.1	382	0
medication	0.1	94	0
cardiovascular health history (congestive heart failure)	0.1	73	0
cardiovascular health history (congestive heart failure)	0.1	72	0
Biomarker measurements	0.1	346	0
medication (cholesterol lowering)	0.1	70	0
health history (arthritis)	0.1	168	0
health history (stiffness/pain)	0.1	171	0
lung health history (breathlessness)	0.1	258	0
health history (sinuses)	0.1	250	0
health history (cardiac surgery)	0.1	249	0
lung health history (wheezing)	0.1	248	0
health history (stiffness/swelling/pain)	0.1	259	0
health history (stiffness/swelling/pain)	0.1	267	0
health history (arthritis)	0.1	238	0
medication (calcium channel blocker)	0.1	294	0
medication	0.1	202	0
health history (nightime urination)	0.1	332	0
medication	0.1	194	0
medication (heart rhythm)	0.1	186	0
lung health history (cough/duration)	0.1	338	0
medication (prescription)	0.1	183	0
medication (heart medication)	0.1	339	0
lung health history (cough/wheezing)	0.1	341	0
health history (thryoid)	0.1	174	0
health history (stiffness/pain)	0.1	170	0
lung health history (lung disease)	0.1	67	0
medication	0.1	127	0
medication (heart medication)	0.1	398	0
blood lipid levels (LDL, Apolipoprotein, total cholesterol)	0.1	29	0
medication	0.1	30	0
lung health history (bronchitis)	0.1	20	0
medication	0.1	411	0
medication (aspirin)	0.1	406	0
lung health history (cough)	0.1	13	0
diet	0.1	17	0
health history (atrial fibrillation)	0.1	12	0
lung health history (asthma)	0.1	14	0
lung health history (emphysema)	0.1	16	0
ultrasound results	0.1	396	1
cardiocascular health history (perpheral artery disease)	0.1	50	1
blood pressure measurements (ankle brachial)	0.1	49	1
carotid ultrasound measurements (near wall)	0.1	412	1
carotid ultrasound measurements (right common carotid, wall width)	0.1	193	1
artery ultrasound measurements	0.1	372	1
carotid ultrasound measurements	0.1	256	1
carotid ultrasound measurements (left/right internal carotid)	0.1	191	1
diet	0.1	213	1
carotid ultrasound measurements (left common carotid)	0.1	190	1
carotid ultrasound results	0.1	45	1
carotid ultrasound measurements (right common carotid)	0.1	184	1
blood lipid levels (HDL, Apolipoprotein)	0.1	28	1
kidney function measurements (creatine, urea, dialysis)	0.1	26	1
carotid ultrasound measurements (left common carotid, wall width)	0.1	192	1
carotid ultrasound measurements (far wall)	0.1	216	1
ultrasound measurements (near wall)	0.1	287	1
carotid ultrasound measurements	0.1	219	1
cardiovascular health history (cardiovascular disease)	0.1	1	1
carotid ultrasound measurements (near wall)	0.1	251	1
artery ultrasound measurements	0.1	246	1
blood pressure measurements (sitting/diastolic)	0.1	58	1
ultrasound results	0.1	273	1
kidney function measurements (uric acid measurements)	0.1	97	1
blood pressure measurements (sitting/diastolic)	0.1	57	1
carotid ultrasound measurements (right carotid)	0.1	233	1
carotid ultrasound results (plaque shadow)	0.1	101	1
ultrasound results	0.1	408	1
cardiac ultrasound results (cardiac measurements)	0.1	103	1
carotid ultrasound results (far wall measurements, plaque)	0.1	231	1
carotid ultrasound measurements (near wall)	0.1	230	1
health history (hair loss)	0.1	232	2
exercise/physical activity (work-related)	0.1	179	2
health history (pregnancy)	0.1	223	2
smoking history (nicotine use)	0.1	180	2
hematology results (platelet count)	0.1	176	2
smoking history (general)	0.1	3	2
demographics (occupation/education)	0.1	7	2
drinking history	0.1	8	2
smoking history (secondhand smoke exposure)	0.1	182	2
hematology results	0.1	261	2
smoking history (years not smoked)	0.1	195	2
exercise/physical acivity	0.1	11	2
exercise/physical activity	0.1	18	2
drinking history	0.1	270	2
drinking history	0.1	333	2
health history (vasectomy)	0.1	217	2
drinking history	0.1	330	2
drinking history	0.1	331	2
hematology results (WBC count)	0.1	226	2
drinking history	0.1	236	2
smoking history (inhale)	0.1	254	2
diet (diet soft drinks)	0.1	124	2
diet (sugar)	0.1	374	2
exercise/physical acivity	0.1	120	2
diet (broccoli)	0.1	121	2
diet (white bread)	0.1	122	2
diet (biscuits)	0.1	123	2
diet	0.1	378	2
diet (tea)	0.1	125	2
diet (visible fat on meat)	0.1	126	2
diet	0.1	386	2
diet	0.1	387	2
diet (wine)	0.1	385	2
diet	0.1	388	2
diet	0.1	389	2
diet	0.1	381	2
diet	0.1	380	2
diet/nutrient level measurements	0.1	34	2
diet/nutrient level measurements	0.1	33	2
diet/nutrient level measurements	0.1	32	2
diet	0.1	377	2
diet	0.1	379	2
blood pressure measurements (sitting)	0.1	106	2
smoking history (cig/day)	0.1	343	2
drinking history	0.1	46	2
ultrasound results	0.1	274	3
health history (chest pain)	0.1	384	3
diet/nutrient level measurements (fish/omega3)	0.1	383	3
health history (hormone use)	0.1	397	3
medication (hormone usage)	0.1	271	3
health history (cardiac tests)	0.1	260	3
health history (hormone use)	0.1	401	3
health history (hormone use)	0.1	400	3
cardiac ultrasound measurements (output)	0.1	413	3
health history (stroke)	0.1	390	3
health history (hormone use)	0.1	399	3
health history (edema)	0.1	392	3
medication (hormone usage)	0.1	272	3
ultrasound results	0.1	276	3
health history (stroke)	0.1	404	3
Biomarker measurements	0.1	402	3
health history (dental)	0.1	340	3
ultrasound results	0.1	407	3
Biomarker measurements	0.1	345	3
medication	0.1	347	3
health history (laser treatment)	0.1	350	3
health history (glaucoma)	0.1	351	3
cardiac ultrasound measurements (aorta)	0.1	336	3
cardiac ultrasound measurements (left atrium)	0.1	334	3
health history (hormone use)	0.1	352	3
health history (hormone use)	0.1	353	3
ultrasound results	0.1	277	3
health history (gallbladder)	0.1	373	3
ultrasound results	0.1	316	3
health history (edema)	0.1	375	3
health history (head injury)	0.1	405	3
cardiac ultrasound measurements (left ventricular)	0.1	284	3
ultrasound results	0.1	282	3
health history (head injury)	0.1	342	3
ultrasound results	0.1	280	3
medication	0.1	403	3
ultrasound results	0.1	279	3
ultrasound results	0.1	278	3
ultrasound results	0.1	318	3
ultrasound results	0.1	409	3
medication (birth control)	0.1	199	3
blood pressure measurements	0.1	252	3
medication (birth control)	0.1	198	3
medication (birth control)	0.1	197	3
health history (cataracts)	0.1	181	3
health history (dental)	0.1	169	3
NS	0.1	253	3
metabolic panel results	0.1	119	3
carotid distensibility measurements	0.1	96	3
carotid distensibility measurements	0.1	95	3
cardiac measurements (heart rate, blood flow measurements )	0.1	75	3
health history (cancer)	0.1	71	3
health history (female reproductive system/hormone use)	0.1	62	3
skinfold measurement (triceps)	0.1	61	3
skinfold measurement (Sub caps)	0.1	60	3
cornell voltage measurements	0.1	53	3
blood pressure measurements (brachial)	0.1	47	3
cardiac health history (murmur)	0.1	23	3
smoking history (cigar/cigarello)	0.1	6	3
health history (cancer)	0.1	415	3
medication (birth control)	0.1	200	3
diet (dietary supplements)	0.1	416	3
health history (chest pain)	0.1	244	3
blood pressure measurements (ankle brachial)	0.1	240	3
hematology results (WBC count)	0.1	215	3
health history (cardiac procedures)	0.1	245	3
health history (cardiac procedures)	0.1	247	3
maternal health history (heart disease)	0.1	55	4
maternal health history (stroke)	0.1	54	4
family health history (diabetes)	0.1	51	4
maternal health history	0.1	15	4
maternal health history (high blood pressure)	0.1	214	4
maternal health history (age at death)	0.1	220	4
maternal health history (high blood pressure)	0.1	222	4
maternal health history (heart attack)	0.1	218	4
paternal health history (heart attack)	0.1	262	5
paternal health history (stroke)	0.1	98	5
family health history (blood pressure)	0.1	159	5
paternal health history (stroke)	0.1	263	5
paternal health history (cancer)	0.1	264	5
paternal health history (coronary heart disease/heart attack)	0.1	102	5
paternal health history (age at death)	0.1	265	5
paternal health history	0.1	19	5
paternal health history (high blood pressure)	0.1	266	5
cardiac health history (murmur)	0.1	22	6
diet	0.1	25	7
health history (stroke/paralysis)	0.1	64	8
health history (stroke)	0.1	59	8
paternal health history (diabetes)	0.1	63	9
family health history (age at death)	0.1	243	10
family health history (heart attack)	0.1	241	10
family health history (age at death)	0.1	208	10
demographics (number of siblings)	0.1	100	10
demographics (siblings)	0.1	66	10
family health history (heart attack)	0.1	188	10
family health history (stroke)	0.1	204	10
family health history (age at death)	0.1	189	10
demographics (marital status/living situation)	0.1	323	10
health history (stroke)	0.1	132	10
family health history (heart attack)	0.1	152	10
family health history (age at death)	0.1	153	10
demographics (parental education)	0.1	167	10
family health history (age at death)	0.1	229	10
demographics (parental education)	0.1	410	10
demographics (marital status)	0.1	177	10
family health history (heart attack)	0.1	225	10
family health history (stroke)	0.1	187	10
family health history (heart attack)	0.1	207	10
demographics (household occupants)	0.1	115	10
mental well-being (intrapersonal support)	0.1	104	11
mental well-being (anger)	0.1	86	11
mental well-being (anger)	0.1	90	11
mental well-being (intrapersonal support)	0.1	93	11
mental well-being (anger)	0.1	165	11
mental well-being (life satisfaction)	0.1	84	11
health history (stroke)	0.1	157	12
health history (stroke/paralysis)	0.1	160	12
health history (stroke/paralysis)	0.1	113	12
health history (stroke)	0.1	107	12
diet	0.1	110	13
health history (gallbladder)	0.1	172	14
health history (hepatitis)	0.1	173	15
health history (polyp in colon)	0.1	175	16
diet (baking)	0.1	185	17
family health history (stroke)	0.1	224	18
health history (vasectomy)	0.1	234	19
family health history (stroke)	0.1	239	20

## Sheet: 0.11
Cluster Name	Clustering threshold	Cluster Number	Cluster Group
cardiovascular health history (heart attack/stroke/coronary heart disease)	0.11	0	0
medication	0.11	94	0
medication	0.11	202	0
medication	0.11	194	0
medication (heart rhythm)	0.11	186	0
medication (prescription)	0.11	183	0
health history (thryoid)	0.11	174	0
medication	0.11	161	0
medication (heart medication)	0.11	398	0
medication	0.11	127	0
diet/nutrient level measurements	0.11	118	0
diet/nutrient level measurements	0.11	117	0
diet/nutrient level measurements	0.11	116	0
medication (cholesterol lowering)	0.11	112	0
diet (dietary supplements)	0.11	109	0
diet (vitamin E)	0.11	108	0
lung health history (lung disease)	0.11	67	0
medication (cholesterol lowering)	0.11	70	0
medication	0.11	30	0
blood lipid levels (LDL, Apolipoprotein, total cholesterol)	0.11	29	0
diet	0.11	376	0
lung health history (cough)	0.11	13	0
lung health history (cough/duration)	0.11	338	0
medication (heart medication)	0.11	339	0
lung health history (cough/wheezing)	0.11	341	0
lung health history (breathlessness)	0.11	258	0
lung health history (asthma)	0.11	14	0
health history (cardiac surgery)	0.11	249	0
lung health history (emphysema)	0.11	16	0
cardiovascular health history (congestive heart failure)	0.11	72	0
lung health history (wheezing)	0.11	248	0
lung health history (bronchitis)	0.11	20	0
Biomarker measurements	0.11	346	0
diet	0.11	17	0
drinking history	0.11	331	1
cardiac ultrasound measurements (left ventricular)	0.11	284	1
cardiac ultrasound measurements (left atrium)	0.11	334	1
carotid distensibility measurements	0.11	95	1
carotid distensibility measurements	0.11	96	1
kidney function measurements (uric acid measurements)	0.11	97	1
carotid ultrasound measurements	0.11	219	1
cardiac ultrasound measurements (aorta)	0.11	336	1
artery ultrasound measurements	0.11	372	1
diet	0.11	213	1
carotid ultrasound measurements (left/right internal carotid)	0.11	191	1
artery ultrasound measurements	0.11	246	1
cardiac ultrasound results (cardiac measurements)	0.11	103	1
hematology results (WBC count)	0.11	215	1
drinking history	0.11	330	1
smoking history (cigar/cigarello)	0.11	6	1
kidney function measurements (creatine, urea, dialysis)	0.11	26	1
cardiocascular health history (perpheral artery disease)	0.11	50	1
blood pressure measurements (sitting/diastolic)	0.11	58	1
cardiovascular health history (cardiovascular disease)	0.11	1	1
blood pressure measurements (ankle brachial)	0.11	49	1
blood pressure measurements (sitting/diastolic)	0.11	57	1
ultrasound results	0.11	408	1
cornell voltage measurements	0.11	53	1
blood pressure measurements (brachial)	0.11	47	1
blood lipid levels (HDL, Apolipoprotein)	0.11	28	1
diet/nutrient level measurements	0.11	34	2
diet (wine)	0.11	385	2
diet	0.11	381	2
smoking history (cig/day)	0.11	343	2
diet	0.11	380	2
smoking history (inhale)	0.11	254	2
health history (atrial fibrillation)	0.11	12	2
smoking history (years not smoked)	0.11	195	2
diet (biscuits)	0.11	123	2
diet	0.11	386	2
diet	0.11	379	2
health history (edema)	0.11	392	2
health history (dental)	0.11	169	2
drinking history	0.11	236	2
hematology results	0.11	261	2
diet	0.11	389	2
diet	0.11	388	2
hematology results (platelet count)	0.11	176	2
diet	0.11	387	2
exercise/physical activity (work-related)	0.11	179	2
smoking history (nicotine use)	0.11	180	2
drinking history	0.11	46	2
diet (visible fat on meat)	0.11	126	2
smoking history (secondhand smoke exposure)	0.11	182	2
diet (diet soft drinks)	0.11	124	2
health history (hair loss)	0.11	232	2
hematology results (WBC count)	0.11	226	2
diet (sugar)	0.11	374	2
health history (edema)	0.11	375	2
medication (calcium channel blocker)	0.11	294	2
health history (pregnancy)	0.11	223	2
health history (vasectomy)	0.11	217	2
drinking history	0.11	333	2
smoking history (general)	0.11	3	2
diet (tea)	0.11	125	2
demographics (occupation/education)	0.11	7	2
blood pressure measurements (sitting)	0.11	106	2
health history (dental)	0.11	340	2
drinking history	0.11	270	2
diet/nutrient level measurements	0.11	32	2
diet	0.11	377	2
diet	0.11	378	2
metabolic panel results	0.11	119	2
diet/nutrient level measurements	0.11	33	2
diet (broccoli)	0.11	121	2
diet (white bread)	0.11	122	2
drinking history	0.11	8	2
exercise/physical activity	0.11	18	3
health history (stiffness/swelling/pain)	0.11	259	3
cardiovascular health history (congestive heart failure)	0.11	73	3
health history (arthritis)	0.11	238	3
health history (arthritis)	0.11	168	3
health history (stiffness/pain)	0.11	170	3
health history (stiffness/pain)	0.11	171	3
mental well-being (life satisfaction)	0.11	84	3
mental well-being (anger)	0.11	86	3
mental well-being (anger)	0.11	90	3
mental well-being (intrapersonal support)	0.11	93	3
health history (nightime urination)	0.11	332	3
mental well-being (intrapersonal support)	0.11	104	3
exercise/physical acivity	0.11	11	3
exercise/physical acivity	0.11	120	3
health history (stiffness/swelling/pain)	0.11	267	3
physical ability	0.11	166	3
mental well-being (anger)	0.11	165	3
physical ability	0.11	164	3
general physical/mental health	0.11	163	3
physical ability	0.11	162	3
maternal health history	0.11	15	4
maternal health history (stroke)	0.11	54	4
maternal health history (heart disease)	0.11	55	4
family health history (diabetes)	0.11	51	4
maternal health history (high blood pressure)	0.11	222	4
maternal health history (high blood pressure)	0.11	214	4
maternal health history (age at death)	0.11	220	4
maternal health history (heart attack)	0.11	218	4
family health history (blood pressure)	0.11	159	5
paternal health history	0.11	19	5
paternal health history (stroke)	0.11	98	5
paternal health history (coronary heart disease/heart attack)	0.11	102	5
paternal health history (high blood pressure)	0.11	266	5
paternal health history (age at death)	0.11	265	5
paternal health history (cancer)	0.11	264	5
paternal health history (stroke)	0.11	263	5
paternal health history (heart attack)	0.11	262	5
cardiac health history (murmur)	0.11	22	6
cardiac health history (murmur)	0.11	23	7
diet	0.11	25	8
ultrasound results	0.11	273	9
ultrasound measurements (near wall)	0.11	287	9
carotid ultrasound measurements	0.11	256	9
carotid ultrasound measurements (near wall)	0.11	251	9
carotid ultrasound measurements (right common carotid, wall width)	0.11	193	9
carotid ultrasound results (far wall measurements, plaque)	0.11	231	9
carotid ultrasound results (plaque shadow)	0.11	101	9
carotid ultrasound measurements (near wall)	0.11	412	9
carotid ultrasound measurements (right carotid)	0.11	233	9
carotid ultrasound measurements (right common carotid)	0.11	184	9
carotid ultrasound measurements (left common carotid)	0.11	190	9
carotid ultrasound results	0.11	45	9
carotid ultrasound measurements (left common carotid, wall width)	0.11	192	9
carotid ultrasound measurements (far wall)	0.11	216	9
ultrasound results	0.11	396	9
carotid ultrasound measurements (near wall)	0.11	230	9
health history (cataracts)	0.11	181	10
health history (sinuses)	0.11	250	10
health history (stroke)	0.11	59	10
health history (head injury)	0.11	342	10
health history (stroke/paralysis)	0.11	64	10
health history (chest pain)	0.11	384	10
health history (laser treatment)	0.11	350	10
ultrasound results	0.11	278	10
ultrasound results	0.11	279	10
health history (glaucoma)	0.11	351	10
ultrasound results	0.11	280	10
medication	0.11	411	11
diet (dietary supplements)	0.11	382	11
medication (aspirin)	0.11	406	11
health history (head injury)	0.11	405	11
demographics (parental education)	0.11	410	11
ultrasound results	0.11	409	11
health history (hormone use)	0.11	353	11
health history (hormone use)	0.11	352	11
Biomarker measurements	0.11	402	11
health history (stroke)	0.11	404	11
medication	0.11	403	11
Biomarker measurements	0.11	345	11
health history (hormone use)	0.11	401	11
health history (hormone use)	0.11	400	11
health history (hormone use)	0.11	399	11
health history (hormone use)	0.11	397	11
health history (stroke)	0.11	390	11
diet/nutrient level measurements (fish/omega3)	0.11	383	11
medication	0.11	347	11
health history (gallbladder)	0.11	373	11
cardiac ultrasound measurements (output)	0.11	413	11
ultrasound results	0.11	407	11
medication (birth control)	0.11	199	11
ultrasound results	0.11	318	11
skinfold measurement (Sub caps)	0.11	60	11
skinfold measurement (triceps)	0.11	61	11
health history (female reproductive system/hormone use)	0.11	62	11
health history (cancer)	0.11	71	11
cardiac measurements (heart rate, blood flow measurements )	0.11	75	11
demographics (household occupants)	0.11	115	11
health history (stroke)	0.11	132	11
demographics (parental education)	0.11	167	11
demographics (marital status)	0.11	177	11
family health history (stroke)	0.11	187	11
demographics (marital status/living situation)	0.11	323	11
medication (birth control)	0.11	198	11
health history (cancer)	0.11	415	11
blood pressure measurements (ankle brachial)	0.11	240	11
medication (birth control)	0.11	197	11
diet (dietary supplements)	0.11	416	11
NS	0.11	253	11
blood pressure measurements	0.11	252	11
medication (hormone usage)	0.11	271	11
health history (cardiac procedures)	0.11	247	11
health history (cardiac procedures)	0.11	245	11
health history (chest pain)	0.11	244	11
health history (cardiac tests)	0.11	260	11
medication (hormone usage)	0.11	272	11
ultrasound results	0.11	274	11
ultrasound results	0.11	276	11
ultrasound results	0.11	277	11
ultrasound results	0.11	282	11
ultrasound results	0.11	316	11
paternal health history (diabetes)	0.11	63	12
demographics (siblings)	0.11	66	13
family health history (heart attack)	0.11	152	13
family health history (age at death)	0.11	153	13
demographics (number of siblings)	0.11	100	13
family health history (heart attack)	0.11	241	13
family health history (age at death)	0.11	243	13
family health history (age at death)	0.11	229	13
family health history (heart attack)	0.11	188	13
family health history (age at death)	0.11	189	13
family health history (heart attack)	0.11	225	13
family health history (age at death)	0.11	208	13
family health history (heart attack)	0.11	207	13
health history (stroke)	0.11	107	14
health history (stroke/paralysis)	0.11	160	14
health history (stroke)	0.11	157	14
health history (stroke/paralysis)	0.11	113	14
diet	0.11	110	15
nutrient measurements	0.11	111	16
health history (gallbladder)	0.11	172	17
health history (hepatitis)	0.11	173	18
health history (polyp in colon)	0.11	175	19
diet (baking)	0.11	185	20
medication (birth control)	0.11	200	21
family health history (stroke)	0.11	204	22
family health history (stroke)	0.11	224	23
health history (vasectomy)	0.11	234	24
family health history (stroke)	0.11	239	25

## Sheet: 0.12
Cluster Name	Clustering threshold	Cluster Number	Cluster Group
cardiovascular health history (heart attack/stroke/coronary heart disease)	0.12	0	0
cardiovascular health history (congestive heart failure)	0.12	72	0
medication	0.12	94	0
medication (heart medication)	0.12	398	0
diet (vitamin E)	0.12	108	0
diet (dietary supplements)	0.12	109	0
medication (cholesterol lowering)	0.12	112	0
diet/nutrient level measurements	0.12	116	0
diet/nutrient level measurements	0.12	117	0
diet/nutrient level measurements	0.12	118	0
medication	0.12	127	0
diet (dietary supplements)	0.12	382	0
diet	0.12	376	0
health history (thryoid)	0.12	174	0
medication (prescription)	0.12	183	0
Biomarker measurements	0.12	346	0
medication (heart rhythm)	0.12	186	0
medication	0.12	194	0
lung health history (cough/wheezing)	0.12	341	0
medication (heart medication)	0.12	339	0
medication	0.12	202	0
drinking history	0.12	333	0
health history (nightime urination)	0.12	332	0
lung health history (wheezing)	0.12	248	0
health history (cardiac surgery)	0.12	249	0
lung health history (breathlessness)	0.12	258	0
medication (cholesterol lowering)	0.12	70	0
lung health history (lung disease)	0.12	67	0
medication	0.12	161	0
diet	0.12	17	0
lung health history (bronchitis)	0.12	20	0
blood lipid levels (LDL, Apolipoprotein, total cholesterol)	0.12	29	0
medication	0.12	30	0
lung health history (asthma)	0.12	14	0
lung health history (emphysema)	0.12	16	0
blood pressure measurements (ankle brachial)	0.12	49	1
health history (hormone use)	0.12	401	1
blood pressure measurements (brachial)	0.12	47	1
kidney function measurements (uric acid measurements)	0.12	97	1
carotid ultrasound measurements	0.12	219	1
diet	0.12	213	1
cardiac ultrasound results (cardiac measurements)	0.12	103	1
carotid ultrasound measurements (left/right internal carotid)	0.12	191	1
cardiac ultrasound measurements (left atrium)	0.12	334	1
cardiac ultrasound measurements (aorta)	0.12	336	1
blood lipid levels (HDL, Apolipoprotein)	0.12	28	1
health history (atrial fibrillation)	0.12	12	1
hematology results (WBC count)	0.12	215	1
cardiac measurements (heart rate, blood flow measurements )	0.12	75	1
artery ultrasound measurements	0.12	372	1
blood pressure measurements	0.12	252	1
cardiocascular health history (perpheral artery disease)	0.12	50	1
medication (hormone usage)	0.12	271	1
cornell voltage measurements	0.12	53	1
blood pressure measurements (sitting/diastolic)	0.12	57	1
ultrasound results	0.12	277	1
cardiovascular health history (cardiovascular disease)	0.12	1	1
NS	0.12	253	1
cardiac ultrasound measurements (left ventricular)	0.12	284	1
ultrasound results	0.12	278	1
kidney function measurements (creatine, urea, dialysis)	0.12	26	1
artery ultrasound measurements	0.12	246	1
health history (cardiac procedures)	0.12	245	1
ultrasound results	0.12	279	1
ultrasound results	0.12	280	1
ultrasound results	0.12	408	1
diet (sugar)	0.12	374	2
health history (edema)	0.12	375	2
smoking history (cig/day)	0.12	343	2
smoking history (secondhand smoke exposure)	0.12	182	2
smoking history (nicotine use)	0.12	180	2
exercise/physical activity (work-related)	0.12	179	2
diet	0.12	377	2
health history (dental)	0.12	169	2
health history (vasectomy)	0.12	217	2
health history (dental)	0.12	340	2
drinking history	0.12	270	2
hematology results	0.12	261	2
smoking history (inhale)	0.12	254	2
smoking history (general)	0.12	3	2
drinking history	0.12	236	2
medication (calcium channel blocker)	0.12	294	2
lung health history (cough)	0.12	13	2
health history (hair loss)	0.12	232	2
drinking history	0.12	330	2
health history (pregnancy)	0.12	223	2
drinking history	0.12	331	2
diet	0.12	378	2
demographics (occupation/education)	0.12	7	2
drinking history	0.12	8	2
hematology results (WBC count)	0.12	226	2
diet	0.12	379	2
hematology results (platelet count)	0.12	176	2
diet/nutrient level measurements	0.12	33	2
diet (tea)	0.12	125	2
diet (visible fat on meat)	0.12	126	2
diet	0.12	386	2
diet (broccoli)	0.12	121	2
drinking history	0.12	46	2
diet	0.12	388	2
diet (diet soft drinks)	0.12	124	2
diet (biscuits)	0.12	123	2
diet (wine)	0.12	385	2
health history (edema)	0.12	392	2
diet/nutrient level measurements	0.12	34	2
diet (white bread)	0.12	122	2
diet/nutrient level measurements	0.12	32	2
diet	0.12	381	2
diet	0.12	389	2
metabolic panel results	0.12	119	2
smoking history (cigar/cigarello)	0.12	6	3
exercise/physical activity	0.12	18	4
exercise/physical acivity	0.12	11	4
exercise/physical acivity	0.12	120	4
maternal health history (high blood pressure)	0.12	214	5
maternal health history (age at death)	0.12	220	5
maternal health history (heart attack)	0.12	218	5
maternal health history	0.12	15	5
maternal health history (heart disease)	0.12	55	5
family health history (diabetes)	0.12	51	5
maternal health history (stroke)	0.12	54	5
paternal health history (stroke)	0.12	98	6
family health history (blood pressure)	0.12	159	6
paternal health history (coronary heart disease/heart attack)	0.12	102	6
paternal health history	0.12	19	6
paternal health history (age at death)	0.12	265	6
paternal health history (high blood pressure)	0.12	266	6
paternal health history (heart attack)	0.12	262	6
paternal health history (stroke)	0.12	263	6
paternal health history (cancer)	0.12	264	6
cardiac health history (murmur)	0.12	22	7
cardiac health history (murmur)	0.12	23	8
diet	0.12	25	9
health history (cardiac tests)	0.12	260	10
carotid ultrasound measurements (near wall)	0.12	251	10
carotid ultrasound measurements (near wall)	0.12	230	10
carotid ultrasound results (far wall measurements, plaque)	0.12	231	10
carotid ultrasound results	0.12	45	10
ultrasound measurements (near wall)	0.12	287	10
health history (cardiac procedures)	0.12	247	10
health history (chest pain)	0.12	244	10
carotid ultrasound measurements	0.12	256	10
carotid ultrasound measurements (right carotid)	0.12	233	10
carotid ultrasound measurements (near wall)	0.12	412	10
ultrasound results	0.12	273	10
carotid ultrasound measurements (left common carotid, wall width)	0.12	192	10
carotid ultrasound measurements (right common carotid, wall width)	0.12	193	10
carotid ultrasound results (plaque shadow)	0.12	101	10
carotid ultrasound measurements (far wall)	0.12	216	10
carotid ultrasound measurements (right common carotid)	0.12	184	10
carotid ultrasound measurements (left common carotid)	0.12	190	10
ultrasound results	0.12	396	10
medication	0.12	347	10
blood pressure measurements (sitting/diastolic)	0.12	58	11
health history (hormone use)	0.12	399	12
health history (head injury)	0.12	342	12
Biomarker measurements	0.12	345	12
cardiac ultrasound measurements (output)	0.12	413	12
health history (laser treatment)	0.12	350	12
health history (hormone use)	0.12	352	12
health history (hormone use)	0.12	353	12
health history (gallbladder)	0.12	373	12
ultrasound results	0.12	276	12
health history (chest pain)	0.12	384	12
diet/nutrient level measurements (fish/omega3)	0.12	383	12
health history (glaucoma)	0.12	351	12
medication	0.12	411	12
ultrasound results	0.12	409	12
ultrasound results	0.12	318	12
medication (aspirin)	0.12	406	12
diet	0.12	387	12
lung health history (cough/duration)	0.12	338	12
health history (stroke)	0.12	390	12
health history (head injury)	0.12	405	12
ultrasound results	0.12	282	12
health history (stroke)	0.12	404	12
medication	0.12	403	12
Biomarker measurements	0.12	402	12
health history (hormone use)	0.12	400	12
diet	0.12	380	12
health history (hormone use)	0.12	397	12
ultrasound results	0.12	316	12
demographics (parental education)	0.12	410	12
ultrasound results	0.12	274	12
medication (birth control)	0.12	199	12
diet (dietary supplements)	0.12	416	12
health history (cataracts)	0.12	181	12
family health history (stroke)	0.12	187	12
medication (birth control)	0.12	197	12
medication (birth control)	0.12	198	12
health history (cancer)	0.12	415	12
demographics (parental education)	0.12	167	12
health history (cancer)	0.12	71	12
health history (stroke/paralysis)	0.12	64	12
medication (hormone usage)	0.12	272	12
health history (female reproductive system/hormone use)	0.12	62	12
skinfold measurement (triceps)	0.12	61	12
skinfold measurement (Sub caps)	0.12	60	12
blood pressure measurements (ankle brachial)	0.12	240	12
health history (stroke)	0.12	59	12
health history (sinuses)	0.12	250	12
paternal health history (diabetes)	0.12	63	13
family health history (heart attack)	0.12	225	14
family health history (age at death)	0.12	153	14
family health history (heart attack)	0.12	152	14
demographics (number of siblings)	0.12	100	14
family health history (heart attack)	0.12	188	14
family health history (age at death)	0.12	189	14
family health history (age at death)	0.12	243	14
family health history (heart attack)	0.12	241	14
family health history (heart attack)	0.12	207	14
family health history (age at death)	0.12	208	14
demographics (siblings)	0.12	66	14
family health history (age at death)	0.12	229	14
mental well-being (life satisfaction)	0.12	84	15
mental well-being (intrapersonal support)	0.12	93	15
mental well-being (intrapersonal support)	0.12	104	15
physical ability	0.12	162	15
general physical/mental health	0.12	163	15
physical ability	0.12	164	15
cardiovascular health history (congestive heart failure)	0.12	73	15
health history (stiffness/swelling/pain)	0.12	267	15
health history (arthritis)	0.12	168	15
health history (stiffness/swelling/pain)	0.12	259	15
health history (arthritis)	0.12	238	15
physical ability	0.12	166	15
health history (stiffness/pain)	0.12	170	15
health history (stiffness/pain)	0.12	171	15
mental well-being (anger)	0.12	86	16
mental well-being (anger)	0.12	90	16
mental well-being (anger)	0.12	165	16
carotid distensibility measurements	0.12	96	17
carotid distensibility measurements	0.12	95	17
blood pressure measurements (sitting)	0.12	106	18
health history (stroke/paralysis)	0.12	160	19
health history (stroke)	0.12	157	19
health history (stroke/paralysis)	0.12	113	19
health history (stroke)	0.12	107	19
diet	0.12	110	20
nutrient measurements	0.12	111	21
demographics (marital status)	0.12	177	22
demographics (household occupants)	0.12	115	22
demographics (marital status/living situation)	0.12	323	22
health history (stroke)	0.12	132	23
health history (gallbladder)	0.12	172	24
health history (hepatitis)	0.12	173	25
health history (polyp in colon)	0.12	175	26
diet (baking)	0.12	185	27
smoking history (years not smoked)	0.12	195	28
medication (birth control)	0.12	200	29
family health history (stroke)	0.12	204	30
maternal health history (high blood pressure)	0.12	222	31
family health history (stroke)	0.12	224	32
health history (vasectomy)	0.12	234	33
family health history (stroke)	0.12	239	34
ultrasound results	0.12	407	35

## Sheet: 0.13
Cluster Name	Clustering threshold	Cluster Number	Cluster Group
cardiovascular health history (heart attack/stroke/coronary heart disease)	0.13	0	0
Biomarker measurements	0.13	346	0
lung health history (lung disease)	0.13	67	0
medication (cholesterol lowering)	0.13	70	0
medication (heart medication)	0.13	398	0
medication (prescription)	0.13	183	0
lung health history (cough/wheezing)	0.13	341	0
medication (heart rhythm)	0.13	186	0
medication (heart medication)	0.13	339	0
lung health history (cough/duration)	0.13	338	0
blood lipid levels (LDL, Apolipoprotein, total cholesterol)	0.13	29	0
cardiovascular health history (congestive heart failure)	0.13	72	0
health history (nightime urination)	0.13	332	0
lung health history (bronchitis)	0.13	20	0
medication	0.13	202	0
health history (cardiac surgery)	0.13	249	0
lung health history (breathlessness)	0.13	258	0
medication (cholesterol lowering)	0.13	112	0
lung health history (wheezing)	0.13	248	0
lung health history (cough)	0.13	13	0
lung health history (asthma)	0.13	14	0
diet	0.13	376	0
lung health history (emphysema)	0.13	16	0
diet	0.13	17	0
cardiovascular health history (cardiovascular disease)	0.13	1	1
diet (diet soft drinks)	0.13	124	2
diet	0.13	378	2
diet (broccoli)	0.13	121	2
diet (biscuits)	0.13	123	2
diet (white bread)	0.13	122	2
diet	0.13	388	2
diet	0.13	389	2
diet/nutrient level measurements (fish/omega3)	0.13	383	2
diet (visible fat on meat)	0.13	126	2
diet	0.13	381	2
diet	0.13	380	2
diet	0.13	386	2
diet (wine)	0.13	385	2
smoking history (secondhand smoke exposure)	0.13	182	2
diet (sugar)	0.13	374	2
drinking history	0.13	270	2
hematology results	0.13	261	2
smoking history (inhale)	0.13	254	2
blood pressure measurements (ankle brachial)	0.13	240	2
drinking history	0.13	236	2
hematology results (WBC count)	0.13	226	2
health history (pregnancy)	0.13	223	2
diet	0.13	377	2
medication (calcium channel blocker)	0.13	294	2
family health history (stroke)	0.13	187	2
smoking history (nicotine use)	0.13	180	2
exercise/physical activity (work-related)	0.13	179	2
smoking history (cig/day)	0.13	343	2
hematology results (platelet count)	0.13	176	2
demographics (parental education)	0.13	167	2
health history (gallbladder)	0.13	373	2
drinking history	0.13	333	2
health history (edema)	0.13	392	2
diet	0.13	379	2
diet/nutrient level measurements	0.13	32	2
diet/nutrient level measurements	0.13	34	2
diet/nutrient level measurements	0.13	33	2
demographics (parental education)	0.13	410	2
medication	0.13	403	2
drinking history	0.13	8	2
drinking history	0.13	46	2
demographics (occupation/education)	0.13	7	2
smoking history (general)	0.13	3	2
smoking history (cigar/cigarello)	0.13	6	3
exercise/physical acivity	0.13	11	4
exercise/physical acivity	0.13	120	4
exercise/physical activity	0.13	18	4
medication (hormone usage)	0.13	271	5
health history (hormone use)	0.13	397	5
carotid ultrasound measurements (left/right internal carotid)	0.13	191	5
cardiac ultrasound measurements (aorta)	0.13	336	5
cardiac ultrasound measurements (left atrium)	0.13	334	5
cardiac ultrasound results (cardiac measurements)	0.13	103	5
blood lipid levels (HDL, Apolipoprotein)	0.13	28	5
kidney function measurements (creatine, urea, dialysis)	0.13	26	5
drinking history	0.13	331	5
hematology results (WBC count)	0.13	215	5
carotid ultrasound measurements	0.13	219	5
Biomarker measurements	0.13	345	5
artery ultrasound measurements	0.13	372	5
cardiac ultrasound measurements (left ventricular)	0.13	284	5
ultrasound results	0.13	280	5
NS	0.13	253	5
blood pressure measurements	0.13	252	5
health history (atrial fibrillation)	0.13	12	5
health history (hormone use)	0.13	401	5
Biomarker measurements	0.13	402	5
artery ultrasound measurements	0.13	246	5
health history (cardiac procedures)	0.13	245	5
ultrasound results	0.13	277	5
ultrasound results	0.13	408	5
cardiac measurements (heart rate, blood flow measurements )	0.13	75	5
ultrasound results	0.13	278	5
ultrasound results	0.13	279	5
cornell voltage measurements	0.13	53	5
kidney function measurements (uric acid measurements)	0.13	97	5
maternal health history (heart disease)	0.13	55	6
maternal health history (high blood pressure)	0.13	214	6
maternal health history (heart attack)	0.13	218	6
maternal health history (stroke)	0.13	54	6
maternal health history (age at death)	0.13	220	6
maternal health history	0.13	15	6
paternal health history	0.13	19	7
paternal health history (age at death)	0.13	265	7
paternal health history (cancer)	0.13	264	7
paternal health history (coronary heart disease/heart attack)	0.13	102	7
cardiac health history (murmur)	0.13	22	8
cardiac health history (murmur)	0.13	23	9
diet	0.13	25	10
diet/nutrient level measurements	0.13	117	11
medication	0.13	30	11
medication	0.13	194	11
medication	0.13	161	11
diet/nutrient level measurements	0.13	116	11
medication	0.13	94	11
medication	0.13	127	11
diet (dietary supplements)	0.13	109	11
health history (thryoid)	0.13	174	11
diet (vitamin E)	0.13	108	11
diet/nutrient level measurements	0.13	118	11
carotid ultrasound measurements (near wall)	0.13	230	12
carotid ultrasound results (far wall measurements, plaque)	0.13	231	12
ultrasound measurements (near wall)	0.13	287	12
health history (chest pain)	0.13	244	12
health history (cardiac procedures)	0.13	247	12
ultrasound results	0.13	273	12
carotid ultrasound measurements (near wall)	0.13	251	12
carotid ultrasound measurements	0.13	256	12
health history (cardiac tests)	0.13	260	12
carotid ultrasound results (plaque shadow)	0.13	101	12
carotid ultrasound measurements (right carotid)	0.13	233	12
carotid ultrasound measurements (near wall)	0.13	412	12
ultrasound results	0.13	396	12
carotid ultrasound measurements (far wall)	0.13	216	12
carotid ultrasound measurements (right common carotid)	0.13	184	12
carotid ultrasound results	0.13	45	12
medication	0.13	347	12
carotid ultrasound measurements (left common carotid)	0.13	190	12
carotid ultrasound measurements (left common carotid, wall width)	0.13	192	12
carotid ultrasound measurements (right common carotid, wall width)	0.13	193	12
blood pressure measurements (brachial)	0.13	47	13
blood pressure measurements (ankle brachial)	0.13	49	14
cardiocascular health history (perpheral artery disease)	0.13	50	14
family health history (diabetes)	0.13	51	15
blood pressure measurements (sitting/diastolic)	0.13	57	16
blood pressure measurements (sitting/diastolic)	0.13	58	17
drinking history	0.13	330	18
health history (head injury)	0.13	342	18
medication	0.13	411	18
health history (stroke)	0.13	390	18
medication (hormone usage)	0.13	272	18
health history (hormone use)	0.13	399	18
cardiac ultrasound measurements (output)	0.13	413	18
ultrasound results	0.13	318	18
demographics (marital status/living situation)	0.13	323	18
health history (dental)	0.13	340	18
health history (laser treatment)	0.13	350	18
diet	0.13	387	18
health history (hormone use)	0.13	400	18
health history (glaucoma)	0.13	351	18
ultrasound results	0.13	409	18
diet (dietary supplements)	0.13	382	18
health history (hormone use)	0.13	352	18
ultrasound results	0.13	316	18
ultrasound results	0.13	276	18
health history (hormone use)	0.13	353	18
health history (chest pain)	0.13	384	18
health history (stroke)	0.13	404	18
health history (head injury)	0.13	405	18
medication (aspirin)	0.13	406	18
health history (edema)	0.13	375	18
ultrasound results	0.13	282	18
ultrasound results	0.13	274	18
medication (birth control)	0.13	199	18
diet (dietary supplements)	0.13	416	18
medication (birth control)	0.13	198	18
medication (birth control)	0.13	197	18
health history (cancer)	0.13	71	18
health history (cancer)	0.13	415	18
health history (cataracts)	0.13	181	18
health history (stroke/paralysis)	0.13	64	18
health history (female reproductive system/hormone use)	0.13	62	18
skinfold measurement (triceps)	0.13	61	18
skinfold measurement (Sub caps)	0.13	60	18
health history (stroke)	0.13	59	18
demographics (marital status)	0.13	177	18
demographics (household occupants)	0.13	115	18
paternal health history (diabetes)	0.13	63	19
family health history (age at death)	0.13	153	20
family health history (heart attack)	0.13	188	20
family health history (age at death)	0.13	189	20
family health history (heart attack)	0.13	152	20
family health history (age at death)	0.13	208	20
demographics (number of siblings)	0.13	100	20
family health history (heart attack)	0.13	225	20
family health history (age at death)	0.13	229	20
demographics (siblings)	0.13	66	20
family health history (heart attack)	0.13	241	20
family health history (age at death)	0.13	243	20
family health history (heart attack)	0.13	207	20
mental well-being (intrapersonal support)	0.13	104	21
physical ability	0.13	166	21
mental well-being (intrapersonal support)	0.13	93	21
mental well-being (life satisfaction)	0.13	84	21
cardiovascular health history (congestive heart failure)	0.13	73	21
physical ability	0.13	162	21
general physical/mental health	0.13	163	21
physical ability	0.13	164	21
health history (arthritis)	0.13	168	21
health history (stiffness/swelling/pain)	0.13	267	21
health history (stiffness/pain)	0.13	170	21
health history (stiffness/pain)	0.13	171	21
health history (stiffness/swelling/pain)	0.13	259	21
health history (sinuses)	0.13	250	21
health history (arthritis)	0.13	238	21
mental well-being (anger)	0.13	86	22
mental well-being (anger)	0.13	90	22
mental well-being (anger)	0.13	165	22
carotid distensibility measurements	0.13	95	23
carotid distensibility measurements	0.13	96	23
family health history (blood pressure)	0.13	159	24
paternal health history (stroke)	0.13	98	24
blood pressure measurements (sitting)	0.13	106	25
health history (stroke/paralysis)	0.13	160	26
health history (stroke)	0.13	107	26
health history (stroke)	0.13	157	26
health history (stroke/paralysis)	0.13	113	26
diet	0.13	110	27
nutrient measurements	0.13	111	28
metabolic panel results	0.13	119	29
diet (tea)	0.13	125	30
health history (stroke)	0.13	132	31
health history (dental)	0.13	169	32
health history (gallbladder)	0.13	172	33
health history (hepatitis)	0.13	173	34
health history (polyp in colon)	0.13	175	35
diet (baking)	0.13	185	36
smoking history (years not smoked)	0.13	195	37
medication (birth control)	0.13	200	38
family health history (stroke)	0.13	204	39
diet	0.13	213	40
health history (vasectomy)	0.13	217	41
maternal health history (high blood pressure)	0.13	222	42
family health history (stroke)	0.13	224	43
health history (hair loss)	0.13	232	44
health history (vasectomy)	0.13	234	45
family health history (stroke)	0.13	239	46
paternal health history (high blood pressure)	0.13	266	47
paternal health history (heart attack)	0.13	262	47
paternal health history (stroke)	0.13	263	47
ultrasound results	0.13	407	48

## Sheet: 0.14
Cluster Name	Clustering threshold	Cluster Number	Cluster Group
cardiovascular health history (heart attack/stroke/coronary heart disease)	0.14	0	0
cardiovascular health history (cardiovascular disease)	0.14	1	1
diet/nutrient level measurements	0.14	34	2
drinking history	0.14	46	2
diet/nutrient level measurements (fish/omega3)	0.14	383	2
diet	0.14	379	2
diet	0.14	378	2
diet	0.14	377	2
diet (sugar)	0.14	374	2
diet (white bread)	0.14	122	2
smoking history (cig/day)	0.14	343	2
lung health history (cough/duration)	0.14	338	2
smoking history (inhale)	0.14	254	2
drinking history	0.14	236	2
hematology results (WBC count)	0.14	226	2
smoking history (secondhand smoke exposure)	0.14	182	2
smoking history (nicotine use)	0.14	180	2
hematology results (platelet count)	0.14	176	2
diet (visible fat on meat)	0.14	126	2
diet (diet soft drinks)	0.14	124	2
diet (biscuits)	0.14	123	2
diet/nutrient level measurements	0.14	33	2
diet/nutrient level measurements	0.14	32	2
diet (broccoli)	0.14	121	2
diet	0.14	386	2
smoking history (general)	0.14	3	2
diet	0.14	388	2
diet	0.14	389	2
lung health history (cough)	0.14	13	2
diet (wine)	0.14	385	2
smoking history (cigar/cigarello)	0.14	6	3
drinking history	0.14	333	4
health history (pregnancy)	0.14	223	4
demographics (parental education)	0.14	410	4
medication	0.14	403	4
exercise/physical activity (work-related)	0.14	179	4
demographics (parental education)	0.14	167	4
demographics (occupation/education)	0.14	7	4
ultrasound results	0.14	274	4
medication	0.14	411	5
medication (birth control)	0.14	197	5
medication (birth control)	0.14	198	5
health history (cancer)	0.14	415	5
cardiac ultrasound measurements (output)	0.14	413	5
ultrasound results	0.14	409	5
health history (sinuses)	0.14	250	5
medication (aspirin)	0.14	406	5
carotid ultrasound measurements	0.14	256	5
drinking history	0.14	270	5
medication (hormone usage)	0.14	272	5
health history (cataracts)	0.14	181	5
medication (calcium channel blocker)	0.14	294	5
ultrasound results	0.14	282	5
diet	0.14	387	5
health history (chest pain)	0.14	384	5
diet (dietary supplements)	0.14	382	5
health history (stroke)	0.14	390	5
health history (edema)	0.14	392	5
health history (hormone use)	0.14	399	5
health history (edema)	0.14	375	5
health history (hormone use)	0.14	400	5
health history (gallbladder)	0.14	373	5
ultrasound results	0.14	276	5
health history (hormone use)	0.14	353	5
health history (laser treatment)	0.14	350	5
medication	0.14	347	5
health history (stroke)	0.14	404	5
health history (head injury)	0.14	342	5
lung health history (cough/wheezing)	0.14	341	5
health history (dental)	0.14	340	5
health history (head injury)	0.14	405	5
ultrasound results	0.14	318	5
ultrasound results	0.14	316	5
health history (glaucoma)	0.14	351	5
health history (hormone use)	0.14	352	5
medication (birth control)	0.14	199	5
diet (dietary supplements)	0.14	416	5
health history (cancer)	0.14	71	5
health history (stroke/paralysis)	0.14	64	5
health history (female reproductive system/hormone use)	0.14	62	5
skinfold measurement (triceps)	0.14	61	5
health history (stroke)	0.14	59	5
skinfold measurement (Sub caps)	0.14	60	5
drinking history	0.14	8	5
exercise/physical acivity	0.14	11	6
exercise/physical acivity	0.14	120	6
exercise/physical activity	0.14	18	6
lung health history (wheezing)	0.14	248	7
medication (heart rhythm)	0.14	186	7
lung health history (lung disease)	0.14	67	7
medication (heart medication)	0.14	339	7
medication	0.14	202	7
health history (nightime urination)	0.14	332	7
medication (heart medication)	0.14	398	7
cardiovascular health history (congestive heart failure)	0.14	72	7
lung health history (bronchitis)	0.14	20	7
lung health history (breathlessness)	0.14	258	7
lung health history (emphysema)	0.14	16	7
lung health history (asthma)	0.14	14	7
health history (atrial fibrillation)	0.14	12	7
health history (cardiac surgery)	0.14	249	7
medication (prescription)	0.14	183	7
maternal health history	0.14	15	8
maternal health history (age at death)	0.14	220	8
diet	0.14	376	9
medication	0.14	94	9
diet/nutrient level measurements	0.14	118	9
medication (cholesterol lowering)	0.14	70	9
diet/nutrient level measurements	0.14	117	9
medication	0.14	194	9
diet/nutrient level measurements	0.14	116	9
medication (cholesterol lowering)	0.14	112	9
Biomarker measurements	0.14	346	9
medication	0.14	161	9
blood lipid levels (LDL, Apolipoprotein, total cholesterol)	0.14	29	9
medication	0.14	30	9
diet	0.14	17	9
health history (thryoid)	0.14	174	9
medication	0.14	127	9
diet (dietary supplements)	0.14	109	9
diet (vitamin E)	0.14	108	9
paternal health history (age at death)	0.14	265	10
paternal health history (cancer)	0.14	264	10
paternal health history	0.14	19	10
cardiac health history (murmur)	0.14	22	11
cardiac health history (murmur)	0.14	23	12
diet	0.14	25	13
Biomarker measurements	0.14	402	14
kidney function measurements (uric acid measurements)	0.14	97	14
NS	0.14	253	14
blood pressure measurements	0.14	252	14
medication (hormone usage)	0.14	271	14
ultrasound results	0.14	277	14
ultrasound results	0.14	278	14
ultrasound results	0.14	279	14
ultrasound results	0.14	280	14
cardiac ultrasound measurements (left ventricular)	0.14	284	14
health history (cardiac procedures)	0.14	245	14
health history (hormone use)	0.14	401	14
health history (stroke)	0.14	107	14
cardiac measurements (heart rate, blood flow measurements )	0.14	75	14
cornell voltage measurements	0.14	53	14
artery ultrasound measurements	0.14	372	14
health history (stroke/paralysis)	0.14	113	14
artery ultrasound measurements	0.14	246	14
carotid ultrasound measurements (left/right internal carotid)	0.14	191	14
blood lipid levels (HDL, Apolipoprotein)	0.14	28	14
Biomarker measurements	0.14	345	14
carotid ultrasound measurements	0.14	219	14
cardiac ultrasound results (cardiac measurements)	0.14	103	14
cardiac ultrasound measurements (aorta)	0.14	336	14
cardiac ultrasound measurements (left atrium)	0.14	334	14
health history (hormone use)	0.14	397	14
hematology results (WBC count)	0.14	215	14
kidney function measurements (creatine, urea, dialysis)	0.14	26	14
drinking history	0.14	331	14
ultrasound results	0.14	273	15
health history (cardiac tests)	0.14	260	15
carotid ultrasound measurements (near wall)	0.14	412	15
ultrasound results	0.14	396	15
carotid ultrasound results	0.14	45	15
ultrasound measurements (near wall)	0.14	287	15
carotid ultrasound measurements (near wall)	0.14	251	15
health history (chest pain)	0.14	244	15
carotid ultrasound measurements (right common carotid)	0.14	184	15
carotid ultrasound measurements (left common carotid)	0.14	190	15
carotid ultrasound measurements (left common carotid, wall width)	0.14	192	15
carotid ultrasound measurements (right common carotid, wall width)	0.14	193	15
health history (cardiac procedures)	0.14	247	15
carotid ultrasound measurements (far wall)	0.14	216	15
carotid ultrasound results (plaque shadow)	0.14	101	15
carotid ultrasound measurements (near wall)	0.14	230	15
carotid ultrasound results (far wall measurements, plaque)	0.14	231	15
carotid ultrasound measurements (right carotid)	0.14	233	15
blood pressure measurements (brachial)	0.14	47	16
blood pressure measurements (ankle brachial)	0.14	49	17
cardiocascular health history (perpheral artery disease)	0.14	50	17
family health history (diabetes)	0.14	51	18
maternal health history (high blood pressure)	0.14	214	19
maternal health history (stroke)	0.14	54	19
maternal health history (heart disease)	0.14	55	20
blood pressure measurements (sitting/diastolic)	0.14	57	21
blood pressure measurements (sitting/diastolic)	0.14	58	22
paternal health history (diabetes)	0.14	63	23
family health history (age at death)	0.14	208	24
family health history (heart attack)	0.14	207	24
demographics (siblings)	0.14	66	24
family health history (heart attack)	0.14	152	24
family health history (age at death)	0.14	189	24
family health history (heart attack)	0.14	225	24
demographics (number of siblings)	0.14	100	24
family health history (age at death)	0.14	229	24
family health history (heart attack)	0.14	188	24
family health history (age at death)	0.14	153	24
family health history (heart attack)	0.14	241	24
family health history (age at death)	0.14	243	24
health history (arthritis)	0.14	238	25
mental well-being (intrapersonal support)	0.14	104	25
general physical/mental health	0.14	163	25
physical ability	0.14	162	25
health history (arthritis)	0.14	168	25
health history (stiffness/pain)	0.14	171	25
physical ability	0.14	164	25
health history (stiffness/swelling/pain)	0.14	267	25
mental well-being (intrapersonal support)	0.14	93	25
physical ability	0.14	166	25
health history (stiffness/swelling/pain)	0.14	259	25
mental well-being (life satisfaction)	0.14	84	25
health history (stiffness/pain)	0.14	170	25
cardiovascular health history (congestive heart failure)	0.14	73	25
mental well-being (anger)	0.14	86	26
mental well-being (anger)	0.14	90	26
mental well-being (anger)	0.14	165	26
carotid distensibility measurements	0.14	95	27
carotid distensibility measurements	0.14	96	27
paternal health history (stroke)	0.14	98	28
family health history (blood pressure)	0.14	159	28
paternal health history (coronary heart disease/heart attack)	0.14	102	29
blood pressure measurements (sitting)	0.14	106	30
diet	0.14	110	31
nutrient measurements	0.14	111	32
demographics (household occupants)	0.14	115	33
demographics (marital status)	0.14	177	33
demographics (marital status/living situation)	0.14	323	33
metabolic panel results	0.14	119	34
diet (tea)	0.14	125	35
health history (stroke)	0.14	132	36
health history (stroke/paralysis)	0.14	160	37
health history (stroke)	0.14	157	37
health history (dental)	0.14	169	38
health history (gallbladder)	0.14	172	39
health history (hepatitis)	0.14	173	40
health history (polyp in colon)	0.14	175	41
diet (baking)	0.14	185	42
family health history (stroke)	0.14	187	43
smoking history (years not smoked)	0.14	195	44
medication (birth control)	0.14	200	45
family health history (stroke)	0.14	204	46
diet	0.14	213	47
health history (vasectomy)	0.14	217	48
maternal health history (heart attack)	0.14	218	49
maternal health history (high blood pressure)	0.14	222	50
family health history (stroke)	0.14	224	51
health history (hair loss)	0.14	232	52
health history (vasectomy)	0.14	234	53
family health history (stroke)	0.14	239	54
blood pressure measurements (ankle brachial)	0.14	240	55
hematology results	0.14	261	56
paternal health history (heart attack)	0.14	262	57
paternal health history (high blood pressure)	0.14	266	57
paternal health history (stroke)	0.14	263	57
drinking history	0.14	330	58
diet	0.14	380	59
diet	0.14	381	60
ultrasound results	0.14	407	61
ultrasound results	0.14	408	62

## Sheet: 0.15
Cluster Name	Clustering threshold	Cluster Number	Cluster Group
cardiovascular health history (heart attack/stroke/coronary heart disease)	0.15	0	0
cardiovascular health history (cardiovascular disease)	0.15	1	1
drinking history	0.15	46	2
diet	0.15	389	2
diet	0.15	388	2
diet	0.15	386	2
diet (wine)	0.15	385	2
diet (broccoli)	0.15	121	2
diet (white bread)	0.15	122	2
diet (biscuits)	0.15	123	2
diet (visible fat on meat)	0.15	126	2
diet	0.15	379	2
diet	0.15	378	2
diet	0.15	377	2
diet (sugar)	0.15	374	2
smoking history (cig/day)	0.15	343	2
hematology results (platelet count)	0.15	176	2
smoking history (nicotine use)	0.15	180	2
smoking history (secondhand smoke exposure)	0.15	182	2
hematology results (WBC count)	0.15	226	2
drinking history	0.15	236	2
smoking history (inhale)	0.15	254	2
diet/nutrient level measurements	0.15	34	2
diet/nutrient level measurements	0.15	33	2
diet (diet soft drinks)	0.15	124	2
smoking history (general)	0.15	3	2
diet/nutrient level measurements	0.15	32	2
smoking history (cigar/cigarello)	0.15	6	3
drinking history	0.15	333	4
medication	0.15	403	4
demographics (parental education)	0.15	410	4
health history (pregnancy)	0.15	223	4
demographics (occupation/education)	0.15	7	4
exercise/physical activity (work-related)	0.15	179	4
demographics (parental education)	0.15	167	4
drinking history	0.15	8	5
health history (edema)	0.15	392	5
drinking history	0.15	270	5
medication (calcium channel blocker)	0.15	294	5
exercise/physical acivity	0.15	120	6
exercise/physical activity	0.15	18	6
exercise/physical acivity	0.15	11	6
medication (heart rhythm)	0.15	186	7
lung health history (cough/duration)	0.15	338	7
medication (prescription)	0.15	183	7
medication (heart medication)	0.15	339	7
health history (cardiac surgery)	0.15	249	7
lung health history (cough)	0.15	13	7
medication (cholesterol lowering)	0.15	112	7
lung health history (asthma)	0.15	14	7
lung health history (bronchitis)	0.15	20	7
lung health history (wheezing)	0.15	248	7
diet	0.15	376	7
health history (atrial fibrillation)	0.15	12	7
Biomarker measurements	0.15	346	7
medication (heart medication)	0.15	398	7
diet	0.15	17	7
lung health history (emphysema)	0.15	16	7
medication	0.15	202	7
lung health history (breathlessness)	0.15	258	7
lung health history (lung disease)	0.15	67	7
cardiovascular health history (congestive heart failure)	0.15	72	7
medication (cholesterol lowering)	0.15	70	7
maternal health history	0.15	15	8
paternal health history (cancer)	0.15	264	9
paternal health history (age at death)	0.15	265	9
paternal health history	0.15	19	9
cardiac health history (murmur)	0.15	22	10
cardiac health history (murmur)	0.15	23	11
diet	0.15	25	12
blood pressure measurements	0.15	252	13
health history (cardiac procedures)	0.15	245	13
artery ultrasound measurements	0.15	246	13
NS	0.15	253	13
carotid ultrasound measurements (left/right internal carotid)	0.15	191	13
ultrasound results	0.15	277	13
ultrasound results	0.15	278	13
carotid ultrasound measurements	0.15	219	13
ultrasound results	0.15	279	13
ultrasound results	0.15	280	13
hematology results (WBC count)	0.15	215	13
cardiac ultrasound measurements (left ventricular)	0.15	284	13
drinking history	0.15	331	13
cardiac ultrasound measurements (aorta)	0.15	336	13
cardiac ultrasound measurements (left atrium)	0.15	334	13
medication (hormone usage)	0.15	271	13
Biomarker measurements	0.15	345	13
artery ultrasound measurements	0.15	372	13
health history (hormone use)	0.15	397	13
cornell voltage measurements	0.15	53	13
cardiac measurements (heart rate, blood flow measurements )	0.15	75	13
Biomarker measurements	0.15	402	13
health history (hormone use)	0.15	401	13
health history (stroke/paralysis)	0.15	113	13
health history (stroke)	0.15	107	13
kidney function measurements (creatine, urea, dialysis)	0.15	26	13
kidney function measurements (uric acid measurements)	0.15	97	13
cardiac ultrasound results (cardiac measurements)	0.15	103	13
blood lipid levels (HDL, Apolipoprotein)	0.15	28	13
blood lipid levels (LDL, Apolipoprotein, total cholesterol)	0.15	29	14
medication	0.15	127	15
medication	0.15	194	15
medication	0.15	94	15
diet (vitamin E)	0.15	108	15
diet (dietary supplements)	0.15	109	15
medication	0.15	30	15
health history (thryoid)	0.15	174	15
diet/nutrient level measurements	0.15	116	15
diet/nutrient level measurements	0.15	118	15
diet/nutrient level measurements	0.15	117	15
medication	0.15	161	15
carotid ultrasound measurements (far wall)	0.15	216	16
carotid ultrasound measurements (near wall)	0.15	412	16
ultrasound results	0.15	273	16
carotid ultrasound measurements (right common carotid, wall width)	0.15	193	16
carotid ultrasound measurements (left common carotid, wall width)	0.15	192	16
carotid ultrasound measurements (near wall)	0.15	230	16
carotid ultrasound measurements (left common carotid)	0.15	190	16
ultrasound results	0.15	396	16
carotid ultrasound measurements (right carotid)	0.15	233	16
carotid ultrasound measurements (right common carotid)	0.15	184	16
carotid ultrasound results	0.15	45	16
carotid ultrasound results (plaque shadow)	0.15	101	16
ultrasound measurements (near wall)	0.15	287	16
blood pressure measurements (brachial)	0.15	47	17
cardiocascular health history (perpheral artery disease)	0.15	50	18
blood pressure measurements (ankle brachial)	0.15	49	18
family health history (diabetes)	0.15	51	19
maternal health history (stroke)	0.15	54	20
maternal health history (high blood pressure)	0.15	214	20
maternal health history (heart disease)	0.15	55	21
blood pressure measurements (sitting/diastolic)	0.15	57	22
blood pressure measurements (sitting/diastolic)	0.15	58	23
health history (gallbladder)	0.15	373	24
carotid ultrasound measurements (near wall)	0.15	251	24
lung health history (cough/wheezing)	0.15	341	24
diet/nutrient level measurements (fish/omega3)	0.15	383	24
diet	0.15	387	24
health history (dental)	0.15	340	24
medication	0.15	347	24
carotid ultrasound measurements	0.15	256	24
health history (laser treatment)	0.15	350	24
health history (edema)	0.15	375	24
health history (glaucoma)	0.15	351	24
health history (stroke)	0.15	390	24
health history (hormone use)	0.15	352	24
health history (hormone use)	0.15	353	24
cardiac ultrasound measurements (output)	0.15	413	24
ultrasound results	0.15	316	24
health history (chest pain)	0.15	384	24
ultrasound results	0.15	282	24
health history (head injury)	0.15	342	24
ultrasound results	0.15	318	24
demographics (marital status/living situation)	0.15	323	24
health history (hormone use)	0.15	400	24
health history (stroke)	0.15	404	24
medication (aspirin)	0.15	406	24
ultrasound results	0.15	409	24
medication	0.15	411	24
diet (dietary supplements)	0.15	382	24
ultrasound results	0.15	276	24
ultrasound results	0.15	274	24
health history (head injury)	0.15	405	24
health history (hormone use)	0.15	399	24
medication (birth control)	0.15	199	24
diet (dietary supplements)	0.15	416	24
medication (birth control)	0.15	197	24
health history (cataracts)	0.15	181	24
demographics (marital status)	0.15	177	24
carotid ultrasound results (far wall measurements, plaque)	0.15	231	24
general physical/mental health	0.15	163	24
medication (birth control)	0.15	198	24
demographics (household occupants)	0.15	115	24
health history (cancer)	0.15	415	24
health history (stroke/paralysis)	0.15	64	24
health history (female reproductive system/hormone use)	0.15	62	24
health history (stroke)	0.15	59	24
health history (cancer)	0.15	71	24
skinfold measurement (Sub caps)	0.15	60	24
skinfold measurement (triceps)	0.15	61	24
paternal health history (diabetes)	0.15	63	25
family health history (heart attack)	0.15	225	26
demographics (number of siblings)	0.15	100	26
demographics (siblings)	0.15	66	26
family health history (heart attack)	0.15	152	26
family health history (age at death)	0.15	153	26
family health history (age at death)	0.15	229	26
family health history (age at death)	0.15	189	26
family health history (heart attack)	0.15	188	26
cardiovascular health history (congestive heart failure)	0.15	73	27
health history (arthritis)	0.15	168	27
physical ability	0.15	166	27
physical ability	0.15	164	27
health history (stiffness/pain)	0.15	170	27
physical ability	0.15	162	27
health history (stiffness/pain)	0.15	171	27
health history (stiffness/swelling/pain)	0.15	267	27
health history (stiffness/swelling/pain)	0.15	259	27
health history (arthritis)	0.15	238	27
mental well-being (intrapersonal support)	0.15	104	28
mental well-being (life satisfaction)	0.15	84	28
mental well-being (intrapersonal support)	0.15	93	28
mental well-being (anger)	0.15	86	29
mental well-being (anger)	0.15	165	30
mental well-being (anger)	0.15	90	30
carotid distensibility measurements	0.15	95	31
carotid distensibility measurements	0.15	96	31
paternal health history (stroke)	0.15	98	32
family health history (blood pressure)	0.15	159	32
paternal health history (coronary heart disease/heart attack)	0.15	102	33
blood pressure measurements (sitting)	0.15	106	34
diet	0.15	110	35
nutrient measurements	0.15	111	36
metabolic panel results	0.15	119	37
diet (tea)	0.15	125	38
health history (stroke)	0.15	132	39
health history (stroke)	0.15	157	40
health history (stroke/paralysis)	0.15	160	40
health history (dental)	0.15	169	41
health history (gallbladder)	0.15	172	42
health history (hepatitis)	0.15	173	43
health history (polyp in colon)	0.15	175	44
diet (baking)	0.15	185	45
family health history (stroke)	0.15	187	46
smoking history (years not smoked)	0.15	195	47
medication (birth control)	0.15	200	48
family health history (stroke)	0.15	204	49
family health history (heart attack)	0.15	207	50
family health history (age at death)	0.15	208	50
diet	0.15	213	51
health history (vasectomy)	0.15	217	52
maternal health history (heart attack)	0.15	218	53
maternal health history (age at death)	0.15	220	54
maternal health history (high blood pressure)	0.15	222	55
family health history (stroke)	0.15	224	56
health history (hair loss)	0.15	232	57
health history (vasectomy)	0.15	234	58
family health history (stroke)	0.15	239	59
blood pressure measurements (ankle brachial)	0.15	240	60
family health history (heart attack)	0.15	241	61
family health history (age at death)	0.15	243	61
health history (cardiac tests)	0.15	260	62
health history (chest pain)	0.15	244	62
health history (cardiac procedures)	0.15	247	62
health history (sinuses)	0.15	250	63
hematology results	0.15	261	64
paternal health history (heart attack)	0.15	262	65
paternal health history (stroke)	0.15	263	66
paternal health history (high blood pressure)	0.15	266	66
medication (hormone usage)	0.15	272	67
drinking history	0.15	330	68
health history (nightime urination)	0.15	332	69
diet	0.15	380	70
diet	0.15	381	71
ultrasound results	0.15	407	72
ultrasound results	0.15	408	73

## Sheet: 0.16
Cluster Name	Clustering threshold	Cluster Number	Cluster Group
cardiovascular health history (heart attack/stroke/coronary heart disease)	0.16	0	0
cardiovascular health history (cardiovascular disease)	0.16	1	1
diet	0.16	389	2
diet	0.16	388	2
diet	0.16	386	2
diet (wine)	0.16	385	2
diet (broccoli)	0.16	121	2
diet (white bread)	0.16	122	2
diet (diet soft drinks)	0.16	124	2
diet (visible fat on meat)	0.16	126	2
diet/nutrient level measurements (fish/omega3)	0.16	383	2
diet	0.16	379	2
diet	0.16	378	2
diet	0.16	377	2
diet (sugar)	0.16	374	2
smoking history (cig/day)	0.16	343	2
hematology results (platelet count)	0.16	176	2
smoking history (nicotine use)	0.16	180	2
smoking history (secondhand smoke exposure)	0.16	182	2
drinking history	0.16	331	2
hematology results (WBC count)	0.16	226	2
drinking history	0.16	236	2
smoking history (inhale)	0.16	254	2
drinking history	0.16	46	2
diet/nutrient level measurements	0.16	34	2
diet (biscuits)	0.16	123	2
diet/nutrient level measurements	0.16	32	2
smoking history (general)	0.16	3	2
diet/nutrient level measurements	0.16	33	2
smoking history (cigar/cigarello)	0.16	6	3
drinking history	0.16	333	4
demographics (parental education)	0.16	167	4
medication	0.16	403	4
demographics (occupation/education)	0.16	7	4
exercise/physical activity (work-related)	0.16	179	4
health history (pregnancy)	0.16	223	4
demographics (parental education)	0.16	410	4
medication (calcium channel blocker)	0.16	294	5
health history (edema)	0.16	392	5
drinking history	0.16	8	5
drinking history	0.16	270	5
exercise/physical activity	0.16	18	6
exercise/physical acivity	0.16	120	6
exercise/physical acivity	0.16	11	6
medication (heart medication)	0.16	398	7
lung health history (cough/duration)	0.16	338	7
medication	0.16	202	7
medication (heart medication)	0.16	339	7
health history (atrial fibrillation)	0.16	12	7
lung health history (cough)	0.16	13	7
medication (cholesterol lowering)	0.16	70	7
medication (cholesterol lowering)	0.16	112	7
cardiovascular health history (congestive heart failure)	0.16	72	7
Biomarker measurements	0.16	346	7
medication (heart rhythm)	0.16	186	7
lung health history (lung disease)	0.16	67	7
diet	0.16	376	7
lung health history (emphysema)	0.16	16	7
lung health history (breathlessness)	0.16	258	7
diet	0.16	17	7
lung health history (bronchitis)	0.16	20	7
health history (cardiac surgery)	0.16	249	7
lung health history (wheezing)	0.16	248	7
lung health history (asthma)	0.16	14	7
medication (prescription)	0.16	183	7
maternal health history	0.16	15	8
paternal health history	0.16	19	9
paternal health history (age at death)	0.16	265	9
cardiac health history (murmur)	0.16	22	10
cardiac health history (murmur)	0.16	23	11
diet	0.16	25	12
blood pressure measurements	0.16	252	13
NS	0.16	253	13
medication (hormone usage)	0.16	271	13
ultrasound results	0.16	277	13
carotid ultrasound measurements (left/right internal carotid)	0.16	191	13
artery ultrasound measurements	0.16	372	13
ultrasound results	0.16	279	13
carotid ultrasound measurements	0.16	219	13
Biomarker measurements	0.16	345	13
ultrasound results	0.16	280	13
hematology results (WBC count)	0.16	215	13
cardiac ultrasound measurements (left ventricular)	0.16	284	13
cardiac ultrasound measurements (left atrium)	0.16	334	13
cardiac ultrasound measurements (aorta)	0.16	336	13
ultrasound results	0.16	278	13
artery ultrasound measurements	0.16	246	13
kidney function measurements (uric acid measurements)	0.16	97	13
health history (stroke)	0.16	107	13
cardiac ultrasound results (cardiac measurements)	0.16	103	13
blood lipid levels (HDL, Apolipoprotein)	0.16	28	13
health history (hormone use)	0.16	401	13
health history (stroke/paralysis)	0.16	113	13
cardiac measurements (heart rate, blood flow measurements )	0.16	75	13
kidney function measurements (creatine, urea, dialysis)	0.16	26	13
health history (cardiac procedures)	0.16	245	13
cornell voltage measurements	0.16	53	13
Biomarker measurements	0.16	402	13
blood lipid levels (LDL, Apolipoprotein, total cholesterol)	0.16	29	14
medication	0.16	94	15
medication	0.16	30	15
diet (vitamin E)	0.16	108	15
diet (dietary supplements)	0.16	109	15
medication	0.16	127	15
medication	0.16	194	15
medication	0.16	161	15
diet/nutrient level measurements	0.16	116	15
health history (thryoid)	0.16	174	15
diet/nutrient level measurements	0.16	118	15
diet/nutrient level measurements	0.16	117	15
ultrasound measurements (near wall)	0.16	287	16
carotid ultrasound measurements (right carotid)	0.16	233	16
carotid ultrasound measurements (near wall)	0.16	230	16
ultrasound results	0.16	273	16
carotid ultrasound measurements (near wall)	0.16	412	16
carotid ultrasound measurements (far wall)	0.16	216	16
health history (gallbladder)	0.16	373	16
carotid ultrasound measurements (right common carotid, wall width)	0.16	193	16
carotid ultrasound measurements (left common carotid, wall width)	0.16	192	16
carotid ultrasound results	0.16	45	16
ultrasound results	0.16	396	16
carotid ultrasound results (plaque shadow)	0.16	101	16
carotid ultrasound measurements (left common carotid)	0.16	190	16
carotid ultrasound measurements (right common carotid)	0.16	184	16
blood pressure measurements (brachial)	0.16	47	17
blood pressure measurements (ankle brachial)	0.16	49	18
cardiocascular health history (perpheral artery disease)	0.16	50	18
family health history (diabetes)	0.16	51	19
maternal health history (high blood pressure)	0.16	214	20
maternal health history (stroke)	0.16	54	20
maternal health history (heart disease)	0.16	55	21
blood pressure measurements (sitting/diastolic)	0.16	57	22
blood pressure measurements (sitting/diastolic)	0.16	58	23
health history (stroke/paralysis)	0.16	64	24
health history (stroke)	0.16	59	24
health history (chest pain)	0.16	384	25
health history (head injury)	0.16	342	25
health history (laser treatment)	0.16	350	25
cardiac ultrasound measurements (output)	0.16	413	25
ultrasound results	0.16	276	25
health history (glaucoma)	0.16	351	25
medication	0.16	347	25
ultrasound results	0.16	409	25
medication (aspirin)	0.16	406	25
health history (hormone use)	0.16	353	25
diet (dietary supplements)	0.16	382	25
health history (hormone use)	0.16	399	25
health history (hormone use)	0.16	400	25
health history (stroke)	0.16	390	25
demographics (marital status/living situation)	0.16	323	25
ultrasound results	0.16	318	25
health history (dental)	0.16	340	25
ultrasound results	0.16	316	25
health history (edema)	0.16	375	25
health history (stroke)	0.16	404	25
health history (hormone use)	0.16	352	25
lung health history (cough/wheezing)	0.16	341	25
ultrasound results	0.16	282	25
health history (head injury)	0.16	405	25
medication	0.16	411	25
diet	0.16	387	25
medication (birth control)	0.16	199	25
diet (dietary supplements)	0.16	416	25
demographics (marital status)	0.16	177	25
health history (cataracts)	0.16	181	25
medication (birth control)	0.16	197	25
medication (birth control)	0.16	198	25
health history (cancer)	0.16	415	25
demographics (household occupants)	0.16	115	25
health history (female reproductive system/hormone use)	0.16	62	25
skinfold measurement (triceps)	0.16	61	25
skinfold measurement (Sub caps)	0.16	60	25
paternal health history (diabetes)	0.16	63	26
demographics (siblings)	0.16	66	27
demographics (number of siblings)	0.16	100	27
health history (cancer)	0.16	71	28
cardiovascular health history (congestive heart failure)	0.16	73	29
physical ability	0.16	164	29
general physical/mental health	0.16	163	29
physical ability	0.16	162	29
health history (arthritis)	0.16	168	29
health history (stiffness/pain)	0.16	170	29
health history (stiffness/pain)	0.16	171	29
physical ability	0.16	166	29
mental well-being (intrapersonal support)	0.16	104	29
health history (arthritis)	0.16	238	29
health history (stiffness/swelling/pain)	0.16	259	29
health history (stiffness/swelling/pain)	0.16	267	29
mental well-being (intrapersonal support)	0.16	93	29
mental well-being (life satisfaction)	0.16	84	29
mental well-being (anger)	0.16	86	30
mental well-being (anger)	0.16	165	31
mental well-being (anger)	0.16	90	31
carotid distensibility measurements	0.16	95	32
carotid distensibility measurements	0.16	96	33
family health history (blood pressure)	0.16	159	34
paternal health history (stroke)	0.16	98	34
paternal health history (coronary heart disease/heart attack)	0.16	102	35
blood pressure measurements (sitting)	0.16	106	36
diet	0.16	110	37
nutrient measurements	0.16	111	38
metabolic panel results	0.16	119	39
diet (tea)	0.16	125	40
health history (stroke)	0.16	132	41
family health history (heart attack)	0.16	152	42
family health history (age at death)	0.16	153	43
health history (stroke)	0.16	157	44
health history (stroke/paralysis)	0.16	160	44
health history (dental)	0.16	169	45
health history (gallbladder)	0.16	172	46
health history (hepatitis)	0.16	173	47
health history (polyp in colon)	0.16	175	48
diet (baking)	0.16	185	49
family health history (stroke)	0.16	187	50
family health history (heart attack)	0.16	188	51
family health history (age at death)	0.16	189	51
smoking history (years not smoked)	0.16	195	52
medication (birth control)	0.16	200	53
family health history (stroke)	0.16	204	54
family health history (heart attack)	0.16	207	55
family health history (age at death)	0.16	208	55
diet	0.16	213	56
health history (vasectomy)	0.16	217	57
maternal health history (heart attack)	0.16	218	58
maternal health history (age at death)	0.16	220	59
maternal health history (high blood pressure)	0.16	222	60
family health history (stroke)	0.16	224	61
family health history (heart attack)	0.16	225	62
family health history (age at death)	0.16	229	62
carotid ultrasound measurements (near wall)	0.16	251	63
carotid ultrasound results (far wall measurements, plaque)	0.16	231	63
carotid ultrasound measurements	0.16	256	63
health history (hair loss)	0.16	232	64
health history (vasectomy)	0.16	234	65
family health history (stroke)	0.16	239	66
blood pressure measurements (ankle brachial)	0.16	240	67
family health history (age at death)	0.16	243	68
family health history (heart attack)	0.16	241	68
health history (chest pain)	0.16	244	69
health history (cardiac procedures)	0.16	247	69
health history (cardiac tests)	0.16	260	69
health history (sinuses)	0.16	250	70
hematology results	0.16	261	71
paternal health history (heart attack)	0.16	262	72
paternal health history (stroke)	0.16	263	73
paternal health history (high blood pressure)	0.16	266	73
paternal health history (cancer)	0.16	264	74
medication (hormone usage)	0.16	272	75
ultrasound results	0.16	274	76
drinking history	0.16	330	77
health history (nightime urination)	0.16	332	78
diet	0.16	380	79
diet	0.16	381	80
health history (hormone use)	0.16	397	81
ultrasound results	0.16	407	82
ultrasound results	0.16	408	83

## Sheet: 0.17
Cluster Name	Clustering threshold	Cluster Number	Cluster Group
cardiovascular health history (heart attack/stroke/coronary heart disease)	0.17	0	0
cardiovascular health history (cardiovascular disease)	0.17	1	1
Biomarker measurements	0.17	402	2
health history (hormone use)	0.17	401	2
health history (edema)	0.17	392	2
diet	0.17	389	2
Biomarker measurements	0.17	345	2
smoking history (cig/day)	0.17	343	2
hematology results (platelet count)	0.17	176	2
smoking history (nicotine use)	0.17	180	2
smoking history (secondhand smoke exposure)	0.17	182	2
medication (calcium channel blocker)	0.17	294	2
medication (hormone usage)	0.17	271	2
health history (cardiac tests)	0.17	260	2
smoking history (inhale)	0.17	254	2
NS	0.17	253	2
blood pressure measurements	0.17	252	2
hematology results (WBC count)	0.17	226	2
health history (cardiac procedures)	0.17	247	2
health history (chest pain)	0.17	244	2
diet/nutrient level measurements	0.17	34	2
diet/nutrient level measurements	0.17	32	2
diet	0.17	379	2
smoking history (general)	0.17	3	2
smoking history (cigar/cigarello)	0.17	6	3
health history (pregnancy)	0.17	223	4
demographics (parental education)	0.17	410	4
demographics (parental education)	0.17	167	4
demographics (occupation/education)	0.17	7	4
exercise/physical activity (work-related)	0.17	179	4
medication	0.17	403	4
drinking history	0.17	270	5
drinking history	0.17	8	5
exercise/physical activity	0.17	18	6
exercise/physical acivity	0.17	120	6
exercise/physical acivity	0.17	11	6
medication (cholesterol lowering)	0.17	112	7
medication (heart rhythm)	0.17	186	7
diet	0.17	376	7
medication (heart medication)	0.17	398	7
medication (prescription)	0.17	183	7
cardiovascular health history (congestive heart failure)	0.17	72	7
lung health history (emphysema)	0.17	16	7
medication (cholesterol lowering)	0.17	70	7
lung health history (cough/duration)	0.17	338	7
diet	0.17	17	7
lung health history (bronchitis)	0.17	20	7
lung health history (wheezing)	0.17	248	7
health history (cardiac surgery)	0.17	249	7
lung health history (lung disease)	0.17	67	7
health history (atrial fibrillation)	0.17	12	7
medication (heart medication)	0.17	339	7
lung health history (cough)	0.17	13	7
lung health history (asthma)	0.17	14	7
medication	0.17	202	7
lung health history (breathlessness)	0.17	258	7
maternal health history	0.17	15	8
paternal health history	0.17	19	9
cardiac health history (murmur)	0.17	22	10
cardiac health history (murmur)	0.17	23	11
diet	0.17	25	12
kidney function measurements (creatine, urea, dialysis)	0.17	26	13
cardiac ultrasound measurements (left atrium)	0.17	334	14
cardiac ultrasound measurements (aorta)	0.17	336	14
artery ultrasound measurements	0.17	372	14
kidney function measurements (uric acid measurements)	0.17	97	14
cardiac ultrasound measurements (left ventricular)	0.17	284	14
carotid ultrasound measurements (left/right internal carotid)	0.17	191	14
cardiac measurements (heart rate, blood flow measurements )	0.17	75	14
ultrasound results	0.17	279	14
ultrasound results	0.17	278	14
ultrasound results	0.17	277	14
hematology results (WBC count)	0.17	215	14
cornell voltage measurements	0.17	53	14
artery ultrasound measurements	0.17	246	14
blood lipid levels (HDL, Apolipoprotein)	0.17	28	14
cardiac ultrasound results (cardiac measurements)	0.17	103	14
ultrasound results	0.17	280	14
blood lipid levels (LDL, Apolipoprotein, total cholesterol)	0.17	29	15
health history (arthritis)	0.17	238	16
health history (stiffness/pain)	0.17	171	16
health history (thryoid)	0.17	174	16
diet/nutrient level measurements	0.17	118	16
medication	0.17	161	16
diet (dietary supplements)	0.17	109	16
diet (vitamin E)	0.17	108	16
health history (stiffness/pain)	0.17	170	16
medication	0.17	30	16
medication	0.17	94	16
medication	0.17	194	16
medication	0.17	127	16
cardiovascular health history (congestive heart failure)	0.17	73	16
health history (stiffness/swelling/pain)	0.17	267	16
health history (stiffness/swelling/pain)	0.17	259	16
health history (arthritis)	0.17	168	16
drinking history	0.17	331	17
diet	0.17	388	17
diet/nutrient level measurements	0.17	33	17
diet (broccoli)	0.17	121	17
diet (white bread)	0.17	122	17
diet (wine)	0.17	385	17
diet (biscuits)	0.17	123	17
diet	0.17	378	17
diet	0.17	377	17
diet	0.17	386	17
diet (visible fat on meat)	0.17	126	17
drinking history	0.17	236	17
carotid ultrasound measurements (right carotid)	0.17	233	18
carotid ultrasound results	0.17	45	18
carotid ultrasound measurements (near wall)	0.17	230	18
carotid ultrasound measurements (far wall)	0.17	216	18
carotid ultrasound measurements (near wall)	0.17	412	18
ultrasound results	0.17	273	18
carotid ultrasound measurements (right common carotid, wall width)	0.17	193	18
carotid ultrasound measurements (left common carotid, wall width)	0.17	192	18
carotid ultrasound measurements (left common carotid)	0.17	190	18
ultrasound measurements (near wall)	0.17	287	18
carotid ultrasound measurements (right common carotid)	0.17	184	18
carotid ultrasound results (plaque shadow)	0.17	101	18
ultrasound results	0.17	396	18
drinking history	0.17	46	19
blood pressure measurements (brachial)	0.17	47	20
blood pressure measurements (ankle brachial)	0.17	49	21
cardiocascular health history (perpheral artery disease)	0.17	50	21
family health history (diabetes)	0.17	51	22
maternal health history (high blood pressure)	0.17	214	23
maternal health history (stroke)	0.17	54	23
maternal health history (heart disease)	0.17	55	24
blood pressure measurements (sitting/diastolic)	0.17	57	25
blood pressure measurements (sitting/diastolic)	0.17	58	26
health history (stroke)	0.17	59	27
health history (stroke/paralysis)	0.17	64	27
medication	0.17	347	28
diet (dietary supplements)	0.17	382	28
health history (dental)	0.17	340	28
diet	0.17	387	28
diet/nutrient level measurements (fish/omega3)	0.17	383	28
health history (edema)	0.17	375	28
cardiac ultrasound measurements (output)	0.17	413	28
health history (gallbladder)	0.17	373	28
ultrasound results	0.17	318	28
health history (hormone use)	0.17	353	28
medication	0.17	411	28
health history (stroke)	0.17	390	28
ultrasound results	0.17	276	28
ultrasound results	0.17	409	28
ultrasound results	0.17	316	28
health history (head injury)	0.17	405	28
health history (hormone use)	0.17	399	28
health history (stroke)	0.17	404	28
health history (hormone use)	0.17	400	28
ultrasound results	0.17	282	28
health history (hormone use)	0.17	352	28
medication (aspirin)	0.17	406	28
medication (birth control)	0.17	199	28
diet (dietary supplements)	0.17	416	28
medication (birth control)	0.17	197	28
diet/nutrient level measurements	0.17	116	28
medication (birth control)	0.17	198	28
health history (cancer)	0.17	415	28
skinfold measurement (Sub caps)	0.17	60	28
health history (female reproductive system/hormone use)	0.17	62	28
skinfold measurement (triceps)	0.17	61	28
paternal health history (diabetes)	0.17	63	29
demographics (siblings)	0.17	66	30
demographics (number of siblings)	0.17	100	30
health history (cancer)	0.17	71	31
health history (cataracts)	0.17	181	32
physical ability	0.17	166	32
health history (head injury)	0.17	342	32
physical ability	0.17	164	32
general physical/mental health	0.17	163	32
health history (glaucoma)	0.17	351	32
health history (laser treatment)	0.17	350	32
health history (chest pain)	0.17	384	32
mental well-being (intrapersonal support)	0.17	93	32
mental well-being (life satisfaction)	0.17	84	32
physical ability	0.17	162	32
mental well-being (intrapersonal support)	0.17	104	32
mental well-being (anger)	0.17	86	33
mental well-being (anger)	0.17	90	34
mental well-being (anger)	0.17	165	34
carotid distensibility measurements	0.17	95	35
carotid distensibility measurements	0.17	96	36
paternal health history (stroke)	0.17	98	37
family health history (blood pressure)	0.17	159	37
paternal health history (coronary heart disease/heart attack)	0.17	102	38
blood pressure measurements (sitting)	0.17	106	39
health history (stroke/paralysis)	0.17	113	40
health history (stroke)	0.17	107	40
diet	0.17	110	41
nutrient measurements	0.17	111	42
demographics (household occupants)	0.17	115	43
demographics (marital status)	0.17	177	43
demographics (marital status/living situation)	0.17	323	43
diet/nutrient level measurements	0.17	117	44
metabolic panel results	0.17	119	45
diet (sugar)	0.17	374	46
diet (diet soft drinks)	0.17	124	46
diet (tea)	0.17	125	47
health history (stroke)	0.17	132	48
family health history (heart attack)	0.17	152	49
family health history (age at death)	0.17	153	50
health history (stroke)	0.17	157	51
health history (stroke/paralysis)	0.17	160	51
health history (dental)	0.17	169	52
health history (gallbladder)	0.17	172	53
health history (hepatitis)	0.17	173	54
health history (polyp in colon)	0.17	175	55
diet (baking)	0.17	185	56
family health history (stroke)	0.17	187	57
family health history (heart attack)	0.17	188	58
family health history (age at death)	0.17	189	58
smoking history (years not smoked)	0.17	195	59
medication (birth control)	0.17	200	60
family health history (stroke)	0.17	204	61
family health history (age at death)	0.17	208	62
family health history (heart attack)	0.17	207	62
diet	0.17	213	63
health history (vasectomy)	0.17	217	64
maternal health history (heart attack)	0.17	218	65
carotid ultrasound measurements	0.17	219	66
maternal health history (age at death)	0.17	220	67
maternal health history (high blood pressure)	0.17	222	68
family health history (stroke)	0.17	224	69
family health history (heart attack)	0.17	225	70
family health history (age at death)	0.17	229	70
carotid ultrasound measurements	0.17	256	71
carotid ultrasound results (far wall measurements, plaque)	0.17	231	71
carotid ultrasound measurements (near wall)	0.17	251	71
health history (hair loss)	0.17	232	72
health history (vasectomy)	0.17	234	73
family health history (stroke)	0.17	239	74
blood pressure measurements (ankle brachial)	0.17	240	75
family health history (heart attack)	0.17	241	76
family health history (age at death)	0.17	243	76
health history (cardiac procedures)	0.17	245	77
health history (sinuses)	0.17	250	78
hematology results	0.17	261	79
paternal health history (heart attack)	0.17	262	80
paternal health history (stroke)	0.17	263	81
paternal health history (high blood pressure)	0.17	266	81
paternal health history (cancer)	0.17	264	82
paternal health history (age at death)	0.17	265	83
medication (hormone usage)	0.17	272	84
ultrasound results	0.17	274	85
drinking history	0.17	330	86
health history (nightime urination)	0.17	332	87
drinking history	0.17	333	88
lung health history (cough/wheezing)	0.17	341	89
Biomarker measurements	0.17	346	90
diet	0.17	380	91
diet	0.17	381	92
health history (hormone use)	0.17	397	93
ultrasound results	0.17	407	94
ultrasound results	0.17	408	95

[truncated: 8 more sheets: 0.18, 0.19, 0.2, 0.21, 0.22, 0.23, 0.24, 0.25]
