# Supplementary material for: Correlation Analysis of Variables From the Atherosclerosis Risk in Communities Study
Source: Front Pharmacol. 2022 Jul 11;13:883433. doi: 10.3389/fphar.2022.883433 (PMC9310100; doi:10.3389/fphar.2022.883433)
Supplement: Supplementary file 3 [file Table1.XLSX]

## Sheet: Cluster Information
Cluster Number	Cluster Description		11_1_21 relatedness category	Relatedness Category	Relatedness Score	Cluster Size
0	cardiovascular health history (heart attack/stroke/coronary heart disease)			R	4.00548	192
1	cardiovascular health history (cardiovascular disease)			R	10.5023	219
2	data/specimen collection/processing details (fasting)			HR	21.1733	4
3	smoking history (general)			HR	21.9339	47
4	NA			UR	5.37665	634
5	data/specimen collection and processing details			R	23.9682	4
6	smoking history (cigar/cigarello)			HR	22.8413	10
7	demographics (occupation/education)			R	6.14016	15
8	drinking history			HR	11.2696	42
9	data/specimen collection/processing details	different methods of data collection from different forms?	?	R	45.9912	3
10	NA			UR	16.9811	2
11	exercise/physical acivity			R	5.81395	2
12	health history (atrial fibrillation)			HR	30.1023	3
13	lung health history (cough)			HR	27.7577	7
14	lung health history (asthma)			HR	24.7326	9
15	maternal health history			HR	23.4999	10
16	lung health history (emphysema)			HR	35.119	2
17	diet			HR	45	2
18	exercise/physical activity			HR	21.7084	8
19	paternal health history			HR	22.3781	8
20	lung health history (bronchitis)			HR	40.6322	2
21	NA			NA	0	1
22	cardiac health history (murmur)			HR	43.913	2
23	cardiac health history (murmur)			HR	43.8889	2
24	data/specimen collection/processing details (blood sample)			HR	34.2742	2
25	diet			HR	13.2099	2
26	kidney function measurements (creatine, urea, dialysis)			R	13.4834	6
27	blood lipid levels (triglycerides, specimen appearance)			HR	26.6589	13
28	blood lipid levels (HDL, Apolipoprotein)			R	29.5553	22
29	blood lipid levels (LDL, Apolipoprotein, total cholesterol)			R	22.7347	23
30	medication			R	5.48327	6
31	data/specimen collection/processing details (quality)			R	26.3021	2
32	diet/nutrient level measurements			R	7.76109	177
33	diet/nutrient level measurements			R	10.1033	3
34	diet/nutrient level measurements			R	17.0839	7
35	data/specimen collection/processing details (ultrasound quality)			R	21.6667	5
36	data/specimen collection/processing details (ultrasound quality)			R	15.0874	7
37	data/specimen collection/processing details (ultrasound quality)			R	14.4444	6
38	data/specimen collection/processing details (ultrasound quality)			R	21.6667	5
39	data/specimen collection/processing details (ultrasound quality)			R	21.6667	5
40	data/specimen collection/processing details (ultrasound quality)			R	21.6667	5
41	data/specimen collection/processing details (ultrasound quality)			R	22.4074	10
42	data/specimen collection/processing details (ultrasound quality)			R	22.4074	10
43	data/specimen collection/processing details (ultrasound quality)			R	21.6667	5
44	data/specimen collection/processing details (ultrasound quality)			R	21.6667	5
45	carotid ultrasound results			HR	15.6846	9
46	drinking history			HR	17.6716	22
47	blood pressure measurements (brachial)			HR	44.7706	3
48	NA			NA	0	1
49	blood pressure measurements (ankle brachial)			E	5.71429	2
50	cardiocascular health history (perpheral artery disease)			E	44.8276	2
51	family health history (diabetes)			HR	23.8843	6
52	NA			NA	0	2
53	cornell voltage measurements			HR	18.2804	10
54	maternal health history (stroke)			HR	30.9538	5
55	maternal health history (heart disease)			HR	18.8699	5
56	data/specimen collection/processing details (fasting)			HR	16.6667	3
57	blood pressure measurements (sitting/diastolic)			E	44.1573	3
58	blood pressure measurements (sitting/diastolic)			E	44.1573	3
59	health history (stroke)			HR	15.2075	18
60	skinfold measurement (Sub caps)			E	50	2
61	skinfold measurement (triceps)			E	50	2
62	health history (female reproductive system/hormone use)			R	13.0198	84
63	paternal health history (diabetes)			HR	26.8978	6
64	health history (stroke/paralysis)			HR	27.5352	2
65	NA			UR	4.23729	2
66	demographics (siblings)			HR	21.7391	2
67	lung health history (lung disease)			E	42.0177	2
68	NA			NA	0	1
69	health insurance	one variable has more of an explanation fo the question		E	17.4762	2
70	medication (cholesterol lowering)			E	6.04167	2
71	health history (cancer)			HR	20.7826	8
72	cardiovascular health history (congestive heart failure)			E	49.7104	2
73	cardiovascular health history (congestive heart failure)			E	42.1378	3
74	administrative			E	44.7917	3
75	cardiac measurements (heart rate, blood flow measurements )			R	7.4371	21
76	NA			NA	0	1
77	NA			NA	0	1
78	NA			NA	0	1
79	NA			NA	0	1
80	NA			NA	0	1
81	minnesota code			E	32.6923	2
82	minnesota code			E	43.0833	2
83	NA			NA	0	1
84	mental well-being (life satisfaction)			HR	24.6721	2
85	NA			NA	0	1
86	mental well-being (anger)			E	32.1237	4
87	NA			NA	0	1
88	NA			NA	0	1
89	NA			NA	0	1
90	mental well-being (anger)	R - anger about different siutaitons	R	HR	17.0732	2
91	NA			NA	0	1
92	NA			NA	0	1
93	mental well-being (intrapersonal support)			R	25.4918	2
94	medication			R	8.58116	6
95	carotid distensibility measurements			R	21.5152	102
96	carotid distensibility measurements			R	3.125	2
97	kidney function measurements (uric acid measurements)			E	35	2
98	paternal health history (stroke)			HR	25.8679	3
99	data/specimen collection/processing details (ultrasound quality)			HR	41.6667	2
100	demographics (number of siblings)			R	22.292	9
101	carotid ultrasound results (plaque shadow)			HR	31.8748	4
102	paternal health history (coronary heart disease/heart attack)			HR	18.0354	5
103	cardiac ultrasound results (cardiac measurements)			HR	33.5332	42
104	mental well-being (intrapersonal support)			HR	27.6557	2
105	data/specimen collection/processing details (fasting)			HR	42.8075	3
106	blood pressure measurements (sitting)			E	44.5188	3
107	health history (stroke)			HR	15.4022	18
108	diet (vitamin E)			HR	41.1674	4
109	diet (dietary supplements)			HR	14.2433	24
110	diet			HR	15.0903	3
111	nutrient measurements			R	7.69231	2
112	medication (cholesterol lowering)			HR	16.9222	8
113	health history (stroke/paralysis)			HR	27.5352	2
114	data/specimen collection/processing details (blood sample)			HR	34.2742	2
115	demographics (household occupants)			E	20.4762	3
116	diet/nutrient level measurements	Dietary intake and nutrient levels HR?	?	R	36.1965	3
117	diet/nutrient level measurements	Dietary intake and nutrient levels HR?	?	R	37.1585	2
118	diet/nutrient level measurements	Dietary intake and nutrient levels HR?	?	R	40.8945	4
119	metabolic panel results			R	21.2596	4
120	exercise/physical acivity			R	0	2
121	diet (broccoli)			E	45.7207	3
122	diet (white bread)			E	49.7076	3
123	diet (biscuits)			E	49.3827	3
124	diet (diet soft drinks)			E	49.4595	3
125	diet (tea)			E	48.9929	3
126	diet (visible fat on meat)			E	49.5614	3
127	medication			R	3.30487	3
128	retinal exam results			R	9.38734	126
129	retinal exam results (pigmentation)			HR	12.7451	2
130	data/specimen collection/processing details (blood sample)			HR	33.1036	4
131	retinal exam results			E	38.2759	3
132	health history (stroke)			HR	35.9513	2
133	retinal exam results (vessel measurements)			E	15.7895	2
134	retinal exam results (vessel measurements)			E	15.7895	2
135	retinal exam results (vessel measurements)			E	15.7895	2
136	retinal exam results (vessel measurements)			E	50	2
137	retinal exam results (vessel measurements)			E	50	2
138	retinal exam results (vessel measurements)			E	50	2
139	retinal exam results (vessel measurements)			E	50	2
140	retinal exam results (vessel measurements)			E	50	2
141	retinal exam results (vessel measurements)			E	50	2
142	retinal exam results (vessel measurements)			E	50	2
143	retinal exam results (vessel measurements)			E	50	2
144	retinal exam results (vessel measurements)			E	50	2
145	retinal exam results (vessel measurements)			E	50	2
146	retinal exam results (vessel measurements)			E	50	2
147	retinal exam results (vessel measurements)			E	50	2
148	retinal exam results (vessel measurements)			E	50	2
149	retinal exam results (vessel measurements)			E	50	2
150	retinal exam results (vessel measurements)			E	50	2
151	retinal exam results (vessel measurements)			E	50	2
152	family health history (heart attack)			HR	40.404	2
153	family health history (age at death)			HR	9.52381	2
154	administrative			R	6.25	2
155	administrative			R	5.26316	2
156	NA			NA	0	1
157	health history (stroke)			R	15.3903	18
158	data/specimen collection/processing details (fasting)			HR	17.631	7
159	family health history (blood pressure)			HR	34.0094	2
160	health history (stroke/paralysis)			HR	30.3542	2
161	medication			R	16.2405	13
162	physical ability	unsure - all measures of physical ability but different areas (eating, dressing, getting out of bed, walking)		HR	6.37333	5
163	general physical/mental health			R	6.98748	57
164	physical ability	unsure - assistive devices but in different areas (eating, dressing)		HR	11.552	2
165	mental well-being (anger)			R	17.0732	2
166	physical ability		HR	E	30.8683	2
167	demographics (parental education)		HR	R	50	2
168	health history (arthritis)			E	48.6301	2
169	health history (dental)			R	6.87112	10
170	health history (stiffness/pain)			HR	16.9399	2
171	health history (stiffness/pain)			HR	16.9399	2
172	health history (gallbladder)			HR	20.5377	4
173	health history (hepatitis)			HR	39.1026	2
174	health history (thryoid)			R	28.5444	3
175	health history (polyp in colon)			E	32.1678	2
176	hematology results (platelet count)			E	46.6667	4
177	demographics (marital status)			E	35.3903	3
178	NA			NA	0	1
179	exercise/physical activity (work-related)			HR	28.671	4
180	smoking history (nicotine use)			HR	34.38	2
181	health history (cataracts)			HR	33.8924	3
182	smoking history (secondhand smoke exposure)			E	48.2824	2
183	medication (prescription)			R	50	10
184	carotid ultrasound measurements (right common carotid)			HR	46.431	6
185	diet (baking)			R	18.7518	3
186	medication (heart rhythm)			E	50	3
187	family health history (stroke)			HR	35.9513	2
188	family health history (heart attack)			HR	39.899	2
189	family health history (age at death)			R	9.52381	2
190	carotid ultrasound measurements (left common carotid)			HR	43.9982	6
191	carotid ultrasound measurements (left/right internal carotid)			HR	39.4851	12
192	carotid ultrasound measurements (left common carotid, wall width)			HR	45.5555	6
193	carotid ultrasound measurements (right common carotid, wall width)			HR	45.5555	6
194	medication			E	50	2
195	smoking history (years not smoked)			HR	35.7143	2
196	data/specimen collection/processing details (blood glucose test)			E	19.1667	2
197	medication (birth control)			HR	38.645	4
198	medication (birth control)			HR	38.645	4
199	medication (birth control)			HR	36.5694	5
200	medication (birth control)			HR	26.1111	4
201	NA			NA	0	1
202	medication			R	47.6852	9
203	data/specimen collection/processing details (ultrasound date)			E	42.5373	13
204	family health history (stroke)			HR	35.9513	2
205	data/specimen collection/processing details (ultrasound date)			E	38.0952	22
206	data/specimen collection/processing details (ultrasound quality)			R	15.8295	52
207	family health history (heart attack)			HR	40.404	2
208	family health history (age at death)	One is dependent on the other (age at death and still alive)		HR	9.52381	2
209	NA		HR	UR	26.686	5
210	data/specimen collection/processing details (quality)			E	25	3
211	data/specimen collection/processing details (date)			E	37.5	11
212	data/specimen collection/processing details (quality)			R	25	2
213	diet	Brand woud be related to type of fat in baking. Different brands of butter, margarine, oil, etc.	R	UR	7.89474	2
214	maternal health history (high blood pressure)			HR	30.1413	2
215	hematology results (WBC count)			R	17.1875	2
216	carotid ultrasound measurements (far wall)			HR	46.1538	2
217	health history (vasectomy)			HR	25.6422	3
218	maternal health history (heart attack)			HR	28.8462	2
219	carotid ultrasound measurements			HR	33.1436	10
220	maternal health history (age at death)			HR	11.2245	2
221	NA			NA	0	1
222	maternal health history (high blood pressure)			HR	30.1413	2
223	health history (pregnancy)			HR	23.9035	2
224	family health history (stroke)			HR	35.9513	2
225	family health history (heart attack)			HR	40.404	2
226	hematology results (WBC count)			E	47.619	3
227	data/specimen collection/processing details (quality)			R	25	2
228	data/specimen collection/processing details (quality)			R	25	2
229	family health history (age at death)	One is dependent on the other (age at death and still alive)		HR	9.52381	2
230	carotid ultrasound measurements (near wall)			HR	46.2033	2
231	carotid ultrasound results (far wall measurements, plaque)			R	27.6233	5
232	health history (hair loss)			R	22.1154	2
233	carotid ultrasound measurements (right carotid)			HR	46.9697	2
234	health history (vasectomy)			HR	11.3636	2
235	NA			NA	0	1
236	drinking history			HR	27.6395	5
237	health insurance			HR	14.7794	2
238	health history (arthritis)			HR	46.4286	2
239	family health history (stroke)			HR	35.9513	2
240	blood pressure measurements (ankle brachial)			HR	33.8918	7
241	family health history (heart attack)			HR	40.404	2
242	NA			NA	0	1
243	family health history (age at death)	One is dependent on the other (age at death and still alive)		HR	9.52381	2
244	health history (chest pain)			R	10.2424	5
245	health history (cardiac procedures)	(pacemaker dependency after coronary bypess	HR	R	39.1063	3
246	artery ultrasound measurements			R	32.2674	2
247	health history (cardiac procedures)			R	12.4434	2
248	lung health history (wheezing)			HR	40.4616	2
249	health history (cardiac surgery)	Maybe only R? history of bypass vs surgery on heart or arteries		HR	16.5179	2
250	health history (sinuses)			HR	47.7273	2
251	carotid ultrasound measurements (near wall)			HR	45.5645	2
252	blood pressure measurements	HR? Systolic/diastolic pressure in same person		R	44.8059	2
253	NS			NA	0	1
254	smoking history (inhale)			E	45.3714	3
255	administrative (codes)			UR	0	2
256	carotid ultrasound measurements			R	23.7374	2
257	administrative (codes)			UR	0	2
258	lung health history (breathlessness)			HR	39.705	2
259	health history (stiffness/swelling/pain)			R	26.8208	3
260	health history (cardiac tests)			R	28.4028	2
261	hematology results			R	16.5	5
262	paternal health history (heart attack)			HR	38.3333	2
263	paternal health history (stroke)			HR	36.8182	2
264	paternal health history (cancer)			HR	35.2128	2
265	paternal health history (age at death)	One is dependent on the other (age at death and still alive)		HR	10.3774	2
266	paternal health history (high blood pressure)			HR	24.2456	2
267	health history (stiffness/swelling/pain)			R	26.8208	3
268	administrative (codes)			UR	0	2
269	data/specimen collection/processing details (MRI exclusion criteria)		R	UR	8.46379	4
270	drinking history			R	12.5	2
271	medication (hormone usage)			R	5.35737	4
272	medication (hormone usage)			R	30.565	4
273	ultrasound results			R	28.1834	3
274	ultrasound results			R	37.5	4
275	NA			NA	0	1
276	ultrasound results			R	32.3257	13
277	ultrasound results			R	13.1271	2
278	ultrasound results			R	34.6548	3
279	ultrasound results			R	11.6402	8
280	ultrasound results			R	34.3963	8
281	data/specimen collection/processing details (quality)			R	19.8547	2
282	ultrasound results			R	37.5	2
283	data/specimen collection/processing details			HR	20.8333	2
284	cardiac ultrasound measurements (left ventricular)			R	27.1763	16
285	data/specimen collection/processing details (transfusion)			HR	45.9402	2
286	administrative (transfer)			HR	13.3929	2
287	ultrasound measurements (near wall)			HR	46.2033	2
288	sleep study			R	11.2847	64
289	sleep study			HR	32.5203	2
290	sleep study			HR	32.5203	2
291	sleep study			R	15.5911	29
292	sleep study			HR	38.8799	2
293	sleep study			HR	32.7473	2
294	medication (calcium channel blocker)	calcium channel blocker referred to as CCB in one variable		HR	0	2
295	sleep study			R	35.304	3
296	data/specimen collection/processing details (quality)			R	29.6078	2
297	sleep study			R	22.6263	2
298	data/specimen collection/processing details (quality)			R	29.021	3
299	sleep study		R	UR	14.6825	2
300	data/specimen collection/processing details (quality)			R	33.8667	2
301	NA			NA	0	1
302	NA			NA	0	1
303	data/specimen collection/processing details (quality)			R	30.9186	2
304	data/specimen collection/processing details (quality)			R	36.7211	4
305	data/specimen collection/processing details (quality)			R	26.0107	7
306	sleep study			E	16.4983	2
307	data/specimen collection/processing details (quality)		R	UR	37.5	2
308	sleep study			R	32.8846	2
309	sleep study			R	32.8262	6
310	sleep study			HR	25.0663	10
311	data/specimen collection/processing details (quality)		R	UR	37.3941	2
312	sleep study			R	28.5714	2
313	sleep study			R	43.8138	2
314	sleep study			R	41.9101	2
315	sleep study			R	39.9621	2
316	ultrasound results			R	27.9463	5
317	sleep study			R	25.2451	2
318	ultrasound results			R	28.4141	6
319	sleep study		HR	R	42.6087	2
320	sleep study		HR	R	42.7273	2
321	sleep study			R	29.3249	2
322	sleep study			R	15.6566	2
323	demographics (marital status/living situation)			R	1.94805	2
324	data/specimen collection/processing details (patient comfort)			R	27.974	3
325	data/specimen collection/processing details (patient comfort)			R	26.97	2
326	NA			UR	0	2
327	sleep study			R	30.0637	4
328	NA			NA	0	1
329	data/specimen collection/processing details			R	23.7302	2
330	drinking history			E	26.2443	2
331	drinking history			E	47.0439	2
332	health history (nightime urination)			E	0	2
333	drinking history			E	50.89	2
334	cardiac ultrasound measurements (left atrium)			HR	50	2
335	data/specimen collection/processing details (quality)	different branches of arteriole	HR	UR	11.7241	2
336	cardiac ultrasound measurements (aorta)			HR	50	2
337	sleep study			HR	28.8934	2
338	lung health history (cough/duration)			R	37.3249	2
339	medication (heart medication)	different wording in variables		R	0	2
340	health history (dental)			HR	38.8521	2
341	lung health history (cough/wheezing)			R	16.4	2
342	health history (head injury)		HR	R	51.862	2
343	smoking history (cig/day)			E	50	2
344	administrative (forms)			UR	6.45161	2
345	Biomarker measurements			E	36.6667	5
346	Biomarker measurements			E	38.6905	8
347	medication		R	UR	43.75	2
348	sleep study (apnea)			R	43.5081	3
349	administrative			UR	2.18978	2
350	health history (laser treatment)			E	50	2
351	health history (glaucoma)			E	50	2
352	health history (hormone use)			E	50	2
353	health history (hormone use)			E	50	2
354	retinal exam results (vessel measurements)			HR	23.0263	2
355	retinal exam results (vessel measurements)			HR	50	2
356	retinal exam results (vessel measurements)			HR	25.188	2
357	retinal exam results (vessel measurements)			HR	50	2
358	retinal exam results (vessel measurements)			HR	50	2
359	retinal exam results (vessel measurements)			HR	50	2
360	retinal exam results (vessel measurements)			HR	50	2
361	retinal exam results (vessel measurements)			HR	50	2
362	retinal exam results (vessel measurements)			HR	50	2
363	retinal exam results (vessel measurements)			HR	50	2
364	retinal exam results (vessel measurements)			HR	50	2
365	retinal exam results (vessel measurements)			HR	50	2
366	retinal exam results (vessel measurements)			HR	50	2
367	retinal exam results (vessel measurements)			HR	50	2
368	retinal exam results (vessel measurements)			HR	50	2
369	retinal exam results (vessel measurements)			HR	50	2
370	retinal exam results (vessel measurements)			HR	50	2
371	retinal exam results (vessel measurements)			HR	50	2
372	artery ultrasound measurements			R	37.0892	2
373	health history (gallbladder)			HR	21.4871	2
374	diet (sugar)			E	50	2
375	health history (edema)		HR	R	41.3542	2
376	diet			HR	45	2
377	diet			E	49.6732	2
378	diet			E	50	3
379	diet			E	50	2
380	diet			E	49.5935	3
381	diet			E	50	2
382	diet (dietary supplements)			R	36.5196	2
383	diet/nutrient level measurements (fish/omega3)			R	11.3001	2
384	health history (chest pain)	duration vs severity of pain? HR?		R	36.1111	2
385	diet (wine)			E	24.2017	2
386	diet			E	48.8636	2
387	diet			E	49.359	2
388	diet			E	49.6429	2
389	diet			E	48.4375	2
390	health history (stroke)			HR	27.7569	2
391	data/specimen collection/processing details (EMG)			R	24.4361	2
392	health history (edema)	would left and right ankle be highly related? Could have injured but could also have a condition causing edema	?	R	41.369	2
393	administrative (codes)			E	50	5
394	data/specimen collection/processing details (EEG)			R	29.8942	2
395	data/specimen collection/processing details (EEG)			R	29.8942	2
396	ultrasound results			R	28.0068	5
397	health history (hormone use)	?		R	0	2
398	medication (heart medication)		HR	R	25.6854	2
399	health history (hormone use)			E	50	2
400	health history (hormone use)			E	50	2
401	health history (hormone use)	?		R	0	2
402	Biomarker measurements			R	33.3333	2
403	medication	unsure - could be HR because a patient may be taking multiple medications for the same condition	?	R	50	2
404	health history (stroke)			HR	33.7569	2
405	health history (head injury)			R	28.2361	2
406	medication (aspirin)	Are start and stop of medication HR?	?	R	46.2253	2
407	ultrasound results			R	13.7387	3
408	ultrasound results			R	28.3524	6
409	ultrasound results			R	37.5	4
410	demographics (parental education)			R	48.5676	2
411	medication			R	42.75	2
412	carotid ultrasound measurements (near wall)			R	44.7706	4
413	cardiac ultrasound measurements (output)			R	5.76023	4
414	NA			UR	0	2
415	health history (cancer)			E	32.2917	2
416	diet (dietary supplements)			R	32.1719	2
417	NA			NA	0	1
418	NA			NA	0	1

## Sheet: Cluster Info + Variables
Cluster Number	0	1	2	3	4	5	6	7	8	9	10	11	12	13	14	15	16	17	18	19	20	21	22	23	24	25	26	27	28	29	30	31	32	33	34	35	36	37	38	39	40	41	42	43	44	45	46	47	48
Cluster Description	cardiovascular health history (heart attack/stroke/coronary heart disease)	cardiovascular health history (cardiovascular disease)	data/specimen collection/processing details (fasting)	smoking history (general)	NA	data/specimen collection and processing details	smoking history (cigar/cigarello)	demographics (occupation/education)	drinking history	data/specimen collection/processing details	NA	exercise/physical acivity	health history (atrial fibrillation)	lung health history (cough)	lung health history (asthma)	maternal health history	lung health history (emphysema)	diet	exercise/physical activity	paternal health history	lung health history (bronchitis)	NA	cardiac health history (murmur)	cardiac health history (murmur)	data/specimen collection/processing details (blood sample)	diet	kidney function measurements (creatine, urea, dialysis)	blood lipid levels (triglycerides, specimen appearance)	blood lipid levels (HDL, Apolipoprotein)	blood lipid levels (LDL, Apolipoprotein, total cholesterol)	medication	data/specimen collection/processing details (quality)	diet/nutrient level measurements	diet/nutrient level measurements	diet/nutrient level measurements	data/specimen collection/processing details (ultrasound quality)	data/specimen collection/processing details (ultrasound quality)	data/specimen collection/processing details (ultrasound quality)	data/specimen collection/processing details (ultrasound quality)	data/specimen collection/processing details (ultrasound quality)	data/specimen collection/processing details (ultrasound quality)	data/specimen collection/processing details (ultrasound quality)	data/specimen collection/processing details (ultrasound quality)	data/specimen collection/processing details (ultrasound quality)	data/specimen collection/processing details (ultrasound quality)	carotid ultrasound results	drinking history	blood pressure measurements (brachial)	NA
Relatedness Category	R	R	HR	HR	UR	R	HR	R	HR	R	UR	R	HR	HR	HR	HR	HR	HR	HR	HR	HR	NA	HR	HR	HR	HR	R	HR	R	R	R	R	R	R	R	R	R	R	R	R	R	R	R	R	R	HR	HR	HR	NA
Relatedness Score	4.00548	10.5023	21.1733	21.9339	5.37665	23.9682	22.8413	6.14016	11.2696	45.9912	16.9811	5.81395	30.1023	27.7577	24.7326	23.4999	35.119	45	21.7084	22.3781	40.6322	0	43.913	43.8889	34.2742	13.2099	13.4834	26.6589	29.5553	22.7347	5.48327	26.3021	7.76109	10.1033	17.0839	21.6667	15.0874	14.4444	21.6667	21.6667	21.6667	22.4074	22.4074	21.6667	21.6667	15.6846	17.6716	44.7706	0
Cluster Size	192	219	4	47	634	4	10	15	42	3	2	2	3	7	9	10	2	2	8	8	2	1	2	2	2	2	6	13	22	23	6	2	177	3	7	5	7	6	5	5	5	10	10	5	5	9	22	3	1
Variables	Follow up time for MI07 (days)	Hypertension lowering medication within past 2 weeks [Cohort, Exam 1]	Fasting time of 12 hours or more [Cohort, Exam 1]	Ever smoked cigarettes [Cohort, Exam 1]	[Participant information]. FTRX23 [Fasting/Tracking Form, exam 1]	[Preliminary measurement]. Time of day [Siting Blood Pressure, exam 1]	Cigar/cigarillo smoking status [Cohort, Exam 1]	Highest grade or year of school completed. Q54 [Home Interview, exam 1]	[Alcohol]. During the past 24 hours, how many drinks have you had? Q99 [Dietary Intake Form, exam 1]	[Administrative information]. Method of data collection. Q74 [Respiratory Symptoms and Physical Activity Form, exam 1]	[Vital status]. Information obtained from: Annual Follow-up Questionnaire Form [AFUA]	[Other activities]. How many minutes do you walk and/or bicycle per day and from work to shopping? Q70 [Respiratory Symptoms and Physical Activity Form, exam 1]	Incident atrial fibrillation event as determined by any source by 31DECYY.	[Cough]. Do you usually cough at all on getting up, or first thing in the morning? Q3 [Respiratory Symptoms and Physical Activity Form, exam 1]	[Asthma]. Ever had asthma? Q35 [Respiratory Symptoms and Physical Activity Form, exam 1]	Age of natural mother. Q17 [Home Interview, exam 1]	[Bronchitis]. Age emphysema started. Q34 [Respiratory Symptoms and Physical Activity Form, exam 1]	[Other dietary items]. How many years on the special diet. Q82 [Dietary Intake Form, exam 1]	[Leisure time]. In comparison with others of your own age do you think your physical activity during leisure time is. Q65 [Respiratory Symptoms and Physical Activity Form, exam 1]	Age of natural father. Q25 [Home Interview, exam 1]	[Bronchitis]. Age chronic bronchitis started. Q30 [Respiratory Symptoms and Physical Activity Form, exam 1]	Prevalent myocardial infarction from adjudicated electrocardiograms [Cohort, Exam 1]	[Cardio Pulmonary]. Diastolic murmur grade. Q18a [Physical Examination Form, exam 1]	[Cardio Pulmonary]. Systolic murmur grade. Q17a [Physical Examination Form, exam 1]	[Blood processing]. Time Specimen was placed in freezer [Venipuncture Form, VENA, Cohort Visit 1]	[Other dietary items]. Code of first other food. Q68 [Dietary Intake Form, exam 1]	Creatinine (mg/dL). Q9 [Clinical Chemistry Lab, exam 1]	Total triglycerides In SI units [Cohort, Exam 1]	LIPX03 [Lipid Lab, exam 1]	Apolipoprotein B (mg/dL) [Lipid Lab, exam 1]	[Medication records].	Reading center quality code (computer generated) [Pulmonary Function Test, exam 1]	Fatty acid 18:1 [g] [Nutrients, ANUT, exam 1]	Total carotenoid [IU] [Nutrients, ANUT, exam 1]	[Beverages]. In the past year, how often on average did you consume... Coffee, not decaffeinated; 1 c. Q61 [Dietary Intake Form, exam 1]	QC02QL4: reader-rated qual. of interf 4 [Ultrasound Raw Data, exam 1]	QC01QL3: reader-rated qual. of interf 3 [Ultrasound Raw Data, exam 1]	RINTQL3: reader-rated qual. of interf 3 [Ultrasound Raw Data, exam 1]	ROPTCALF: calibration factor X.Xxxx [Ultrasound Raw Data, exam 1]	LINTQL3: reader-rated qual. of interf 3 [Ultrasound Raw Data, exam 1]	POPQL5: reader-rated qual. of interf 5 [Ultrasound Raw Data, exam 1]	LPOSQL5: reader-rated qual. of interf 5 [Ultrasound Raw Data, exam 1]	RANTQL2: reader-rated qual. of interf 2 [Ultrasound Raw Data, exam 1]	LOPTQL5: reader-rated qual. of interf 5 [Ultrasound Raw Data, exam 1]	RBIFQL5: reader-rated qual. of interf 5 [Ultrasound Raw Data, exam 1]	Plaque/shadowing in either common [Cohort, Exam 1]	Alcohol [%kcal] [Nutrients, ANUT, exam 1]	Average brachial systolic blood pressure [Ankle Brachial BP (Blood Pressure - ultrasound work station), exam 1]	Atrial flutter [Atrial Fibrillation, exam 1]
	Follow-up DPP strokes (days)	Medications which secondarily affect cholesterol: using 2004 Med. Code, visit 1 [Cohort, Exam 1]	[Fasting information]. When was the last time you ate or drank anything except water? Day last ate or drank. Q2a [Fasting/Tracking Form, exam 1]	Have you ever smoked cigarettes? Q28 [Home Interview, exam 1]	Race (from FTRA23) [Cohort, Exam 1]	[Blood drawing]. Time of blood draw [Venipuncture Form, VENA, Cohort Visit 1]	Ever smoked cigars or cigarillos regularly? Q44 [Home Interview, exam 1]	Education level, definition 2 [Cohort, Exam 1]	[Alcohol]. How many glasses of wine do you usually have per week? (4 oz. glasses; round down). Q96 [Dietary Intake Form, exam 1]	[Administration information]. Method of data collection. Q24 [Siting Blood Pressure, exam 1]	[Vital status]. Final vital status [Annual Follow-up Questionnaire Form, AFUA]	Physical activity during leisure time excluding sport [Cohort, Exam 1]	[Hospital information]. Are any of the following conditions documented as having been present within four weeks prior to or during this hospitalization? Atrial fibrillation. Q29c [Cohort Stroke Abstraction Form]	[Cough]. Do you usually cough at all during the rest of the day or at night? Q4 [Respiratory Symptoms and Physical Activity Form, exam 1]	[Asthma]. Age asthma started Q37 [Respiratory Symptoms and Physical Activity Form, exam 1]	Age of natural mother at death. Q13 [Home Interview, exam 1]	[Emphysema]. Ever had emphysema? Q31 [Respiratory Symptoms and Physical Activity Form, exam 1]	[Other dietary items]. Are you currently on a special diet? Q81 [Dietary Intake Form, exam 1]	[Sports]. Exercise or play sports? Q47 [Respiratory Symptoms and Physical Activity Form, exam 1]	Age of natural father at death. Q21 [Home Interview, exam 1]	[Bronchitis]. Ever had chronic bronchitis? Q27 [Respiratory Symptoms and Physical Activity Form, exam 1]		[Cardio Pulmonary]. Diastolic murmur? Q18 [Physical Examination Form, exam 1]	[Cardio Pulmonary]. Systolic murmur? Q17 [Physical Examination Form, exam 1]	[Blood processing]. Time specimen tubes 1,3 were spun [Venipuncture Form, VENA, Cohort Visit 1]	[Other dietary items]. Are there any other foods that you usually eat at least twice per week such as tortillas, prunes, or avocado? Do not include dry spices nor something that has been listed previously. Q67 [Dietary Intake Form, exam 1]	Creatinine (mg Per dL) Dec Pt Req. Q8 [Clinical Chemistry Lab, exam 2]	Visit 2, total triglycerides in Mmol/L [Cohort, Exam 2]	HDL cholesterol (recalibrated lipid) [Cohort, Exam 1]	Total cholesterol (mg/dL) [Lipid Lab, exam 1]	[Interview]. During the past two weeks, did you take any Aspirin, Alka-Seltzer, a cold medicine, or a headache powder? Q9 [Medication Survey Form, exam 1]	Quality code of technician (1-5). Q42 [Pulmonary Function Test, exam 1]	Total calorie intake in Kcal/day from dietary and ethanol consumption, but excluding other calories from alcoholic beverages [Cohort, Exam 1]	Total vitamin A [IU] [Nutrients, ANUT, exam 1]	[Beverages]. In the past year, how often on average did you consume... Coffee, not decaffeinated; 1 c. Q61 [Dietary Intake Form (DTIC), exam 3]	QC02QL2: reader-rated qual. of interf 2 [Ultrasound Raw Data, exam 1]	QC01QL5: reader-rated qual. of interf 5 [Ultrasound Raw Data, exam 1]	RINTQL5: reader-rated qual. of interf 5 [Ultrasound Raw Data, exam 1]	ROPTQL5: reader-rated qual. of interf 5 [Ultrasound Raw Data, exam 1]	LINTQL5: reader-rated qual. of interf 5 [Ultrasound Raw Data, exam 1]	POPQL3: reader-rated qual. of interf 3 [Ultrasound Raw Data, exam 1]	LPOSQL4: reader-rated qual. of interf 4 [Ultrasound Raw Data, exam 1]	RANTQL5: reader-rated qual. of interf 5 [Ultrasound Raw Data, exam 1]	LOPTQL4: reader-rated qual. of interf 4 [Ultrasound Raw Data, exam 1]	RBIFQL4: reader-rated qual. of interf 4 [Ultrasound Raw Data, exam 1]	Plaque in either common carotid [Cohort, Exam 1]	Usual ethanol intake in [g/wk] [Cohort, Exam 1]	2nd Brachial systolic blood pressure reading [Ankle Brachial BP (Blood Pressure - ultrasound work station), exam 1]
	Event year for INDP07	[First blood pressure measurement]. 1st systolic. Q12 [Siting Blood Pressure, exam 1]	[Tobacco and caffeine]. Any coffee, tea, or chocolate within the last 4 hours? Q4 [Siting Blood Pressure, exam 1]	Current cigarette smoker [Cohort, Exam 1]	[Participant information]. FTRX22 [Fasting/Tracking Form, exam 1]	[Blood processing]. Time specimen tubes 2,4-7 were spun [Venipuncture Form, VENA, Cohort Visit 1]	How old were you when you stopped smoking? Q47 [Home Interview, exam 1]	Current occupation. Q55 [Home Interview, exam 1]	[Alcohol]. How many drinks of hard liquor do you usually have per week? (1 1/2 oz. shots; round down). Q98 [Dietary Intake Form, exam 1]	[Administrative information]. Method of data collection. Q51 [Medical History Form, exam 1]			Incident atrial fibrillation event as determined by hospital discharge codes on the cohort eligibility form (CEL)	[Cough]. Do you usually bring up phlegm from your chest? Q7 [Respiratory Symptoms and Physical Activity Form, exam 1]	[Asthma]. Age asthma stopped. Q39 [Respiratory Symptoms and Physical Activity Form, exam 1]	Did your mother ever have cancer? Q25 [AFU Medical History Form, AMH]			Sport index [Cohort, Exam 3]	Did your father ever have cancer? Q27 [AFU Medical History Form, AMH]							Creatinine (value). Q6a [Lipid Lab, exam 4]	Triglycerides in SI units [Cohort, Exam 3]	LIPX05 [Lipid Lab, exam 1]	Apolipoprotein B in SI units [Cohort, Exam 1]	[Reception]. Reason why did not bring all meds. Q2 [Medication Survey Form, exam 1]	any idea	Fatty acid 18:2 [g] [Nutrients, ANUT, exam 1]	[Vegetables]. In the past year, how often on average did you consume... Carrots; 1 whole or 1/2 c. cooked. Q18 [Dietary Intake Form, exam 1]	Caffeine [mg] [Nutrients, ANUT, exam 1]	QC02QL5: reader-rated qual. of interf 5 [Ultrasound Raw Data, exam 1]	QC01QL4: reader-rated qual. of interf 4 [Ultrasound Raw Data, exam 1]	RINTQL4: reader-rated qual. of interf 4 [Ultrasound Raw Data, exam 1]	ROPTQL4: reader-rated qual. of interf 4 [Ultrasound Raw Data, exam 1]	LINTQL4: reader-rated qual. of interf 4 [Ultrasound Raw Data, exam 1]	POPQL4: reader-rated qual. of interf 4 [Ultrasound Raw Data, exam 1]	LANTQL5: reader-rated qual. of interf 5 [Ultrasound Raw Data, exam 1]	RPOSQL5: reader-rated qual. of interf 5 [Ultrasound Raw Data, exam 1]	LOPTQL2: reader-rated qual. of interf 2 [Ultrasound Raw Data, exam 1]	RBIFQL3: reader-rated qual. of interf 3 [Ultrasound Raw Data, exam 1]	Shadowing in either common carotid [Cohort, Exam 1]	Visit 2, usual ethanol intake in g/week [Cohort, Exam 2]	1st Brachial systolic blood pressure reading [Ankle Brachial BP (Blood Pressure - ultrasound work station), exam 1]
	Def/Prob/Poss Inc. Stroke by 2007	[Second blood pressure measurement]. 2nd systolic. Q15 [Siting Blood Pressure, exam 1]	Fasting time of 8 hours or more [Cohort, Exam 1]	Age stopped smoking cigarettes Q31 [Home Interview, exam 1]	Sex (uncorrected from FTRA22) [Cohort, Exam 1]	[Fasting information]. Time of day [Fasting/Tracking Form, exam 1]	How many (cigars/cigarillos) do you smoke per week now? Q48 [Home Interview, exam 1]	[Occupation]. I would like you to Look at this card while I read it to you. Please tell me the letter of the response which best describes your CURRENT occupation. [Hand card to respondent and read each response category]. Q69 [Health/Medical History, exam 2]	[Alcohol]. How many bottles of cans of beer do you usually have per week? (12 oz. bottles or cans; round down). Q97 [Dietary Intake Form, exam 1]					[Cough]. Do you usually bring up phlegm at all on getting up, or first thing in the morning? Q9 [Respiratory Symptoms and Physical Activity Form, exam 1]	[Wheezing]. Age at first attack. Q18 [Respiratory Symptoms and Physical Activity Form, exam 1]	Is your natural mother living? Q12 [Home Interview, exam 1]			[Sports]. Do you exercise or play sports? Q8 [Physical Activity Form, exam 3]	Natural father living? Q20 [Home Interview, exam 1]							Are you on kidney dialysis? Q5 [Oral Glucose Tolerance Screening Version B, exam 4]	Triglyceride (value in mg/dL). Q2a [Lipid Lab, exam 3]	LIPX04 [Lipid Lab, exam 1]	Recalibrated LDL cholesterol [Cohort, Exam 1]	[Medication records]. Total		Fatty acid 22:6 [g] [Nutrients, ANUT, exam 1]		Caffeine [mg] [Nutrients, exam 3]	QC02QL3: reader-rated qual. of interf 3 [Ultrasound Raw Data, exam 1]	QC01QL2: reader-rated qual. of interf 2 [Ultrasound Raw Data, exam 1]	RINTQL2: reader-rated qual. of interf 2 [Ultrasound Raw Data, exam 1]	ROPTQL3: reader-rated qual. of interf 3 [Ultrasound Raw Data, exam 1]	LINTQL2: reader-rated qual. of interf 2 [Ultrasound Raw Data, exam 1]	POPQL2: reader-rated qual. of interf 2 [Ultrasound Raw Data, exam 1]	LPOSQL2: reader-rated qual. of interf 2 [Ultrasound Raw Data, exam 1]	RPOSQL4: reader-rated qual. of interf 4 [Ultrasound Raw Data, exam 1]	LOPTQL3: reader-rated qual. of interf 3 [Ultrasound Raw Data, exam 1]	RBIFQL2: reader-rated qual. of interf 2 [Ultrasound Raw Data, exam 1]	LOPTSHAD: shadow present Y-N [Ultrasound Raw Data, exam 1]	Alcohol intake [g per day] [Nutrients, ANUT, exam 1]
	Follow-up HEM strokes (days)	[Third blood pressure measurement]. 3rd systolic. Q18 [Siting Blood Pressure, exam 1]		Number of cigarettes smoked per day. Q32 [Home Interview, exam 1]	[Preliminary measurement]. Cuff Size: Q7 [Siting Blood Pressure, exam 1]		How old were you when you started smoking (cigars/cigarillos) regularly? Q45 [Home Interview, exam 1]	What (is/was) your (current/most recent) occupation? If more than one job, RECORD OCCUPATION FOR JOB FOR MOST HOURS PER WEEK. Code of most recent occupation. Q57 [Home Interview, exam 1]	[Alcohol]. What was the usual number of drinks you had per week before you stopped drinking alcoholic beverages? Q95 [Dietary Intake Form, exam 1]					[Cough]. Do you usually bring up phlegm at all during the rest of the day or at night? Q10 [Respiratory Symptoms and Physical Activity Form, exam 1]	Has a doctor ever said that you had any of the following: asthma? Q10h [Home Interview, exam 1]	Was this participant's natural mother living at visit 1? Q2 [Family History Form, exam 2]			[Leisure time]. In comparison with others of your own age do you think your physical activity during leisure time is. Q26 [Physical Activity Form, exam 3]	Was this participant's natural father living at visit 1? Q4 [Family History Form, exam 2]							Are you on kidney dialysis? Q12 [Dental Screening Form, exam 4]	Visit 4, triglycerides in SI units [Cohort, Exam 4]	HDL3 cholesterol (recalibrated lipid) [Cohort, Exam 1]	Total cholesterol in SI units [Cohort, Exam 1]	Used aspirin-containing analgesics (at visit 1) in last 2 weeks (0=no, 1=yes), based on 2004 Med code [Cohort, Exam 1]		Fatty acid 16:0 [g] [Nutrients, ANUT, exam 1]		[Miscellaneous]. In the past year, how often on average did you consume... Coffee, not decaffeinated; 1 c. Q61 [Dietary Intake Form, exam 2]	QC02CALF: calibration factor X.Xxxx [Ultrasound Raw Data, exam 1]	QC01CALF: calibration factor X.Xxxx [Ultrasound Raw Data, exam 1]	RINTCALF: calibration factor X.Xxxx [Ultrasound Raw Data, exam 1]	ROPTQL2: reader-rated qual. of interf 2 [Ultrasound Raw Data, exam 1]	LBFWCALF: calibration factor X.Xxxx [Ultrasound Raw Data, exam 1]	POPCALF: calibration factor X.Xxxx [Ultrasound Raw Data, exam 1]	LANTQL4: reader-rated qual. of interf 4 [Ultrasound Raw Data, exam 1]	RANTQL4: reader-rated qual. of interf 4 [Ultrasound Raw Data, exam 1]	LOPTCALF: calibration factor X.Xxxx [Ultrasound Raw Data, exam 1]	RBIFCALF: calibration factor X.Xxxx [Ultrasound Raw Data, exam 1]	LOPTPLAQ: plaque present Y-N [Ultrasound Raw Data, exam 1]	Usual alcohol intake in grams/week [Cohort, Exam 3]
	Event year for INHEM07	Has a doctor ever said that you had any of the following: high blood pressure or hypertension? Q10a [Home Interview, exam 1]		[Tobacco and caffeine]. Smoked or used chewing tobacco or snuff within the last 4 hours? Q2 [Siting Blood Pressure, exam 1]	FEF(75) predicted [Pulmonary Predicted Function, exam 1]		On the average, over the entire time you smoked (cigars/cigarillos), how many (cigars/cigarillos) did you smoke per week? Q49 [Home Interview, exam 1]	Physical activity at work, definition 2 [Cohort, Exam 1]	[Alcohol]. Approximately how many years ago did you stop drinking. Q92 [Dietary Intake Form, exam 1]					[Cough]. Number years had this cough. Q6 [Respiratory Symptoms and Physical Activity Form, exam 1]	[Medical care]. Has a doctor ever said you had any of the following: (read each disease name and code N if No or Never Tested). Q5. Asthma. Q5F [Health/Medical History, exam 2]	How old was she when she was first told she had: cancer. Q16a [Home Interview, exam 1]			Sport during leisure time [Cohort, Exam 1]	How old was he when he was first told he had: cancer. Q24a [Home Interview, exam 1]							Urea Nitrogen (mg/dL). Q8 [Clinical Chemistry Lab, exam 1]	Triglycerides &lt;= 400 Mg/dL [Cohort, Exam 4]	HDL2 cholesterol (recalibrated lipid) [Cohort, Exam 1]	Cholesterol (value). Q1a [Lipid Lab, exam 2]	[Reception]. Bring all meds used in past 2 weeks? Q1 [Medication Survey Form, exam 1]		Total fat [g] [Nutrients, ANUT, exam 1]		Caffeine [mg] [Nutrients, exam 2]		Year of reading date [Ultrasound Raw Data, exam 1]	Plaque (with or without shadowing) in any carotid site [Cohort, Exam 1]				LPOSQL3: reader-rated qual. of interf 3 [Ultrasound Raw Data, exam 1]	RANTQL3: reader-rated qual. of interf 3 [Ultrasound Raw Data, exam 1]			ROPTPLAQ: plaque present Y-N [Ultrasound Raw Data, exam 1]	Alcohol intake [g] per day [Nutrients, exam 3]
	Follow Up Days to Death by 2007	Blood pressure lowering medications in the past 2 weeks [Cohort, Exam 1]		How old were you when you first started regular cigarette smoking? Q29 [Home Interview, exam 1]	Have you ever smoked a pipe regularly? Q37 [Home Interview, exam 1]		Cigar/cigarillo years of smoking [Cohort, Exam 1]	Work index, definition 2 [Cohort, Exam 3]	[Alcohol]. For how many years did you drink alcoholic beverages? Q93 [Dietary Intake Form, exam 1]					[Cough]. Usually have a cough? Q1 [Respiratory Symptoms and Physical Activity Form, exam 1]	[Medical care]. Has a doctor ever said you had any of the following? Asthma. Q6e [Personal History form, exam 4]	How old was she when she was first she had: cancer Q19a [Home Interview, exam 1]			[Leisure time]. During leisure time would you say you play sports or exercise. Q64 [Respiratory Symptoms and Physical Activity Form, exam 1]	Did your mother ever have cancer? At approximately what age was the (first) cancer diagnosis? Q27c [AFU Medical History Form, AMH]								Specimen appearance. Q4 [Clinical Chemistry Lab, exam 1]	HDL(3) cholesterol (value). Q4a [Lipid Lab, exam 2]	Visit 2, apolipoprotein B in mg/L [Cohort, Exam 2]			Fatty acid 10:0 [g] [Nutrients, ANUT, exam 1]		How many cups of regular coffee do you drink on a regular day?		Number Of QC repeat scans [Ultrasound Derived Data, exam 1]					LANTQL3: reader-rated qual. of interf 3 [Ultrasound Raw Data, exam 1]	RPOSQL3: reader-rated qual. of interf 3 [Ultrasound Raw Data, exam 1]			ROPTSHAD: shadow present Y-N [Ultrasound Raw Data, exam 1]	Usual alcohol intake in Grams/Week [Cohort, Exam 4]
	Year of death by 2007	Hypertension, definition 5; replaces HYPER02 [Cohort, Exam 1]		Cigarette smoking status [Cohort, Exam 1]	FEV(3) predicted (liters) [Pulmonary Predicted Function, exam 1]		[Smoking]. How many (cigars/cigarillos) do you smoke per week now? [Code 00 if less than one per week]. Q54 [Health/Medical History, exam 2]	Total words listed. Q4 [Cognitive Function Form, exam 4]	Former drinker [Cohort, Exam 1]						[Asthma]. Still have asthma? Q38 [Respiratory Symptoms and Physical Activity Form, exam 1]	Did your mother ever have cancer? At approximately what age was the (first) cancer diagnosed? Q25c [AFU Medical History Form, AMH]			[Leisure time]. During leisure time would you say you play sports or exercise. Q25 [Physical Activity Form, exam 3]	Did your natural father ever have any of the following diseases? Cancer? Q23a [Home Interview, exam 1]								Triglycerides mg/dl	HDL cholesterol (value). Q3a [Lipid Lab, exam 2]	ApoB (value). Q2a [Apolipoprotein A-I in Plasma by Radioimmunoassay, Cohort exam 2]			Fatty acid 20:5 [g] [Nutrients, ANUT, exam 1]									LANTQL2: reader-rated qual. of interf 2 [Ultrasound Raw Data, exam 1]	RPOSQL2: reader-rated qual. of interf 2 [Ultrasound Raw Data, exam 1]			Plaque/shadowing (both, 1 w/o other, neither) in the right common carotid [Cohort, Exam 1]	[Alcohol]. How many glasses, bottles, or cans of beer do you usually have per week? (12 oz. glasses, bottles, or cans, round down). Q45a [Personal History Form, exam 3]
	Follow-up CHM strokes (days)	Hypertension, definition 6; replaces HYPERT03 [Cohort, Exam 1]		On the average of the entire time you smoked, how many cigarettes did you usually smoke per day? Q35 [Home Interview, exam 1]	FEF(25) predicted [Pulmonary Predicted Function, exam 1]		Do you now smoke (cigars/cigarillos)? Q46 [Home Interview, exam 1]	Total words listed (CFNA, Q4.). Q4 [Cognitive Function Form, CNF, exam 2]	Current drinker [Cohort, Exam 1]						[Wheezing]. Short Of Breath Wheezing Attack? Q17 [Respiratory Symptoms and Physical Activity Form, exam 1]	Did your natural mother ever have or does she now have any of the following diseases? Cancer? Q18a [Home Interview, exam 1]												Triglyceride (value). Q2a [Lipid Lab, exam 4]	Visit 2, HDL cholesterol in mmol/L [Cohort, Exam 2]	Visit 2, total cholesterol in Mmol/L [Cohort, Exam 2]			Tryptophan [mg] [Nutrients, ANUT, exam 1]									LANTCALF: calibration factor X.Xxxx [Ultrasound Raw Data, exam 1]	RANTCALF: calibration factor X.Xxxx [Ultrasound Raw Data, exam 1]			Plaque/shadowing (both, 1 w/o other, neither) in the left common carotid [Cohort, Exam 1]	[Alcohol]. During the past 24 hours, how many drinks have you had? Q47 [Personal History Form, exam 3]
	Event year for INCHM07	Hypertension, definition 4; replaces HYPERT01 [Cohort, Exam 1]		ASK NON-SMOKERS ONLY: during the past year, about how many hours per week, on the average, were you in close contact with people when they were smoking? Q52 [Home Interview, exam 1]	FEV(1) predicted (liters) [Pulmonary Predicted Function, exam 1]		[Smoking]. Do you now smoke cigars or cigarillos? Q53 [Health/Medical History, exam 2]	Most recent occupation [Cohort, Exam 1]	Ever drinker [Cohort, Exam 1]							Did your natural mother ever have any of the following diseases? Cancer? Q15a [Home Interview, exam 1]												Triglycerides &lt;= 400 mg/dL [Cohort, Exam 1]	Re-calibrated HDL(3) cholesterol in SI units [Cohort, Exam 1]	Visit 2, re-calculated LDL-C in mg/dL [Cohort, Exam 2]			Animal protein [g] [Nutrients, ANUT, exam 1]									LPOSCALF: calibration factor X.Xxxx [Ultrasound Raw Data, exam 1]	RPOSCALF: calibration factor X.Xxxx [Ultrasound Raw Data, exam 1]				[Alcohol]. Thinking about the entire time you consumed alcoholic beverages, how many glasses, cans, or bottles of beer did you usually have per week? (12 oz. glasses, bottles or cans; round down). Q50 [Personal History Form, exam 3]
	Follow-up ISC strokes (days)	Average Ankle systolic blood pressure [Ankle Brachial BP (Blood Pressure - ultrasound work station), exam 1]		Cigarette years of smoking [Cohort, Exam 1]	FEV(.5) predicted (liters) [Pulmonary Predicted Function, exam 1]			[Occupation]. Was this participant retired at visit 1? [See PIN sheet]. Q70 [Health/Medical History, exam 2]	[Alcohol]. I am going to ask you about wine, beer, and drinks made with hard liquor because these are the three major types of alcoholic beverages. Do you presently drink alcoholic beverages? Q90 [Dietary Intake Form, exam 1]																			Triglycerides under 400 [Cohort, Exam 2]	Recalibrated HDL cholesterol in SI units [Cohort, Exam 1]	Visit 2, LDL cholesterol in mmol/L [Cohort, Exam 2]			Fatty acid 6:0 [g] [Nutrients, ANUT, exam 1]														[Alcohol]. Thinking about the entire time you consumed alcoholic beverages, how many drinks of hard liquor did you usually have per week (1.5 oz. shot, round down). Q51 [Personal History Form, exam 3]
	Event Year for INISC07	2nd Ankle systolic blood pressure reading [Ankle Brachial BP (Blood Pressure - ultrasound work station), exam 1]		Ever smoker flag [Cohort, Exam 2]	PEFR predicted [Pulmonary Predicted Function, exam 1]			[Occupation]. Since your last ARIC visit, have (did) you change(d) the company for which you work(ed)? Q57 [Personal History Form, exam 3]	Drinker status [Cohort, Exam 1]																			Specimen appearance. Q4 [Clinical Chemistry Lab, exam 2]	Apolipoprotein AI in SI units [Cohort, Exam 1]	Cholesterol (value in mg/dL). Q1a [Lipid Lab, exam 3]			Energy [Kcal] [Nutrients, ANUT, exam 1]														[Alcohol]. How many drinks of hard liquor do you usually have per week? (1.5 oz. shots; round down). Q46a [Personal History Form, exam 3]
	Age for INHEM07	Third blood pressure measurement, systolic. Q18 [Sitting Blood Pressure, exam 2]		Current smoker flag [Cohort, Exam 2]	FEF(50) predicted [Pulmonary Predicted Function, exam 1]			Total words listed. Q4 [Cognitive Function Form, exam 3]	Current drinker flag [Cohort, Exam 2]																			Triglycerides &lt;= 400 mg/dL [Cohort, Exam 3]	Re-calibrated HDL(2) cholesterol in SI units [Cohort, Exam 1]	LDL cholesterol (value in mg/dL) Q5 [Lipid Lab, exam 3]			Fatty acid 18:0 [g] [Nutrients, ANUT, exam 1]														[Alcohol]. How many glasses, bottles, or cans of beer do you usually have per week? Q18a [Personal History form, exam 4]
	Age for INDP07	Second blood pressure measurement, systolic. Q15 [Sitting Blood Pressure, exam 2]		Former smoker flag [Cohort, Exam 2]	FEV(3)/FVC predicted (%) [Pulmonary Predicted Function, exam 1]			Education levels, D\definition 1 [Cohort, Exam 1]	Ever drinker flag [Cohort, Exam 2]																				Visit 2, apolipoprotein Ai in mg/L [Cohort, Exam 2]	Total cholesterol in SI units [Cohort, Exam 3]			Fatty acid 12:0 [g] [Nutrients, ANUT, exam 1]														[Alcohol]. How many drinks of hard liquor do you usually have per week? Q19a [Personal History form, exam 4]
	Age for INDPP07	Medications which secondarily affect cholesterol: using 2004 Med. Code, visit 2 [Cohort, Exam 2]		Former cigarette smoker [Cohort, Exam 1]	FVC predicted (Liters) [Pulmonary Predicted Function, exam 1]			Educational level: number of years	Former drinker flag [Cohort, Exam 2]																				Visit 2, HDL (3) cholesterol in mmol/L [Cohort, Exam 2]	Re-calibrated LDL cholesterol in mg/dL [Cohort, Exam 3]			Aspartic acid [g] [Nutrients, ANUT, exam 1]														[Alcohol]. During the past 24 hours, how many drinks have you had? Q20 [Personal History form, exam 4]
	MI/FATCHD/SMI Procedure 2007	Hypertension Meds (self reported) [Cohort, Exam 2]		Have you smoked or used chewing tobacco or snuff within the last 4 hours? Q2 [Sitting Blood Pressure, exam 2]	FEF(25-75) predicted [Pulmonary Predicted Function, exam 1]				[Alcohol]. During the past 24 hours, how many drinks have you had? [If 0 go to item 69]. Q67 [Health/Medical History, exam 2]																				Visit 2, HDL (2) cholesterol in mmol/L [Cohort, Exam 2]	Re-calibrated LDL cholesterol in mmol/L [Cohort, Exam 3]			Glutamic acid [g] [Nutrients, ANUT, exam 1]														[Alcohol]. How many days in a week do you usually drink beer? Q45b [Personal History Form, exam 3]
	Event year for ISP07	Hypertension lowering medication within past 2 weeks (visit 2) [Cohort, Exam 2]		[Smoking]. How many cigarettes do you smoke per day now? [Code 00 if less than one per day]. Q48 [Health/Medical History, exam 2]	FEV(1)/FVC predicted (%) [Pulmonary Predicted Function, exam 1]				[Alcohol]. How many drinks of hard liquor do you usually have per week? [1 1/2 oz. shots; round down]. Q66 [Health/Medical History, exam 2]																				Visit 2, HDL (2) cholesterol in mg/dL [Cohort, Exam 2]	LDL cholesterol. Q8 [Lipid Lab, exam 4]			Monounsaturated fatty acid [%kcal] [Nutrients, ANUT, exam 1]														[Alcohol]. How many days in a week do you usually drink hard liquor? Q46b [Personal History Form, exam 3]
	Event year for IS07	First blood pressure measurement, systolic. Q12 [Sitting Blood Pressure, exam 2]		[Smoking]. ASK NON-SMOKERS ONLY: during the past year, about how many hours per week on the average, were you in close contact with people when they were smoking? For example, in your home, in a car, at work, or other close quarter. Q57 [Health/Medical History, exam 2]	How much pipe tobacco are you smoking now? (oz. per week). Q41 [Home Interview, exam 1]				[Alcohol]. How many bottles or cans of beer do you usually have per week? [12 oz. bottles or cans; round down]. Q65 [Health/Medical History, exam 2]																				Re-calibrated HDL cholesterol in mmol/L [Cohort, Exam 3]	Cholesterol (value). Q1a [Lipid Lab, exam 4]			Fatty acid 8:0 [g] [Nutrients, ANUT, exam 1]														[Alcohol]. How many days in a week do you usually drink beer? Q18b [Personal History form, exam 4]
	Event year for IP07	[Preliminary measurement]. Peak inflation level. Q11 [Sitting Blood Pressure, exam 2]		[Smoking]. Have you ever smoked cigarettes? [Code No if less than 400 cigarettes in a lifetime]. Q44 [Health/Medical History, exam 2]	Pipe smoking status [Cohort, Exam 1]				[Alcohol]. How many glasses of wine do you usually have per week? [4 oz. glasses; round down]. Q64 [Health/Medical History, exam 2]																				HDL cholesterol (value in mg/dL) Q3a [Lipid Lab, exam 3]	Visit 4, total cholesterol in SI units [Cohort, Exam 4]			Fatty acid 14:0 [g] [Nutrients, ANUT, exam 1]														Usual alcohol intake
	Follow up time for IP07 (days)	[Preliminary measurement]. Peak inflation level. Q11 [Siting Blood Pressure, exam 1]		Visit 2, cigarette smoking status [Cohort, Exam 2]	[Preliminary measurement]. Right arm circumference (cm) Q6 [Siting Blood Pressure, exam 1]				[Alcohol]. Approximately how many years ago did you stop drinking? Q60 [Health/Medical History, exam 2]																				HDL cholesterol (value). Q3a [Lipid Lab, exam 4]	Re-calibrated LDL cholesterol in mmol/L [Cohort, Exam 4]			Animal fat without visible fat [g] [Nutrients, ANUT, exam 1]														[Alcohol]. How many days in a week do you usually drink hard liquor? Q19b [Personal History form, exam 4]
	Follow up time for ISP07 (days)	[Medical care]. Has a doctor ever said you had any of the following: (read each disease name and code N if No or never tested.) Q5 High blood pressure or hypertension (high blood). Q5A [Health/Medical History, exam 2]		Ever smoker [Cohort, Exam 3]	Mean Triceps In mm [Cohort, Exam 1]				[Alcohol]. Do you presently drink alcoholic beverages? Q58 [Health/Medical History, exam 2]																				Re-calibrated HDL cholesterol in mmol/L [Cohort, Exam 4]	Re-calibrated LDL cholesterol in mg/dL [Cohort, Exam 4]			Monounsaturated fatty acid [g] [Nutrients, ANUT, exam 1]														Alcohol intake [g] per day [Nutrients, exam 2]
	Event year for INC07	Visit 2, hypertension, definition 5 [Cohort, Exam 2]		Current smoker [Cohort, Exam 3]	Sitting height In cm [Cohort, Exam 1]				Visit 2, drinking status [Cohort, Exam 2]																				HDL cholesterol (mg/dl)	Cholesterol mg/dl			Fatty acid 16:1 [g] [Nutrients, ANUT, exam 1]														How many mixed drinks or shots of liquor 4 hours before going to sleep last night?
	Event year for INDPP07	Visit 2, hypertension, definition 4 [Cohort, Exam 2]		Former smoker [Cohort, Exam 3]	How old were you when you stopped? Q40 [Home Interview, exam 1]				[Alcohol]. For how many years did you drink alcoholic beverages? Q61 [Health/Medical History, exam 2]																					Recalibrated LDL cholesterol in SI units [Cohort, Exam 1]			Keys score [Nutrients, ANUT, exam 1]
	Event year for SMI07	Visit 2, hypertension, definition 6 [Cohort, Exam 2]		[Tobacco and caffeine use]. Any tobacco in last 4 hours? Q2 [Sitting Blood Pressure, exam 3]	How old were you when you started to smoke a pipe regularly? Q38 [Home Interview, exam 1]				[Alcohol]. What was the usual number of drinks you had per week before you stopped drinking alcoholic beverages? One drink means 1 beer or 1 glass of wine or 1 shot of liquor or one mixed drink. [Record 00 if less than one drink per week]. Q63 [Health/Medical History, exam 2]																								Fatty acid 22:5 [g] [Nutrients, ANUT, exam 1]
	Event year for PROC07	[Interview]. Were any of the medications you took during the past two weeks for: High blood pressure? Q8a [Medication Survey Form, exam 1]		[Smoking]. Have you ever smoked cigarettes? Q25 [Personal History Form, exam 3]	On the average over the entire time you smoked a pipe, how much pipe tobacco did you smoke per week? (oz. per week). Q42 [Home Interview, exam 1]				Current drinker [Cohort, Exam 3]																								Fatty acid 22:1 [g] [Nutrients, ANUT, exam 1]
	Follow up time for IS07 (days)	Medications which secondarily affect cholesterol: using 2004 Med. code, visit 3 [Cohort, Exam 3]		Version 3, cigarette smoking status [Cohort, Exam 3]	Mean subscapular in mm [Cohort, Exam 1]				Ever drinker [Cohort, Exam 3]																								Carbohydrate [g] [Nutrients, ANUT, exam 1]
	MI/FATCHD/SMI 2007	Hypertension lowering medication within past 2 weeks (visit 3) [Cohort, Exam 3]		Ever smoked cigarettes [Cohort, Exam 4]	Body Mass Index in Kg/(m2) [Cohort, Exam 1]				Former drinker [Cohort, Exam 3]																								Fatty acid 18:3 [g] [Nutrients, ANUT, exam 1]
	Follow-up DP strokes (days)	Visit 3, hypertension medications, definition 1 [Cohort, Exam 3]		Former cigarette smoker [Cohort, Exam 4]	Diabetes - lower cut point 140 [mg/dL] [Cohort, Exam 1]				Drinker status [Cohort, Exam 3]																								Vitamin B12 [Micrograms] [Nutrients, ANUT, exam 1]
	Survival status for In_by07p [Alive on 12/31/2007, Dead by 12/31/2007, FATCHD, F_MI, F_PROC, Loss to FU, N_MI, N_PROC, OTHER]	Average mean arterial blood pressure [Cohort, Exam 3]		Current cigarette smoker [Cohort, Exam 4]	Diabetes - lower cut point 126 [mg/dL] [Cohort, Exam 1]				[Alcohol]. Do you presently drink alcoholic beverages? Q40 [Personal History Form, exam 3]																								Saturated fatty acid [%kcal] [Nutrients, ANUT, exam 1]
	Survival status for In_07sp [Alive on 12/31/2007, Dead by 12/31/2007, FATCHD, F_MI, F_PROC, F_PROC, Loss to FU, N_MI, N_PROC, OTHER, SMI]	2nd systolic blood pressure measurement, systolic. Q16 [Sitting Blood Pressure, exam 3]		[Tobacco and caffeine use]. Any tobacco today? Q2 [Sitting Blood Pressure, exam 4]	Has a doctor ever said that you had any of the following: diabetes (sugar in the blood)? Q10e [Home Interview, exam 1]				Current drinker [Cohort, Exam 4]																								Energy without visible fat [Kcal] [Nutrients, ANUT, exam 1]
	Survival status for Inc_by07 [Alive on 12/31/2007, Dead by 12/31/2007, FATCHD, F_MI, N_MI, OTHER, Loss to FU]	2nd diastolic blood pressure measurement, diastolic. Q17 [Sitting Blood Pressure, exam 3]		Cigarette smoking status [Cohort, Exam 4]	1 Low water level in spirometer 0 acceptable 9 No Flow-Vol Lp [Pulmonary Function Test, exam 1]				Ever drinker [Cohort, Exam 4]																								Fatty acid 20:4 [g] [Nutrients, ANUT, exam 1]
	Follow up time for PROC07 (days)	[Preliminary measurements]. Peak inflation level. Q12 [Sitting Blood Pressure, exam 3]		[Smoking]. Have you ever smoked cigarettes? Q7 [Personal History form, exam 4]	1 Computer started after expiration start [Pulmonary Function Test, exam 1]				[Alcohol]. Have you ever consumed alcoholic beverages? Q14 [Personal History form, exam 4]																								Polyunsaturated fatty acid [g] [Nutrients, ANUT, exam 1]
	Follow up time for SMI07 (days)	[Computed net average of second and third blood pressure measurements]. 2nd and 3rd systolic blood pressure average. Q22 [Sitting Blood Pressure, exam 3]		Do you now smoke cigarettes? Q30 [Home Interview, exam 1]	Sex (M, F) [Pulmonary Function Test, exam 1]				Drinker status variable [Cohort, Exam 4]																								Sucrose [g] [Nutrients, ANUT, exam 1]
	Age for INISC07	3rd systolic blood pressure measurement, systolic. Q19 [Sitting Blood Pressure, exam 3]		[Smoking]. Do you now smoke cigarettes? Q45 [Health/Medical History, exam 2]	1 Cough/inhalation present [Pulmonary Function Test, exam 1]				Former drinker [Cohort, Exam 4]																								Sodium [mg] [Nutrients, ANUT, exam 1]
	Age for IS07	3rd diastolic blood pressure measurement, diastolic. Q20 [Sitting Blood Pressure, exam 3]		[Smoking]. Do you now smoke cigarettes? Q27 [Personal History Form, exam 3]	1 Breath-hold leak &gt; 5%. Q10c [Pulmonary Function Test, exam 1]				[Alcohol]. Do you presently drink alcoholic beverages? Q15 [Personal History form, exam 4]																								Pantothenic acid [mg] [Nutrients, ANUT, exam 1]
	Def/Prob Ischemic Inc. Stroke by 2007	[Computed net average of second and third blood pressure measurements]. 2nd and 3rd diastolic blood pressure average. Q23 [Sitting Blood Pressure, exam 3]		[Smoking]. Do you now smoke cigarettes? Q8 [Personal History form, exam 4]	FVC (liters) [Pulmonary Function Test, exam 1]				[Alcohol]. Have you ever consumed alcoholic beverages? Q91 [Dietary Intake Form, exam 1]																								Fatty acid 18:4 [g] [Nutrients, ANUT, exam 1]
	Survival status for In_07s [Alive on 12/31/2007, Dead by 12/31/2007, FATCHD, F_MI, Loss to FU, N_MI, OTHER, SMI]	[Preliminary measurements]. Pulse obliteration pressure. Q10 [Sitting Blood Pressure, exam 3]		[Smoking]. When did you smoke your last cigarette? Q46 [Health/Medical History, exam 2]	FEV(3) (liters) [Pulmonary Function Test, exam 1]				[Alcohol]. Have you ever consumed alcoholic beverages? Q59 [Health/Medical History, exam 2]																								Lactose [g] [Nutrients, ANUT, exam 1]
	Hospitalized myocardial infarction by 2007	1st systolic blood pressure measurement, systolic. Q13 [Sitting Blood Pressure, exam 3]		[Smoking]. Prior to quitting, how many cigarettes did you usually smoke per day? [Code 00 if less than one per day]. Q47 [Health/Medical History, exam 2]	FEV(1) (liters) [Pulmonary Function Test, exam 1]				[Alcohol]. Have you ever consumed alcoholic beverages? Q41 [Personal History Form, exam 3]																								Fructose [g] [Nutrients, ANUT, exam 1]
	MI/FATCHD by 2007	1st diastolic blood pressure measurement, diastolic. Q14 [Sitting Blood Pressure, exam 3]		[Smoking]. When did you smoke your last cigarette? Q28 [Personal History Form, exam 3]	1 No plateau [Pulmonary Function Test, exam 1]				[Alcohol]. Drank liquor in the past 24 hrs. Q100c [Dietary Intake Form, exam 1]																								Vegetable fat [%kcal] [Nutrients, ANUT, exam 1]
	Age for IP07	Visit 3, hypertension, definition 5 [Cohort, Exam 3]		[Smoking]. When did you smoke your last cigarette? Q9 [Personal History form, exam 4]	FEV(6) (liters) [Pulmonary Function Test, exam 1]				[Alcohol]. Beer drunk past 24 hours? Q68b [Health/Medical History, exam 2]																								Polyunsaturated fatty acid [%kcal] [Nutrients, ANUT, exam 1]
	Age for ISP07	Visit 3, hypertension, definition 6 [Cohort, Exam 3]		Smoking status (never=0, current=1, former=2)	FEV(1) over FVC [Pulmonary Function Test, exam 1]				[Alcohol]. Liquor drunk past 24 hours? Q68c [Health/Medical History, exam 2]																								Fatty acid 20:1 [g] [Nutrients, ANUT, exam 1]
	Age for SMI07	Visit 3, hypertension, definition 4 [Cohort, Exam 3]		Have you ever smoked cigarettes (ever = at least 20 packs in lifetime)?	1 Submaximal effort [Pulmonary Function Test, exam 1]				[Alcohol]. Drank beer in the past 24 hrs. Q100b [Dietary Intake Form, exam 1]																								Methionine [g] [Nutrients, ANUT, exam 1]
	Follow up time for INC07 (days)	Computed net average of second and third blood pressure measurements, diastolic. Q22 [Sitting Blood Pressure, exam 2]		Lifetime cigarette smoking: pack years	FEV(.5) (Liters) [Pulmonary Function Test, exam 1]																												Total fat [%kcal] [Nutrients, ANUT, exam 1]
	Def/Prob Combined Hemm Inc. Stroke by 2007	[Interview]. Were any of the medications you took during the past two weeks for: high blood pressure. Q24A [Medication Survey Form, exam 2]		How many cigarettes 4 hours before going to sleep last night?	FEF(25-75) [Pulmonary Function Test, exam 1]																												Saturated Fatty Acid [g] [Nutrients, ANUT, exam 1]
	Age at death by 2007	[Interview]. Were any of the medications you took during the past two weeks for: high blood pressure. Q24a [Medication Survey Form, exam 3]		Do you now smoke cigarettes?	FEV(3) over FVC [Pulmonary Function Test, exam 1]																												Vitamin D [IU] [Nutrients, ANUT, exam 1]
	MI/FATCHD Procedure 2007	Hypertension lowering medication within past 2 weeks (visit 4) [Cohort, Exam 4]		Smoking change status [Hemostasis Lab, exam 3]	FEV(.5) over FVC [Pulmonary Function Test, exam 1]																												Dietary cholesterol [mg] [Nutrients, ANUT, exam 1]
	Cardiac procedures	Visit 3, hypertension medications, definition 1 [Cohort, Exam 4]		If no to [SMKNOW15]: year stopped smoking?	PEFR [Pulmonary Function Test, exam 1]																												Fatty acid 4:0 [g] [Nutrients, ANUT, exam 1]
	History of myocardial infarction [Cohort, Exam 1]	Medications which secondarily affect cholesterol: using 2004 med code -visit 4 [Cohort, Exam 4]			FEF(50) [Pulmonary Function Test, exam 1]																												Animal fat [%kcal] [Nutrients, ANUT, exam 1]
	Age for INC07	2nd systolic blood pressure measurement. Q16 [Sitting Blood Pressure, exam 4]			FEF(75) [Pulmonary Function Test, exam 1]																												Copper [mg] [Nutrients, ANUT, exam 1]
	Def/Prob incident stroke by 2007	1st and 2nd systolic blood pressure average. Q19 [Sitting Blood Pressure, exam 4]			Flow calibration [Pulmonary Function Test, exam 1]																												Manganese [mg] [Nutrients, ANUT, exam 1]
	Dead by 2007 from DTH/NDI/AFU	1st systolic blood pressure measurement. Q13 [Sitting Blood Pressure, exam 4]			FEF(25) [Pulmonary Function Test, exam 1]																												Retinol [IU] [Nutrients, ANUT, exam 1]
	MD diagnosed myocardial infarction [Cohort, Exam 1]	2nd diastolic blood pressure measurement. Q17 [Sitting Blood Pressure, exam 4]			[Preliminary measurement]. Maximum zero. Q10 [Siting Blood Pressure, exam 1]																												Alpha-tocopherol [mg] [Nutrients, ANUT, exam 1]
	Has a doctor ever said that you had any of the following: heart attack? Q10c [Home Interview, exam 1]	1st and 2nd diastolic blood pressure average. Q20 [Sitting Blood Pressure, exam 4]			[Breast Examination]. Breast examination? Q20 [Physical Examination Form, exam 1]																												Omega fatty acid W20:5 and W22:6 [g] [Nutrients, ANUT, exam 1]
	[Possible infraction]. Number of Q28 [have you ever had a heart attack for which you were hospitalized on week or more?] type heart attacks. Q29 [Medical History Form, exam 1]	2nd blood pressure measurement, zero reading. Q18 [Sitting Blood Pressure, exam 4]			Derived glucose value in mg/dL [Cohort, Exam 1]																												Protein [%kcal] [Nutrients, ANUT, exam 1]
	[Possible infraction]. Age at first heart attack. Q30 [Medical History Form, exam 1]	1st diastolic blood pressure measurement. Q14 [Sitting Blood Pressure, exam 4]			Flow offset [Pulmonary Function Test, exam 1]																												[Dairy foods]. In the past year, how often on average did you consume... Other cheeses, plain or as part of a dish; 1 slice or serving. Q6 [Dietary Intake Form, exam 1]
	Follow-up time (in days) for an incident atrial fibrillation event as determined by hospital discharge codes on the cohort eligibility form (CEL)	1st blood pressure measurement, zero reading. Q15 [Sitting Blood Pressure, exam 4]			Hematocrit % (MAV). Q1 [Hematology Form, exam 1]																												[Meats]. In the past year, how often on average did you consume... Beef, pork, or lamb as a sandwich or mixed dish, stew, casserole, lasagne, or in spaghetti sauce, etc. Q32 [Dietary Intake Form, exam 1]
	Follow-up time for AFHOSP1by05	[Preliminary measurement]. Peak inflation level. Q12 [Sitting Blood Pressure, exam 4]			Hemoglobin g/dL (MAV). Q2 [Hematology Form, exam 1]																												[Sweets, baked goods, cereals]. In the past year, how often on average did you consume... Chocolate bars or pieces, such as Hershey's, Plain, M&amp;M's, Snickers, Reeses; 1 oz. Q39 [Dietary Intake Form, exam 1]
	Follow-up time (in days) for an incident atrial fibrillation event at visit 2, 3, or 4	[Preliminary measurement]. Pulse obliteration pressure. Q10 [Sitting Blood Pressure, exam 4]			1 Spirometer not calibrated correctly [Pulmonary Function Test, exam 1]																												[Meats]. In the past year, how often on average did you consume... Beef, pork, or lamb as a main dish, steak, roast, ham, etc. Q33 [Dietary Intake Form, exam 1]
	Follow-up time for an incident atrial flutter event as determined by hospital discharge codes on the cohort eligibility form (CEL) or at cohort visits 2, 3, or 4	Hypertension, definition 5 [Cohort, Exam 4]			Stroke or transient ischemic attack [TIA] vertebrobasilar system [VBI] [Stroke, exam 1]																												Carbohydrate [%kcal] [Nutrients, ANUT, exam 1]
	Symptomatic coronary heart disease [Cohort, Exam 1]	Hypertension, definition 6 [Cohort, Exam 4]			Stroke or transient ischemic attack [TIA] right carotid [Stroke, exam 1]																												[Other dietary items]. How often do you eat liver; 3-4 oz. serving. Q66 [Dietary Intake Form, exam 1]
	Atrial fibrillation [Atrial Fibrillation, exam 1]	Hypertension, definition 4 [Cohort, Exam 4]			Stroke or transient ischemic attack [TIA] left carotid [Stroke, exam 1]																												[Sweets, baked goods, cereals]. In the past year, how often on average did you consume... Dark or whole grain bread; 1 slice. Q51 [Dietary Intake Form, exam 1]
	Prevalent atrial fibrillation at visit 1	[Medical care]. Have you ever been treated by a doctor for high blood pressure? Q4 [Personal History form, exam 4]			Stroke [Stroke, exam 1]																												[Meats]. In the past year, how often on average did you consume... Other fish, such as cod, perch, catfish, etc.; 3-5 oz. Q36 [Dietary Intake Form, exam 1]
	[Possible infraction]. Have you ever had a heart attack for which you were hospitalized one week or more? Q28 [Medical History Form, exam 1]	[Interview]. Were any of the medications you took during the past two weeks for: high blood pressure. Q24a [Medication Survey Form, exam 4]			Stroke-vertebrobasilar system [VBI] [Stroke, exam 1]																												[Meats]. In the past year, how often on average did you consume... Dark meat fish, such as salmon, mackerel, swordfish, sardines, bluefish; 3-5 oz. Q35 [Dietary Intake Form, exam 1]
	Prevalent coronary heart disease [Cohort, Exam 1]	SDAC8 [Carotid Distensibility, Cohort Visit 1]			Stroke or transient ischemic attack [TIA] [Stroke, exam 1]																												[Dairy foods]. In the past year, how often on average did you consume... Skim or low fat milk; 8 oz. glass. Q1 [Dietary Intake Form, exam 1]
	History of stroke [TIA/Stroke, exam 1]	SDAC6 [Carotid Distensibility, Cohort Visit 1]			Transient ischemic attack [TIA] [Stroke, exam 1]																												[Meats]. In the past year, how often on average did you consume... Eggs; 1. Q38 [Dietary Intake Form, exam 1]
	[Medical history]. Have you ever been told by a physician that you had a stroke, slight stroke, transient ischemic attack or transient ischemic attack [TIA]? Q1 [TIA/Stroke, exam 1]	SDAC7 [Carotid Distensibility, Cohort Visit 1]			Stroke-left carotid [Stroke, exam 1]																												[Meats]. In the past year, how often on average did you consume... Canned tuna fish; 3-4 oz. Q34 [Dietary Intake Form, exam 1]
	Visit 2, history of myocardial infarction [Cohort, Exam 2]	SDAC10 [Carotid Distensibility, Cohort Visit 1]			Stroke-right carotid [Stroke, exam 1]																												[Miscellaneous]. In the past year, how often on average did you consume... Potato or corn chips; small bag or 1 oz. Q53 [Dietary Intake Form, exam 1]
	Previous myocardial infarction from machine coded [Cohort, Exam 2]	SDAC9 [Carotid Distensibility, Cohort Visit 1]			Transient ischemic attack [TIA]-left carotid [Stroke, exam 1]																												[Beverages]. In the past year, how often on average did you consume... Regular soft drinks, such as Coke, Pepsi, 7-Up, ginger ale; 1 glass. Q64 [Dietary Intake Form, exam 1]
	Visit 2, MD diagnosed myocardial infarction [Cohort, Exam 2]	SDDC9 [Carotid Distensibility, Cohort Visit 1]			Estimated Form Version-Cut @ 31oct87 [TIA/Stroke, exam 1]																												[Dairy foods]. In the past year, how often on average did you consume... Ice cream; 1/2 c. Q4 [Dietary Intake Form, exam 1]
	[Medical care]. Has a doctor ever said you had any of the following: (read each disease name and code N if No or Never Tested.). Q5. Heart attack. Q5C [Health/Medical History, exam 2]	SDAC11 [Carotid Distensibility, Cohort Visit 1]			Transient ischemic attack [TIA]-right carotid [Stroke, exam 1]																												[Meats]. In the past year, how often on average did you consume... Beef, pork, or lamb as a main dish, steak, roast, ham, etc. Q33 [Dietary Intake Form (DTIC), exam 3]
	Prevalent stroke at visit 2 [Cohort, Exam 2]	SDAC12 [Carotid Distensibility, Cohort Visit 1]			Transient ischemic attack [TIA]-VBI [Stroke, exam 1]																												[Meats]. In the past year, how often on average did you consume... Beef, pork, or lamb as a sandwich or mixed dish, stew, casserole, lasagne, or in spaghetti sauce, etc. Q32 [Dietary Intake Form (DTIC), exam 3]
	Has a doctor ever said that you had any of the following: stroke? Q10d [Home Interview, exam 1]	DDDC1 [Carotid Distensibility, Cohort Visit 1]			Dizziness [Stroke, exam 1]																												[Dairy foods]. In the past year, how often on average did you consume... Skim or low fat milk; 8 oz. glass. Q1 [Dietary Intake Form (DTIC), exam 3]
	Same as QWAVE28b but uses machine code [Cohort, Exam 2]	SDAC5 [Carotid Distensibility, Cohort Visit 1]			Double vision [Stroke, exam 1]																												[Beverages]. In the past year, how often on average did you consume... Regular soft drinks, such as Coke, Pepsi, 7-Up, ginger ale; 1 glass. Q64 [Dietary Intake Form (DTIC), exam 3]
	Atrial fibrillation [Atrial Fibrillation, exam 2]	SDDC1 [Carotid Distensibility, Cohort Visit 1]			Paralysis [Stroke, exam 1]																												[Sweets, baked goods, cereals]. In the past year, how often on average did you consume... Dark or whole grain bread; 1 slice. Q51 [Dietary Intake Form (DTIC), exam 3]
	Incident atrial fibrillation event at visit 2, 3, or 4	SDDCM [Carotid Distensibility, Cohort Visit 1]			Speech problem [Stroke, exam 1]																												Fatty acid 18:1 [g] [Nutrients, exam 3]
	Same as QWAVE27a but uses machine code [Cohort, Exam 2]	DCAC10 [Carotid Distensibility, Cohort Visit 1]			Year of enrollment [Cohort, Exam 1]																												Tryptophan [mg] [Nutrients, exam 3]
	Used anticoagulants (at visit 2) last 2 weeks (0=no, 1=yes) based on 2004 Med. code [Cohort, Exam 2]	DCDCM [Carotid Distensibility, Cohort Visit 1]			Numbness [Stroke, exam 1]																												Methionine [g] [Nutrients, exam 3]
	Used anticoagulates (at visit 1) last 2 weeks (0=no, 1=yes) based on 2004 Med. code [Cohort, Exam 1]	DCDC1 [Carotid Distensibility, Cohort Visit 1]			Vision problem [Stroke, exam 1]																												Fatty acid 18:2 [g] [Nutrients, exam 3]
	Visit 2, prevalent coronary heart disease [CHD], unverified [Cohort, Exam 2]	SDAC4 [Carotid Distensibility, Cohort Visit 1]			Scanned before May 15, 1987 [Ultrasound Derived Data, exam 1]																												Total vitamin A [IU] [Nutrients, exam 3]
	Prevalent coronary heart disease [CHD] at visit 2, definition 3 [Cohort, Exam 2]	SDDC10 [Carotid Distensibility, Cohort Visit 1]			Type of study [Ultrasound Derived Data, exam 1]																												Animal protein [g] [Nutrients, exam 3]
	Visit 2, prevalent coronary heart disease [Cohort, Exam 2]	DCAC9 [Carotid Distensibility, Cohort Visit 1]			Transaction type [Ultrasound Raw Data, exam 1]																												Alpha-tocopherol [mg] [Nutrients, exam 3]
	Visit 3, history of myocardial infarction [Cohort, Exam 3]	DCAC6 [Carotid Distensibility, Cohort Visit 1]			Update level [Ultrasound Raw Data, exam 1]																												Dietary fiber [g] [Nutrients, exam 3]
	Visit 3, MD diagnosed myocardial infarction [Cohort, Exam 3]	DCAC7 [Carotid Distensibility, Cohort Visit 1]			Plaque in any carotid site - alternative definition [Cohort, Exam 1]																												Saturated fatty acid [g] [Nutrients, exam 3]
	Visit 3, prevalent coronary heart disease, unverified [Cohort, Exam 3]	DCAC8 [Carotid Distensibility, Cohort Visit 1]			Plaque/shadowing (both, 1 w/o other, neither) in any left carotid site [Cohort, Exam 1]																												Monounsaturated fatty acid [g] [Nutrients, exam 3]
	Prevalent stroke at visit 3 [Cohort, Exam 3]	SDDC11 [Carotid Distensibility, Cohort Visit 1]			Plaque/shadowing (both, 1 w/o other, neither) in any carotid site [Cohort, Exam 1]																												AOAC fiber [g] [Nutrients, exam 3]
	Same as QWAVE38b but uses machine code [Cohort, Exam 3]	DCAC5 [Carotid Distensibility, Cohort Visit 1]			LBIFQL5: reader-rated qual. of interf [Ultrasound Raw Data, exam 1]5																												Crude fiber [g] [Nutrients, exam 3]
	Diagnostic Q-wave present [Cohort, Exam 3]	DCAC4 [Carotid Distensibility, Cohort Visit 1]			Plaque/shadowing in either bifurcation [Cohort, Exam 1]																												Potassium [mg] [Nutrients, exam 3]
	Same as QWAVE37a but uses machine code [Cohort, Exam 3]	DCAC11 [Carotid Distensibility, Cohort Visit 1]			Plaque/shadowing (both, 1 w/o other, neither) in any right carotid site [Cohort, Exam 1]																												Lactose [g] [Nutrients, exam 3]
	Atrial fibrillation [Atrial Fibrillation, exam 3]	SDDC3 [Carotid Distensibility, Cohort Visit 1]			LBIFQL4: reader-rated qual. of interf [Ultrasound Raw Data, exam 1]4																												Riboflavin [mg] [Nutrients, exam 3]
	Prevalent coronary heart disease at visit 3, definition 3 [Cohort, Exam 3]	SDAC3 [Carotid Distensibility, Cohort Visit 1]			LBIFQL3: reader-rated qual. of interf [Ultrasound Raw Data, exam 1]3																												Vegetable Fat [g] [Nutrients, exam 3]
	Visit 3, prevalent coronary heart disease [Cohort, Exam 3]	DCAC12 [Carotid Distensibility, Cohort Visit 1]			Plaque/shadowing (both, 1 w/o other, neither) in either internal carotid [Cohort, Exam 1]																												Polyunsaturated fatty acid [g] [Nutrients, exam 3]
	Used anticoagulates (at visit 3) last 2 weeks (0=no, 1=yes) based on 2004 Med. code [Cohort, Exam 3]	DCAC3 [Carotid Distensibility, Cohort Visit 1]			LBIFQL2: reader-rated qual. of interf [Ultrasound Raw Data, exam 1]2																												Phosphorous [mg] [Nutrients, exam 3]
	Derived death/discharge date-days from exam 1 [Cohort Surveillance CHD Occurrence Data Dictionary]	DCACM [Carotid Distensibility, Cohort Visit 1]			Shadowing in either internal carotid artery [Cohort, Exam 1]																												Pantothenic acid [mg] [Nutrients, exam 3]
	Censoring date for follow up time of cohort participants for all types of events (including atrial fibrillation/ atrial flutter events) [Cohort Surveillance CHD Occurrence Data Dictionary]	SDACM [Carotid Distensibility, Cohort Visit 1]			Plaque In either internal carotid artery [Cohort, Exam 1]																												Niacin [mg] [Nutrients, exam 3]
	412-14 code in CEL10 [Cohort Surveillance CHD Occurrence Data Dictionary]	DCAC2 [Carotid Distensibility, Cohort Visit 1]			Year of reading date [Ultrasound Raw Data, exam 1]																												Copper [mg] [Nutrients, exam 3]
	Derived earliest date-days from exam 1 [Cohort Surveillance CHD Occurrence Data Dictionary]	DDDC9 [Carotid Distensibility, Cohort Visit 1]			LBIFCALF: calibration factor X.Xxxx [Ultrasound Raw Data, exam 1]																												Carbohydrate [g] [Nutrients, exam 3]
	Modified 06/04 Death ICD code	SDAC2 [Carotid Distensibility, Cohort Visit 1]			Plaque/shadowing (both, 1 w/o other, neither) in the right carotid bifurcation [Cohort, Exam 1]																												Zinc [mg] [Nutrients, exam 3]
	Follow up days to death/dishcharge since baseline [Cohort Surveillance CHD Occurrence Data Dictionary]	SDAC1 [Carotid Distensibility, Cohort Visit 1]			Plaque/shadowing (both, 1 w/o other, neither) in the left carotid bifurcation [Cohort, Exam 1]																												Sucrose [g] [Nutrients, exam 3]
	Days since date of discharge or death	SDDC12 [Carotid Distensibility, Cohort Visit 1]			Version [Ultrasound Raw Data, exam 1]																												Vitamin B6 [mg] [Nutrients, exam 3]
	Death/discharge year [Cohort Surveillance CHD Occurrence Data Dictionary]	SDDC8 [Carotid Distensibility, Cohort Visit 1]			1 Low water level in spirometer 0 acceptable 9 No Flow-Vol Lp [Pulmonary Function Test, exam 1]																												Vitamin B12 [Micrograms] [Nutrients, exam 3]
	Visit 4, history of myocardial infarction [Cohort, Exam 4]	DDDC8 [Carotid Distensibility, Cohort Visit 1]			1 Computer started after start of expiration [Pulmonary Function Test, exam 1]																												Energy [Kcal] [Nutrients, exam 3]
	Visit 4, MD diagnosed myocardial infarction [Cohort, Exam 4]	DCAC1 [Carotid Distensibility, Cohort Visit 1]			1 Cough, inhalation present [Pulmonary Function Test, exam 1]																												Sodium [mg] [Nutrients, exam 3]
	Prevalent stroke at visit 4 [Cohort, Exam 4]	SDDC6 [Carotid Distensibility, Cohort Visit 1]			1 Breath-hold leak &gt; 5%. Q08c [Pulmonary Function Test, exam 1]																												Folate [Micrograms] [Nutrients, exam 3]
	Visit 4, prevalent coronary heart disease - unverified [Cohort, Exam 4]	DDDC6 [Carotid Distensibility, Cohort Visit 1]			1 No plateau [Pulmonary Function Test, exam 1]																												Animal fat [g] [Nutrients, exam 3]
	Atrial fibrillation [Atrial Fibrillation, exam 4]	SDDC7 [Carotid Distensibility, Cohort Visit 1]			1 Submaximal effort [Pulmonary Function Test, exam 1]																												Dietary cholesterol [mg] [Nutrients, exam 3]
	Diagnostic Q-wave present [Cohort, Exam 4]	SDDC5 [Carotid Distensibility, Cohort Visit 1]			Overall average depth variable in pixels [Ultrasound Derived Data, exam 1]																												Thiamine [mg] [Nutrients, exam 3]
	Major Q-wave present without codes 711 or 74 [Cohort, Exam 4]	SDDC4 [Carotid Distensibility, Cohort Visit 1]			Overall average depth variable in mm [Ultrasound Derived Data, exam 1]																												Protein [g] [Nutrients, exam 3]
	Same as QWAVE48B but uses machine code [Cohort, Exam 4]	DDDC2 [Carotid Distensibility, Cohort Visit 1]			[Participant information]. State of driver's license. Q32 [Fasting/Tracking Form, exam 1]																												Fructose [g] [Nutrients, exam 3]
	Minor Q-wave with S or ST &amp; No codes 711/74 [Cohort, Exam 4]	SDDC2 [Carotid Distensibility, Cohort Visit 1]			Contact year [6, 8, 9] [AFU Medical History Form, AMH]																												Magnesium [mg] [Nutrients, exam 3]
	[Medical care]. To help pay for your medical care, do you NOW have: Medicare. Q2b [Personal History form, exam 4]	DDDC3 [Carotid Distensibility, Cohort Visit 1]			Shadowing in either carotid bifurcation [Cohort, Exam 1]																												Manganese [mg] [Nutrients, exam 3]
	[Medical care]. Has a doctor ever said you had any of the following? Heart attack. Q6a [Personal History form, exam 4]	HRT1 [Carotid Distensibility, Cohort Visit 1]			RBIFSHAD: shadow present Y-N [Ultrasound Raw Data, exam 1]																												Vitamin D [IU] [Nutrients, exam 3]
	Same as QWAVE47A but uses machine code [Cohort, Exam 4]	DDDCm [Carotid Distensibility, Cohort Visit 1]			RBIFPLAQ: plaque present Y-N [Ultrasound Raw Data, exam 1]																												Iron [mg] [Nutrients, exam 3]
	Prevalent coronary heart disease at visit 4, definition 3 [Cohort, Exam 4]	Strain [Carotid Distensibility, Cohort Visit 1]			LBIFSHAD: shadow present Y-N [Ultrasound Raw Data, exam 1]																												Retinol [IU] [Nutrients, exam 3]
	Used anticoagulates (at visit 4) last 2 weeks (0=no, 1=yes) based on 2004 med code [Cohort, Exam 4]	CY10 [Carotid Distensibility, Cohort Visit 1]			LBIFPLAQ: plaque present Y-N [Ultrasound Raw Data, exam 1]																												Omega fatty acid W20:5 and W22:6 [g] [Nutrients, exam 3]
	[Information from hospital discharge index of fact sheet]. Is a 402, 410-414, 427, 428, or 518.4 code listed? Q11a [Cohort Event Eligibility Form, CELB]	CY1 [Carotid Distensibility, Cohort Visit 1]			Depth, left common carotid: anterior angle [Ultrasound Derived Data, exam 1]																												Total carotenoid [IU] [Nutrients, exam 3]
	1 if cohort coronary heart disease eligible [Cohort Surveillance CHD Occurrence Data Dictionary]	Distensibility [Carotid Distensibility, Cohort Visit 1]			Depth, left common carotid: optimal angle [Ultrasound Derived Data, exam 1]																												Vitamin C [mg] [Nutrients, exam 3]
	[Information from hospital discharge index of fact sheet]. Is this event an in-hospital death? Q12 [Cohort Event Eligibility Form, CELB]	DCDC2 [Carotid Distensibility, Cohort Visit 1]			Depth, right common carotid: anterior angle [Ultrasound Derived Data, exam 1]																												Vitamin E [IU] [Nutrients, exam 3]
	[Identification information]. Is this a death? Q6 [Cohort Event Eligibility Form, CELB]	CY2 [Carotid Distensibility, Cohort Visit 1]			Depth, right common carotid: optimal angle [Ultrasound Derived Data, exam 1]																												Calcium [mg] [Nutrients, exam 3]
	Derived event type [Cohort Surveillance CHD Occurrence Data Dictionary]	HRT2 [Carotid Distensibility, Cohort Visit 1]			Has a doctor ever said you had diabetes, or sugar in the blood? Q1 [AFU Medical History Form, AMH]																												[Meats]. In the past year, how often on average did you consume... Canned tuna fish; 3-4 oz. Q34 [Dietary Intake Form (DTIC), exam 3]
	[Possible infraction]. Have you ever had a severe pain across the front of your chest lasting for an hour or more? Q25 [Medical History Form, exam 1]	CY12 [Carotid Distensibility, Cohort Visit 1]			Depth, right common carotid: posterior angle [Ultrasound Derived Data, exam 1]																												[Dairy foods]. In the past year, how often on average did you consume... Skim or low fat milk; 8 oz. glass. Q1 [Dietary Intake Form, exam 2]
	[Chest pain on effort]. Do you get it when you walk uphill or hurry? Q5 [Medical History Form, exam 1]	CY11 [Carotid Distensibility, Cohort Visit 1]			[Preliminary measurement]. Maximum zero. Q10 [Sitting Blood Pressure, exam 2]																												[Miscellaneous]. In the past year, how often on average did you consume... Regular soft drinks, such as Coke, Pepsi, 7-Up, ginger ale; 1 glass. Q64 [Dietary Intake Form, exam 2]
	[Second transfer]. What was the disposition of the patient on discharge? Q17 [Hospital Abstraction Form]	DCDC11 [Carotid Distensibility, Cohort Visit 1]			Race (from FTRA23) [Cohort, Exam 2]																												[Sweets, baked goods, cereals]. In the past year, how often on average did you consume... Dark or whole grain bread; 1 slice. Q51 [Dietary Intake Form, exam 2]
	[Second transfer]. Do the discharge diagnoses include any 410 or 411 codes? Q20a [Hospital Abstraction Form]	DDDC4 [Carotid Distensibility, Cohort Visit 1]			Sex (from FTRA22) [Cohort, Exam 2]																												Fatty acid 18:1 [g] [Nutrients, exam 2]
	411 code in CEL10 [Cohort Surveillance CHD Occurrence Data Dictionary]	DCDC3 [Carotid Distensibility, Cohort Visit 1]			[Preliminary measurement]. Right arm circumference (cm). Q6 [Sitting Blood Pressure, exam 2]																												Fatty acid 18:2 [g] [Nutrients, exam 2]
	410 code in CEL10 [Cohort Surveillance CHD Occurrence Data Dictionary]	CY3 [Carotid Distensibility, Cohort Visit 1]			[Body size]. Elbow breadth (to the nearest mm). Q5 [Anthropometry Form, ANTAB, exam 2]																												Methionine [g] [Nutrients, exam 2]
	[Second transfer]. Were the following special procedures or operations performed during this hospital stay? Cardiac catheterization. Q29a [Hospital Abstraction Form]	DCDC4 [Carotid Distensibility, Cohort Visit 1]			[Wait]. Weight (to the nearest lb). Q1 [Anthropometry Form, ANTAB, exam 2]																												Tryptophan [mg] [Nutrients, exam 2]
	[Second transfer]. Were the following special procedures or operations performed during this hospital stay? Coronary angiography. Q29b [Hospital Abstraction Form]	CY4 [Carotid Distensibility, Cohort Visit 1]			[Preliminary measurement]. Cuff size. Q7 [Sitting Blood Pressure, exam 2]																												Animal protein [g] [Nutrients, exam 2]
	[Second transfer]. Were the following special procedures or operations performed during this hospital stay? Coronary angioplasty. Q29c [Hospital Abstraction Form]	Diastolic blood pressure [BP] 2 [Carotid Distensibility, Cohort Visit 1]			[Body size]. Waist girth (nearest cm). Q4a [Anthropometry Form, ANTAB, exam 2]																												Total carotenoid [IU] [Nutrients, exam 2]
	[Second transfer]. Were any of the following mentioned as being present during this hospital stay? Ventricular fibrillation or cardiac arrest or asystole. Q28e [Hospital Abstraction Form]	Systolic blood pressure [BP] 2 [Carotid Distensibility, Cohort Visit 1]			FEF(75) predicted [Pulmonary Predicted Function, exam 2]																												Total vitamin A [IU] [Nutrients, exam 2]
	[Second transfer]. Was closed chest massage (CPR) and/or cardioversion attempted within 24 hours prior to arrival at this hospital or anytime during this hospitalization? Q30a [Hospital Abstraction Form]	DDDC5 [Carotid Distensibility, Cohort Visit 1]			FVC predicted (liters) [Pulmonary Predicted Function, exam 2]																												Dietary fiber [g] [Nutrients, exam 2]
	[Second transfer]. Is there a history of myocardial infarction prior to the onset of this event? Q32 [Hospital Abstraction Form]	CY5 [Carotid Distensibility, Cohort Visit 1]			FEF(25) predicted [Pulmonary Predicted Function, exam 2]																												Monounsaturated fatty acid [g] [Nutrients, exam 2]
	[Information from death index/certificate]. 1st death certificate ICD-10 code. Q19a [Death Certificate Form, DTH]	DCDC5 [Carotid Distensibility, Cohort Visit 1]			PEFR predicted (liters) [Pulmonary Predicted Function, exam 2]																												Lactose [g] [Nutrients, exam 2]
	Follow up days to hospital since baseline [Cohort Surveillance CHD Occurrence Data Dictionary]	HRT3 [Carotid Distensibility, Cohort Visit 1]			FEF(50) predicted [Pulmonary Predicted Function, exam 2]																												Saturated fatty acid [g] [Nutrients, exam 2]
	Year hospitalized [Cohort Surveillance CHD Occurrence Data Dictionary]	DCDC7 [Carotid Distensibility, Cohort Visit 1]			FEV(3)/FVC predicted (%) [Pulmonary Predicted Function, exam 2]																												Polyunsaturated fatty acid [g] [Nutrients, exam 2]
	410 in HRA eligible code question [Cohort Surveillance CHD Occurrence Data Dictionary]	DCDC8 [Carotid Distensibility, Cohort Visit 1]			FEV(1)/FVC predicted (%) [Pulmonary Predicted Function, exam 2]																												Potassium [mg] [Nutrients, exam 2]
	411 in HRA eligible code question [Cohort Surveillance CHD Occurrence Data Dictionary]	HRT4 [Carotid Distensibility, Cohort Visit 1]			FEV(.5) predicted (liters) [Pulmonary Predicted Function, exam 2]																												Magnesium [mg] [Nutrients, exam 2]
	402,427-428,or 518.4 code in HRA Eligible Code Question [Cohort Surveillance CHD Occurrence Data Dictionary]	DCDC6 [Carotid Distensibility, Cohort Visit 1]			FEF(3)/FVC predicted(%) [Pulmonary Predicted Function, exam 2]																												Carbohydrate [g] [Nutrients, exam 2]
	412-14 code in HRA eligible code question [Cohort Surveillance CHD Occurrence Data Dictionary]	DCDC12 [Carotid Distensibility, Cohort Visit 1]			FEF(25-75) predicted [Pulmonary Predicted Function, exam 2]																												Phosphorous [mg] [Nutrients, exam 2]
	Incident/fatal days 28 type for In_07sp [FATCHD, F_MI, F_PROC, N_MI, N_PROC, SMI, Missing]	DDDC7 [Carotid Distensibility, Cohort Visit 1]			FEF(1)/FVC predicted(%) [Pulmonary Predicted Function, exam 2]																												Riboflavin [mg] [Nutrients, exam 2]
	Incident Source: myocardial infarction , fatal coronary heart disease, procedure or SMI	DCDC9 [Carotid Distensibility, Cohort Visit 1]			Visit 2, mean triceps in mm [Cohort, Exam 2]																												Vitamin B12 [micrograms] [Nutrients, exam 2]
	[Information from death index/certificate]. 2nd death certificate ICD-10 code. Q19b [Death Certificate Form, DTH]	CY6 [Carotid Distensibility, Cohort Visit 1]			[Smoking]. How much pipe tobacco are you smoking now? [Record oz per week: a standard pouch of tobacco contains 1 1/2 oz. Code 00 if less than one oz. per week]. Q51 [Health/Medical History, exam 2]																												Retinol [IU] [Nutrients, exam 2]
	Incident/fatal 28 days type for In_by07p	DCDC10 [Carotid Distensibility, Cohort Visit 1]			Visit 2, mean subscapular in mm [Cohort, Exam 2]																												Niacin [mg] [Nutrients, exam 2]
	Incident Source: myocardial infarction , fatal coronary heart disease or procedure	Number of CYcles [Carotid Distensibility, Cohort Visit 1]			[Reproductive history]. Sex of participant. Q10 [Health/Medical History, exam 2]																												Pantothenic acid [mg] [Nutrients, exam 2]
	Cohort enzyme diagnosis [Cohort Surveillance CHD Occurrence Data Dictionary]	HRT5 [Carotid Distensibility, Cohort Visit 1]			Visit 2, Body Mass Index in kg/m2 [Cohort, Exam 2]																												Vitamin B6 [mg] [Nutrients, exam 2]
	Downgraded CENZDX [Cohort Surveillance CHD Occurrence Data Dictionary]	HRT9 [Carotid Distensibility, Cohort Visit 1]			Visit 2, waist-hip ratio [Cohort, Exam 2]																												Sucrose [g] [Nutrients, exam 2]
	Downgraded CARICDX with adjudicated CEC [Cohort Surveillance CHD Occurrence Data Dictionary]	DDDC12 [Carotid Distensibility, Cohort Visit 1]			Waist-to-hip ratio [Cohort, Exam 1]																												Zinc [mg] [Nutrients, exam 2]
	CARIDX with adjudicated CEC [Cohort Surveillance CHD Occurrence Data Dictionary]	HRT8 [Carotid Distensibility, Cohort Visit 1]			[Smoking]. Do you now smoke a pipe? Q50 [Health/Medical History, exam 2]																												Folate [Micrograms] [Nutrients, exam 2]
	[Second transfer]. Were any of the following drugs given during this hospitalization or at discharge? Antiplatelet agents (non-aspirin). Q31j [Hospital Abstraction Form]	CY7 [Carotid Distensibility, Cohort Visit 1]			[Medical care]. Has a doctor ever said you had any of the following: (read each disease name and code N if No or Never Tested). Q5. Diabetes (sugar in the blood). Q5D [Health/Medical History, exam 2]																												Dietary cholesterol [mg] [Nutrients, exam 2]
	[Second transfer]. Did the patient die? Q25f [Hospital Abstraction Form]	HRT6 [Carotid Distensibility, Cohort Visit 1]			Diabetes - lower cut point 126 [mg/dL] [Cohort, Exam 2]																												Sodium [mg] [Nutrients, exam 2]
	[Hospital information]. Date of hospital arrival l: year. Q12 [Cohort Stroke Abstraction Form]	HRT10 [Carotid Distensibility, Cohort Visit 1]			Glucose (mg Per dL) Dec Pt Req. Q7 [Clinical Chemistry Lab, exam 2]																												Copper [mg] [Nutrients, exam 2]
	Follow up days for STRC12 (DATE OF HOSPITAL ARRIVAL) from exam 1	Number of acceptable CYcles [Carotid Distensibility, Cohort Visit 1]			LINTSHAD: shadow present Y-N [Ultrasound Raw Data, exam 1]																												Vitamin D [IU] [Nutrients, exam 2]
	Incident/fatal 28 days type tor In_07s [FATCHD, F_MI, N_MI, SMI, Missing]	HRT7 [Carotid Distensibility, Cohort Visit 1]			Plaque/shadowing (both, 1 w/o other, neither) in the left internal carotid [Cohort, Exam 1]																												Protein [g] [Nutrients, exam 2]
	Incident Source: myocardial infarction , fatal coronary heart disease or SMI	MeanHRT [Carotid Distensibility, Cohort Visit 1]			LINTPLAQ: plaque present Y-N [Ultrasound Raw Data, exam 1]																												Fructose [g] [Nutrients, exam 2]
	Incident/fatal 28 days type for Inc_by07	HRT12 [Carotid Distensibility, Cohort Visit 1]			Visit 2, diabetes [Cohort, Exam 2]																												Animal fat [g] [Nutrients, exam 2]
	[Information from death index/certificate]. 3rd death certificate ICD-10 code. Q19c [Death Certificate Form, DTH]	Stop point [Carotid Distensibility, Cohort Visit 1]			Hemoglobin g/dL (MAV). Q2 [Hematology Form, exam 2]																												Energy [Kcal] [Nutrients, exam 2]
	Incident Source: myocardial infarction or fatal coronary heart disease	CY8 [Carotid Distensibility, Cohort Visit 1]			Hematocrit % (MAV). Q1 [Hematology Form, exam 2]																												Thiamine [mg] [Nutrients, exam 2]
	[Second transfer]. Holter monitoring. Pacemaker (temporary, wires). Coronary stent. Q29p1 [Hospital Abstraction Form]	HRT11 [Carotid Distensibility, Cohort Visit 1]			CHMX07 [Clinical Chemistry Lab, exam 1]																												Vegetable fat [g] [Nutrients, exam 2]
	Health Interview Form present 0-No, 1-Yes	First min [Carotid Distensibility, Cohort Visit 1]			Recalibrated glucose in SI units [Cohort, Exam 1]																												Manganese [mg] [Nutrients, exam 2]
	Oral anticoagulants	Start point [Carotid Distensibility, Cohort Visit 1]			Depth, left common carotid: posterior angle [Ultrasound Derived Data, exam 1]																												Crude fiber [g] [Nutrients, exam 2]
	[Second transfer]. What was the primary diagnosis or reason for admission to this hospital? Q24a [Hospital Abstraction Form]	Diastolic blood pressure [BP] 1 [Carotid Distensibility, Cohort Visit 1]			Depth, right bifurcation [Ultrasound Derived Data, exam 1]																												Calcium [mg] [Nutrients, exam 2]
	[Additional forms to be filled our]. DTHQ15=d Q59 [Cohort Stroke Abstraction Form]	CY9 [Carotid Distensibility, Cohort Visit 1]			Triglyceride (run). Q2b [Lipid Lab, exam 2]																												Iron [mg] [Nutrients, exam 2]
	[Hospital information]. Date of discharge or death: year. Q14 [Cohort Stroke Abstraction Form]	DDDC10 [Carotid Distensibility, Cohort Visit 1]			Cholesterol (run). Q1b [Lipid Lab, exam 2]																												Alpha-tocopherol [mg] [Nutrients, exam 2]
	Follow up days for STRC14 (DATE OF DISCHARGE OR DEATH) from exam 1	EP [Carotid Distensibility, Cohort Visit 1]			Plaque in either carotid bifurcation [Cohort, Exam 2]																												Vitamin C [mg] [Nutrients, exam 2]
	[Additional forms to be filled our]. Abstractor number. Date abstracted: year. Q57 [Cohort Stroke Abstraction Form]	Systolic blood pressure [BP] 1 [Carotid Distensibility, Cohort Visit 1]			Plaque(with and W/O shadowing)-Alt. Def. [Cohort, Exam 2]																												[Miscellaneous]. In the past year, how often on average did you consume... Fruit-flavored punch or non-carbonated beverages, such as lemonade, Kool-Aid or Hawaiian Punch; not diet; 1 glass. Q65 [Dietary Intake Form, exam 2]
	[Physician documentation of new symptoms or signs present on or leading to this admission, or occurring during hospitalization]. Coma, unconsciousness, stupor occurring within 12 hours after onset of the neurologic event. Q35a [Cohort Stroke Abstraction Form]	DDDC11 [Carotid Distensibility, Cohort Visit 1]			Plaque/shadowing in any left site [Cohort, Exam 2]																												[Vegetables]. In the past year, how often on average did you consume... Carrots; 1 whole or 1/2 c. cooked. Q18 [Dietary Intake Form, exam 2]
	[Hospital information]. Did new neurological symptoms/signs develop during this hospitalization? Date of onset of current neurological event: year. Q21 [Cohort Stroke Abstraction Form]	Compliance [Carotid Distensibility, Cohort Visit 1]			Plaque/shadowing in any right site [Cohort, Exam 2]																												[Meat]. In the past year, how often on average did you consume... Eggs; 1. Q38 [Dietary Intake Form, exam 2]
	Follow up days for STRC21 (DATE OF ONSET NEUROLOGIC EVENT) from exam 1	Mean diastolic blood pressure [BP] [Carotid Distensibility, Cohort Visit 1]			Plaque/shadowing in any site [Cohort, Exam 2]																												[Meats]. In the past year, how often on average did you consume... Eggs; 1. Q38 [Dietary Intake Form (DTIC), exam 3]
	[Biomarkers: day two]. Day two	Mean systolic blood pressure [BP] [Carotid Distensibility, Cohort Visit 1]			Plaque/shadowing in either bifurcation [Cohort, Exam 2]																												[Fruits]. In the past year, how often on average did you consume... Bananas; 1. Q13 [Dietary Intake Form (DTIC), exam 3]
	[Information from death index/certificate]. 4th death certificate ICD-10 code. Q19d [Death Certificate Form, DTH]	First arm diastolic blood pressure [Ankle Brachial BP (Blood Pressure - ultrasound work station), exam 4]			Plaque/shadowing in either internal [Cohort, Exam 2]																												[Meat]. In the past year, how often on average did you consume... Beef, pork, or lamb as a sandwich or mixed dish, stew, casserole, lasagna, or in spaghetti sauce, etc. Q32 [Dietary Intake Form, exam 2]
	[Chest pain on effort]. How soon? Q9 [Medical History Form, exam 1]	First arm systolic blood pressure [Ankle Brachial BP (Blood Pressure - ultrasound work station), exam 4]			Plaque/shadowing in the left internal [Cohort, Exam 2]																												[Fruits]. In the past year, how often on average did you consume... Orange or grapefruit juice; small glass. Q11 [Dietary Intake Form (DTIC), exam 3]
	[Laboratory tests performed this admission]. Date of first CT scan: year. Q49c [Cohort Stroke Abstraction Form]	Second arm diastolic blood pressure [Ankle Brachial BP (Blood Pressure - ultrasound work station), exam 4]			Plaque in either internal carotid [Cohort, Exam 2]																												[Meats]. In the past year, how often on average did you consume... Other fish such as cod, perch, catfish, etc.; 3-5 oz. Q36 [Dietary Intake Form (DTIC), exam 3]
	Follow up days for STRC49C (DATE OF CT SCAN) from exam 1	Second arm systolic blood pressure [Ankle Brachial BP (Blood Pressure - ultrasound work station), exam 4]			Shadowing in either internal carotid [Cohort, Exam 2]																												[Meat]. In the past year, how often on average did you consume... Beef, pork, or lamb as a main dish, steak, roast, ham, etc. Q33 [Dietary Intake Form, exam 2]
	Date of death for an event-days from exam 1 [Cohort Surveillance CHD Occurrence Data Dictionary]	Sitting diastolic blood pressure [Ankle Brachial BP (Blood Pressure - ultrasound work station), exam 4]			Plaque/shadowing in the right internal [Cohort, Exam 2]																												[Other dietary items]. How often do you eat liver; 3-4 oz. serving? Q66 [Dietary Intake Form (DTIC), exam 3]
	[Chest pain on effort]. Will you show me where it was? Sternum (upper or middle) Q10a [Medical History Form, exam 1]	Sitting systolic blood pressure [Ankle Brachial BP (Blood Pressure - ultrasound work station), exam 4]			Plaque/shadowing in left bifurcation [Cohort, Exam 2]																												[Fruits]. In the past year, how often on average did you consume... Fresh apples or pears; 1. Q9 [Dietary Intake Form (DTIC), exam 3]
	[Possible infraction]. Doctor diagnosis of Q25 chest pain. Q27 [Medical History Form, exam 1]	First standing diastolic blood pressure [Ankle Brachial BP (Blood Pressure - ultrasound work station), exam 4]			Plaque/shadowing in right bifurcation [Cohort, Exam 2]																												[Other dietary items]. How often do you eat liver; 3-4 oz. serving. Q66 [Dietary Intake Form, exam 2]
	[Hospital information]. History of myocardial infarction prior to the onset of this event. Q28 [Cohort Stroke Abstraction Form]	First standing systolic blood pressure [Ankle Brachial BP (Blood Pressure - ultrasound work station), exam 4]			HDL cholesterol (run). Q3b [Lipid Lab, exam 2]																												[Meats]. In the past year, how often on average did you consume... Dark meat fish, such as salmon, mackerel, swordfish, sardines, bluefish; 3-5 oz. Q35 [Dietary Intake Form (DTIC), exam 3]
	[Laboratory tests performed this admission]. Was B-mode and/or Doppler ultrasound on carotid(s) performed? Date: year. Q53b [Cohort Stroke Abstraction Form]	Second standing diastolic blood pressure [Ankle Brachial BP (Blood Pressure - ultrasound work station), exam 4]			Overall average depth variable in pixels [Ultrasound Derived Data, exam 2]																												[Fruits]. In the past year, how often on average did you consume... Carrots; 1 whole or 1/2 c. cooked. Q18 [Dietary Intake Form (DTIC), exam 3]
	Follow up days for STRC53B (DATE OF ULTRASOUND) from exam 1	Second standing systolic blood pressure [Ankle Brachial BP (Blood Pressure - ultrasound work station), exam 4]			Overall average depth variable in mm [Ultrasound Derived Data, exam 2]
	[Information from death index/certificate]. Is the code E10-E14, I10, I11, I20-I25, I46-I51, I70, I97 (exclude I97.2), J81, J96, R96, R98, or R99? Q14b [Cohort Event Eligibility Form, CELB]	Third arm systolic blood pressure [Ankle Brachial BP (Blood Pressure - ultrasound work station), exam 4]			Depth, left bifurcation [Ultrasound Derived Data, exam 1]
	FATCHD by 2007	Third arm diastolic blood pressure [Ankle Brachial BP (Blood Pressure - ultrasound work station), exam 4]			10 year stroke risk score at visit 1 [Cohort, Exam 1]
	[Biomarkers: day one]. Day one	First arm diastolic blood pressure [Ankle Brachial BP (Blood Pressure - ultrasound work station), exam 3]			ApoA-I (run). Q1b [Apolipoprotein A-I in Plasma by Radioimmunoassay, Cohort exam 2]
	[Information from death index/certificate]. 5th death certificate ICD-10 code. Q19e [Death Certificate Form, DTH]	First arm systolic blood pressure [Ankle Brachial BP (Blood Pressure - ultrasound work station), exam 3]			ApoB (run). Q2b [Apolipoprotein A-I in Plasma by Radioimmunoassay, Cohort exam 2]
	[Laboratory tests performed this admission]. What was approximate time between symptom onset and the MRI? (If &gt; 1 MRI, pick the most meaningful.). Date: year. Q52c [Cohort Stroke Abstraction Form]	Second arm systolic blood pressure [Ankle Brachial BP (Blood Pressure - ultrasound work station), exam 3]			RINTSHAD: shadow present Y-N [Ultrasound Raw Data, exam 1]
	Follow up days for STRC52C (DATE OF MRI) from exam 1	Second arm diastolic blood pressure [Ankle Brachial BP (Blood Pressure - ultrasound work station), exam 3]			RINTPLAQ: plaque present Y-N [Ultrasound Raw Data, exam 1]
	[Biomarkers: day two]. Day two	Sitting diastolic blood pressure [Ankle Brachial BP (Blood Pressure - ultrasound work station), exam 3]			HDL(3) cholesterol (run). Q4b [Lipid Lab, exam 2]
	Def/Prob Hemorrhagic Inc. Stroke by 2007	Sitting systolic blood pressure [Ankle Brachial BP (Blood Pressure - ultrasound work station), exam 3]			Depth variable (right common carotid: anterior angle) [Ultrasound Derived Data, exam 2]
	Diagnostic Q-wave present from adjudicated data [Cohort, Exam 2]	Ankle diastolic blood pressure [Ankle Brachial BP (Blood Pressure - ultrasound work station), exam 3]			Predicted 10 year risk of incident ischemic stroke (visit 2) [Cohort, Exam 2]
	[Biomarkers: day one]. Day one	Ankle systolic blood pressure [Ankle Brachial BP Index, exam 3]			Depth, left internal carotid [Ultrasound Derived Data, exam 1]
	Rose possible myocardial infarction [Cohort, Exam 1]	First standing diastolic blood pressure [Ankle Brachial BP (Blood Pressure - ultrasound work station), exam 3]			Depth variable (left common carotid: optimal angle) [Ultrasound Derived Data, exam 2] [Ultrasound Derived Data, exam 2]
	[Hospital information]. Discharged alive or dead ? Q15 [Cohort Stroke Abstraction Form]	First standing systolic blood pressure [Ankle Brachial BP (Blood Pressure - ultrasound work station), exam 3]			[Interview]. Were any of the medications you took during the past two weeks for: diabetes or high blood sugar? Q8f [Medication Survey Form, exam 1]
	Incident atrial flutter event as determined by hospital discharge codes on the cohort eligibility form (CEL) or at cohort visits 2, 3, or 4	Second standing diastolic blood pressure [Ankle Brachial BP (Blood Pressure - ultrasound work station), exam 3]			Depth variable (left bifurcation focus-far wall) [Ultrasound Derived Data, exam 2]
	Rose angina [Cohort, Exam 1]	Second standing systolic blood pressure [Ankle Brachial BP (Blood Pressure - ultrasound work station), exam 3]			Depth variable (right bifurcation focus-far wall) [Ultrasound Derived Data, exam 2]
		Third arm systolic blood pressure [Ankle Brachial BP (Blood Pressure - ultrasound work station), exam 3]			10 year of coronary heart disease [CHD] risk score at visit 1 [Cohort, Exam 1]
		Third arm diastolic blood pressure [Ankle Brachial BP (Blood Pressure - ultrasound work station), exam 3]			10 year incident risk score for coronary heart disease [CHD] at visit 2 [Cohort, Exam 2]
		[Second transfer]. Is there a history of hypertension (high blood pressure) prior to this event? Q38 [Hospital Abstraction Form]			Depth variable (right bifurcation) [Ultrasound Derived Data, exam 2]
		Diastolic blood pressure 8 [Cohort (Jackson only), Exam 3]			Plaque in either common carotid artery [Cohort, Exam 3]
		Systolic blood pressure 7 [Cohort (Jackson only), Exam 3]			Plaque with or without shadowing - alternate definition [Cohort, Exam 3]
		Palpated systolic BP			Plaque in either carotid bifurcation [Cohort, Exam 3]
		Max inflation level (PLPSYS20 + 30)			Shadowing in either internal carotid artery [Cohort, Exam 3]
		Blood pressure &gt;= 140/90 mmHg OR current TX w/ anti-HTN meds			Plaque in either internal carotid artery [Cohort, Exam 3]
		Seated systolic BP- second reading			Shadowing in either carotid bifurcation [Cohort, Exam 3]
		Seated systolic BP- first reading			Shadowing in either internal carotid artery [Cohort, Exam 3]
		Seated diastolic BP- second reading			Plaque/shadowing in any left carotid site [Cohort, Exam 3]
		Seated Diastolic Blood Pressure			Plaque/shadowing in any right carotid site [Cohort, Exam 3]
		Any diuretic			Same leg ankle blood pressure at visit 1 and visit 3 [Ankle Brachial BP Index, exam 3]
		Beta blockers			Plaque/shadow in either common carotid [Cohort, Exam 3]
		Seated systolic BP- third reading			Plaque/shadowing in any carotid site [Cohort, Exam 3]
		Seated diastolic BP- third reading			Leg for ankle blood pressure at visit 3 (definition 1) [Ankle Brachial BP Index, exam 3]
		Any hypertension meds			Plaque with or without shadowing [Cohort, Exam 3]
		Seated Systolic Blood Pressure			Plaque/shadowing in left common carotid [Cohort, Exam 3]
		Self-reported hypertension			Plaque/shadowing in right internal carotid [Cohort, Exam 3]
		Redefined supine brachial systolic blood pressure [Ankle Brachial BP Index, exam 3]			Plaque/shadowing in left internal carotid [Cohort, Exam 3]
		Seated diastolic BP- first reading			Plaque/shadowing in right carotid bifurcation [Cohort, Exam 3]
		[Preliminary measurement]. Pulse obliteration pressure. Q9 [Sitting Blood Pressure, exam 2]			Plaque/shadowing in left carotid bifurcation [Cohort, Exam 3]
		1st Ankle systolic blood pressure reading [Ankle Brachial BP (Blood Pressure - ultrasound work station), exam 1]			Ankle brachial index measured at visit 3 [Ankle Brachial BP Index, exam 3]
		Redefined supine brachial systolic blood pressure [Ankle Brachial BP Index, exam 4]			Ankle Brachial Index measurement status at visit 3 [Cohort, Exam 3]
		Ankle diastolic blood pressure [Ankle Brachial BP (Blood Pressure - ultrasound work station), exam 4]			Plaque/shadowing in right common carotid [Cohort, Exam 3]
		Thiazide diuretics w/o k-sparing			[Preliminary measurements]. Right arm circumference (cm). Q6 [Sitting Blood Pressure, exam 3]
		Thiazide diuretics with k-sparing			[Preliminary measurements]. Cuff size. Q7 [Sitting Blood Pressure, exam 3]
					[Preliminary measurements]. Maximum zero. Q11 [Sitting Blood Pressure, exam 3]
					[Height and weight]. Standing height (to the nearest cm, rounding down). Q1 [Anthropometry Form, ANTC, exam 3]
					Body Mass Index in kg/m**2 [Cohort, Exam 3]
					[Body size].Hip girth (to the nearest cm, rounding down). Q3b [Anthropometry Form, ANTC, exam 3]
					[Height and weight]. Weight (to the nearest lb, rounding down). Q2 [Anthropometry Form, ANTC, exam 3]
					[Body size]. Waist girth (to the nearest cm, rounding down). Q3a [Anthropometry Form, ANTC, exam 3]
					Waist-to-hip ratio [Cohort, Exam 3]
					Diabetes using lower cut point 126 [mg/dL] [Cohort, Exam 3]
					Diabetes using lower cut point 140 [mg/dL] [Cohort, Exam 3]
					Glucose (value in mg/dL) Q4a [Lipid Lab, exam 3]
					Has a doctor ever told you that you had sugar diabetes? Q2a [Retinal Examination Form, exam 3]
					Depth, right internal carotid [Ultrasound Derived Data, exam 1]
					Depth variable (left internal carotid) [Ultrasound Derived Data, exam 2]
					Depth variable (left bifurcation) [Ultrasound Derived Data, exam 2]
					Visit 2, blood glucose in mmol/L [Cohort, Exam 2]
					Average far wall width (right common carotid: anterior angle) [Ultrasound Derived Data, exam 2]
					[Interview]. Were any of the medications you took during the past two weeks for: diabetes or high blood sugar. Q24F [Medication Survey Form, exam 2]
					9 year diabetes risk score at visit 1 [Cohort, Exam 1]
					Depth variable (right internal carotid) [Ultrasound Derived Data, exam 2]
					[Sudden loss or changes of speech]. Had any sudden loss or changes in speech? Q3 [TIA/Stroke, exam 1]
					[Administrative information]. Method of data collection. Q48 [TIA/Stroke, exam 1]
					[Sudden paralysis or weakness]. Had sudden episodes of paralysis or weakness on one side of body? Q32 [TIA/Stroke, exam 1]
					Average far wall width, left common carotid: optimal angle [Ultrasound Derived Data, exam 1]
					Total combined family income for the past 12 months. Q62 [Home Interview, exam 1]
					[Occupation]. Please look at this card. Which of these income groups represents your total combined family income for the past 12 months? Include income from all sources such as wages, salaries, social security or retirement benefits, help from relatives, rent from property, and so forth. Please tell me the letter only. Q60 [Personal History Form, exam 3]
					Average far wall width (left common carotid: optimal angle) [Ultrasound Derived Data, exam 2] [Ultrasound Derived Data, exam 2]
					Average far wall width, right common carotid: optimal angle [Ultrasound Derived Data, exam 1]
					Depth variable (left common carotid: anterior angle) [Ultrasound Derived Data, exam 2]
					Depth variable(right common carotid: anterior angle) [Ultrasound Derived Data, exam 2]
					Depth variable(right common carotid: posterior angle)
					Predicted 10 year risk of incident ischemic stroke [Cohort, Exam 3]
					Average far wall width, right common carotid: posterior angle [Ultrasound Derived Data, exam 1]
					Depth variable (left common carotid: posterior angle) [Ultrasound Derived Data, exam 2]
					Neutrophil Bands % Q6 [Hematology Form, exam 1]
					[Interview]. Were any of the medications you took during the past two weeks for: diabetes or high blood sugar. Q24g [Medication Survey Form, exam 3]
					Ankle Brachial Index measured at visit 4 [Ankle Brachial BP Index, exam 4]
					Same leg-ankle blood pressure at visit 1 and visit 4 [Ankle Brachial BP Index, exam 4]
					Leg for ankle blood pressure at visit 4 (definition 1) [Ankle Brachial BP Index, exam 4]
					Sex (From FTRA22) [Cohort, Exam 4]
					Race (from FTRA23) [Cohort, Exam 4]
					[Preliminary measurement]. Right arm circumference (cm). Q6 [Sitting Blood Pressure, exam 4]
					[Preliminary measurement]. Maximum zero. Q11 [Sitting Blood Pressure, exam 4]
					[Preliminary measurement]. Cuff size. Q7 [Sitting Blood Pressure, exam 4]
					[Height and weight]. Hip girth (to the nearest cm, rounding down). Q3b [Anthropometry Form, ANTD, exam 4]
					[Body size]. Waist girth (to the nearest cm, rounding down). Q3a [Anthropometry Form, ANTD, exam 4]
					Waist-to-hip ratio [Cohort, Exam 4]
					[Height and weight]. Weight (to the nearest lb, rounding down). Q2 [Anthropometry Form, ANTD, exam 4]
					[Height and weight]. Standing height (to the nearest cm, rounding down). Q1 [Anthropometry Form, ANTD, exam 4]
					Body Mass Index in Kg/M**2 [Cohort, Exam 4]
					Diabetes using lower cut point 126 Mg/dL [Cohort, Exam 4]
					Fasting glucose (run). Q4b [Lipid Lab, exam 4]
					Visit 4, fasting glucose in SI units [Cohort, Exam 4]
					Fasting glucose (value). Q4a [Lipid Lab, exam 4]
					Insulin (run). Q7b [Lipid Lab, exam 4]
					[Smoking]. Please tell me if you have ever used the following? Pipe/cigars/cigarillos. Q12a [Personal History form, exam 4]
					[Medical care]. Has a doctor ever said you had any of the following? Diabetes (sugar in the blood). Q6c [Personal History form, exam 4]
					Diabetes using lower cut point 140 Mg/dL [Cohort, Exam 4]
					[Administrative information]. Code number of person completing this form. Q23 [Personal History form, exam 4]
					Triglyceride (run). Q2b [Lipid Lab, exam 4]
					Code number. Q29 [Medical History Questionnaire, exam 4]
					[Medical care]. Please tell me if you usually go to one or more of the following sources of medical care when you want help with a health problem. By a 'health problem' I mean an illness, a medical question or concern, or a need for a test or treatment. Regular clinic. Q1d [Personal History form, exam 4]
					Predicted 10 year risk of incident coronary heart disease (CHD) [Cohort, Exam 3]
					Average far wall width (right bifurcation focus-far wall) [Ultrasound Derived Data, exam 2]
					Maximum far wall width (right bifurcation focus-far wall) [Ultrasound Derived Data, exam 2]
					Total correct symbols (CNFC, Part B). Q2 [Cognitive Function Form, exam 4]
					[Administrative information]. Method of data collection. Q22 [Personal History form, exam 4]
					Average far wall width (left bifurcation focus-far wall) [Ultrasound Derived Data, exam 2]
					[Participant]. Please look at this card. Which of these income groups represents your total combined family income for the past 12 months? Include income from all sources such as wages, salaries, social security or retirement benefits, help from relatives, rent from property, and so forth. Please tell me the letter only. Q6 [Socioeconomic Status, exam 4]
					Total correct symbols (CNFA, Q2.). Q2 [Cognitive Function Form, CNF, exam 2]
					Average far wall width (right common carotid: posterior angle) [Ultrasound Derived Data, exam 2]
					Predicted 9 year risk of incident type two diabetes [Cohort, Exam 2]
					Average far wall width, left common carotid: posterior angle [Ultrasound Derived Data, exam 1]
					[Interview]. Were any of the medications you took during the past two weeks for: diabetes or high blood sugar. Q24g [Medication Survey Form, exam 4]
					Average far wall width (left common carotid: anterior angle) [Ultrasound Derived Data, exam 2]
					Average far wall width, left common carotid: anterior angle [Ultrasound Derived Data, exam 1]
					Average far wall width (right common carotid: anterior angle) [Ultrasound Derived Data, exam 2]
					Average far wall width, right common carotid: anterior angle [Ultrasound Derived Data, exam 1]
					Maximum far wall width (right common carotid: anterior angle) [Ultrasound Derived Data, exam 2]
					Maximum far wall width (right common carotid: posterior angle) [Ultrasound Derived Data, exam 2]
					Maximum far wall width, right common carotid: optimal angle [Ultrasound Derived Data, exam 1]
					Maximum far wall width, right common carotid: posterior angle [Ultrasound Derived Data, exam 1]
					Average far wall width (left common carotid: posterior angle) [Ultrasound Derived Data, exam 2]
					Predicted 10 year risk of incident coronary heart disease (CHD) [Cohort, Exam 4]
					Was participant treated for diabetes in visit 3? Q1 [Oral Glucose Tolerance Screening Version B, exam 4]
					Average far wall width (right bifurcation) [Ultrasound Derived Data, exam 2]
					Maximum far wall width (right bifurcation) [Ultrasound Derived Data, exam 2]
					Maximum far wall width (left common carotid: anterior angle) [Ultrasound Derived Data, exam 2]
					Maximum far wall width (left common carotid: optimal angle) [Ultrasound Derived Data, exam 2]
					Do you regularly take medication to control diabetes (high blood sugar)? Q2 [Oral Glucose Tolerance Screening Version B, exam 4]
					Maximum far wall width, left common carotid: posterior angle [Ultrasound Derived Data, exam 1]
					Predicted 9 year risk of incident type two diabetes [Cohort, Exam 3]
					Average far wall width (left bifurcation) [Ultrasound Derived Data, exam 2]
					Maximum far wall width (left bifurcation) [Ultrasound Derived Data, exam 2]
					Average near wall width (right bifurcation focus-near wall) [Ultrasound Derived Data, exam 2]
					Average near wall width (left bifurcation focus-near wall) [Ultrasound Derived Data, exam 2]
					Maximum far wall width (left common carotid: posterior angle) [Ultrasound Derived Data, exam 2]
					Maximum far wall width, left common carotid: anterior angle [Ultrasound Derived Data, exam 1]
					Average far wall width, right bifurcation [Ultrasound Derived Data, exam 1]
					Maximum far wall width, right bifurcation [Ultrasound Derived Data, exam 1]
					Visit 4 , two hour glucose in SI units [Cohort, Exam 4]
					Two-hour glucose (value). Q5a [Lipid Lab, exam 4]
					Average far wall width, left bifurcation [Ultrasound Derived Data, exam 1]
					Maximum far wall width, left bifurcation [Ultrasound Derived Data, exam 1]
					Two-hour glucose (run). Q5b [Lipid Lab, exam 4]
					Maximum far wall width, right common carotid: anterior angle [Ultrasound Derived Data, exam 1]
					Maximum far wall width (left bifurcation focus-far wall)
					Predicted 9 year risk of incident type two diabetes [Cohort, Exam 4]
					Average far wall width (left internal carotid) [Ultrasound Derived Data, exam 2]
					Maximum far wall width (left internal carotid) [Ultrasound Derived Data, exam 2]
					Average far wall width (right internal carotid) [Ultrasound Derived Data, exam 2]
					Maximum far wall width (right internal carotid) [Ultrasound Derived Data, exam 2]
					Scan date: year [Ultrasound Raw Data, exam 3]
					Scan date: year [Ultrasound Raw Data, exam 3]
					Scan date: year [Ultrasound Raw Data, exam 3]
					Plaque/shadowing in either carotid bifurcation [Cohort, Exam 3]
					Scan date [Ultrasound Raw Data, exam 3]
					Loptrdat: reading date: year [Ultrasound Raw Data, exam 3]
					Loptles : lesion present (reader impres) [Ultrasound Raw Data, exam 3]
					Loptshad: shadow present Y-N [Ultrasound Raw Data, exam 3]
					Loptcalf: calibration factor X.Xxxx [Ultrasound Raw Data, exam 3]
					Scan date: year [Ultrasound Raw Data, exam 3]
					Plaque/shadowing in either internal carotid [Cohort, Exam 3]
					Roptrdat: reading date: year [Ultrasound Raw Data, exam 3]
					Roptshad: shadow present Y-N [Ultrasound Raw Data, exam 3]
					Roptles : lesion present (reader impres) [Ultrasound Raw Data, exam 3]
					Roptcalf: calibration factor X.Xxxx [Ultrasound Raw Data, exam 3]
					Rbnwrdat: reading date: year [Ultrasound Raw Data, exam 3]
					Rbnwcalf: calibration factor X.Xxxx [Ultrasound Raw Data, exam 3]
					Rbifrdat: reading date: year [Ultrasound Raw Data, exam 3]
					Rbifles : lesion present (reader impres) [Ultrasound Raw Data, exam 3]
					Rbifshad: shadow present Y-N [Ultrasound Raw Data, exam 3]
					Rbifcalf: calibration factor X.Xxxx [Ultrasound Raw Data, exam 3]
					Lbifrdat: reading date: year [Ultrasound Raw Data, exam 3]
					Lbifshad: shadow present Y-N [Ultrasound Raw Data, exam 3]
					Lbifles : lesion present (reader impres) [Ultrasound Raw Data, exam 3]
					Lbifcalf: calibration factor X.Xxxx [Ultrasound Raw Data, exam 3]
					Lbnwrdat: reading date: year [Ultrasound Raw Data, exam 3]
					Lbnwcalf: calibration factor X.Xxxx [Ultrasound Raw Data, exam 3]
					Lbnwles : lesion present (reader impres) [Ultrasound Raw Data, exam 3]
					Lbfwrdat: reading date: year [Ultrasound Raw Data, exam 3]
					Sonographer code [Ultrasound Raw Data, exam 3]
					Lbfwles : lesion present (reader impres) [Ultrasound Raw Data, exam 3]
					Lbfwcalf: calibration factor X.Xxxx [Ultrasound Raw Data, exam 3]
					Rbfwrdat: reading date: year [Ultrasound Raw Data, exam 3]
					Rbfwcalf: calibration factor X.Xxxx [Ultrasound Raw Data, exam 3]
					Rbfwles : lesion present (reader impres) [Ultrasound Raw Data, exam 3]
					Sonographer code [Ultrasound Raw Data, exam 3]
					Sonographer code [Ultrasound Raw Data, exam 3]
					Sonographer code [Ultrasound Raw Data, exam 3]
					Rbfwshad: shadow present Y-N [Ultrasound Raw Data, exam 3]
					Predicted 10 year risk of incident ischemic stroke [Cohort, Exam 4]
					Lbfwshad: shadow present Y-N [Ultrasound Raw Data, exam 3]
					Sonographer code [Ultrasound Raw Data, exam 3]
					Lintrdat: reading date: year [Ultrasound Raw Data, exam 3]
					Lintles : lesion present (reader impres) [Ultrasound Raw Data, exam 3]
					Lintshad: shadow present Y-N [Ultrasound Raw Data, exam 3]
					Lintcalf: calibration factor X.Xxxx [Ultrasound Raw Data, exam 3]
					Eosinophils %. Q9 [Hematology Form, exam 2]
					Rintrdat: reading date: year [Ultrasound Raw Data, exam 3]
					Rintshad: shadow present Y-N [Ultrasound Raw Data, exam 3]
					Rintles : lesion present (reader impres) [Ultrasound Raw Data, exam 3]
					Rintcalf: calibration factor X.Xxxx [Ultrasound Raw Data, exam 3]
					Average near wall width (right bifurcation) [Ultrasound Derived Data, exam 2]
					Maximum near wall width (right bifurcation) [Ultrasound Derived Data, exam 2]
					Average near wall width (left bifurcation) [Ultrasound Derived Data, exam 2]
					Maximum near wall width (left bifurcation) [Ultrasound Derived Data, exam 2]
					Plaque/shadowing in any left carotid site [Cohort, Exam 4]
					Alternate definition plaque in any site [Cohort, Exam 4]
					Plaque/shadowing in any right carotid site [Cohort, Exam 4]
					Plaque/shadowing in any carotid site [Cohort, Exam 4]
					Plaque/shadowing in either common [Cohort, Exam 4]
					Plaque/shadowing in either bifurcation [Cohort, Exam 4]
					Plaque/shadowing in either internal [Cohort, Exam 4]
					Plaque/shadowing in left internal carotid [Cohort, Exam 4]
					Plaque in either internal carotid [Cohort, Exam 4]
					Shadowing in either internal carotid [Cohort, Exam 4]
					Plaque/shadowing in left bifurcation [Cohort, Exam 4]
					Plaque/shadowing in the left common [Cohort, Exam 4]
					Plaque/shadowing in right carotid bifurcation [Cohort, Exam 4]
					Plaque in either common carotid [Cohort, Exam 4]
					Plaque/shadowing in right common carotid [Cohort, Exam 4]
					[Administrative information]. Code number of person completing this form. Q22 [Health/Medical History, exam 4]
					First arm time [Ankle Brachial BP (Blood Pressure - ultrasound work station), exam 4]
					Second arm time [Ankle Brachial BP (Blood Pressure - ultrasound work station), exam 4]
					Average near wall width, right bifurcation [Ultrasound Derived Data, exam 1]
					Maximum near wall width, right bifurcation [Ultrasound Derived Data, exam 1]
					Sitting time [Ankle Brachial BP (Blood Pressure - ultrasound work station), exam 4]
					First standing time [Ankle Brachial BP (Blood Pressure - ultrasound work station), exam 4]
					Second standing time [Ankle Brachial BP (Blood Pressure - ultrasound work station), exam 4]
					Third arm time [Ankle Brachial BP (Blood Pressure - ultrasound work station), exam 4]
					Ankle time [Ankle Brachial BP (Blood Pressure - ultrasound work station), exam 4]
					PAD41 [peripheral artery disease, version 4 (definition 1)] [Ankle Brachial BP Index, exam 4]
					PAD42 [peripheral artery disease, visit 4 (definition 2) , Ankle Brachial Index &lt;.9 for both genders] [Ankle Brachial BP Index, exam 4]
					Average near wall width, left bifurcation [Ultrasound Derived Data, exam 1]
					Maximum lumen diameter, left bifurcation [Ultrasound Derived Data, exam 1]
					Average far wall width, right internal carotid [Ultrasound Derived Data, exam 1]
					Maximum far wall width, right internal carotid [Ultrasound Derived Data, exam 1]
					Average artery diameter, right popliteal [Ultrasound Derived Data, exam 1]
					Maximum far wall width, left internal carotid [Ultrasound Derived Data, exam 1]
					Average far wall width, left internal carotid [Ultrasound Derived Data, exam 1]
					Maximum near wall width (right bifurcation focus-near wall) [Ultrasound Derived Data, exam 2]
					Maximum near wall width (left bifurcation focus-near wall) [Ultrasound Derived Data, exam 2]
					Hematocrit. Q5 [Hematology Lab, exam 4]
					Hemoglobin. Q4 [Hematology Lab, exam 4]
					Average far wall width (right common carotid: anterior angle) [Ultrasound Derived Data, exam 4]
					Maximum far wall width (right common carotid: anterior angle) [Ultrasound Derived Data, exam 4]
					Red blood count. Q3 [Hematology Lab, exam 4]
					Scan date: year [Ultrasound Raw Data, exam 3]
					Qc01rdat: reading date: year [Ultrasound Raw Data, exam 3]
					Incident peripheral artery disease at visit 4 [Ankle Brachial BP Index, exam 4]
					Qc01calf: calibration factor X.Xxxx [Ultrasound Raw Data, exam 3]
					Average artery diameter, left popliteal [Ultrasound Derived Data, exam 1]
					Average far wall width (left common carotid: optimal angle) [Ultrasound Derived Data, exam 4]
					Maximum far wall width (left common carotid: optimal angle) [Ultrasound Derived Data, exam 4]
					Sonographer code [Ultrasound Raw Data, exam 3]
					Average far wall width (right bifurcation focus-far wall) [Ultrasound Derived Data, exam 4]
					Maximum far wall width (right bifurcation focus-far wall) [Ultrasound Derived Data, exam 4]
					Average far wall width (left bifurcation focus-far wall) [Ultrasound Derived Data, exam 4]
					Average near wall width (left common carotid: optimal angle) [Ultrasound Derived Data, exam 4]
					Maximum near wall width (left common carotid: optimal angle) [Ultrasound Derived Data, exam 4]
					Average near wall width (left internal carotid) [Ultrasound Derived Data, exam 2]
					Maximum near wall width (left internal carotid) [Ultrasound Derived Data, exam 2]
					Peripheral artery disease, visit 3 (definition 1) [Ankle Brachial BP Index, exam 3]
					Average far wall width (right bifurcation) [Ultrasound Derived Data, exam 4]
					Maximum far wall width (right bifurcation) [Ultrasound Derived Data, exam 4]
					Peripheral artery disease, version 3 (definition 2), Ankle Brachial Index &lt;.9 for both genders [Ankle Brachial BP Index, exam 3]
					Incident peripheral artery disease at visit 3 [Ankle Brachial BP Index, exam 3]
					Average near wall width (right bifurcation focus-near wall) [Ultrasound Derived Data, exam 4]
					Average far wall width (left bifurcation) [Ultrasound Derived Data, exam 4]
					Maximum far wall width (left bifurcation) [Ultrasound Derived Data, exam 4]
					Maximum near wall width (left bifurcation focus-near wall) [Ultrasound Derived Data, exam 4]
					Average near wall width (left bifurcation focus-near wall) [Ultrasound Derived Data, exam 4]
					Maximum far wall width (left bifurcation focus-far wall) [Ultrasound Derived Data, exam 4]
					Minimum lumen diameter, right popliteal [Ultrasound Derived Data, exam 1]
					Incident peripheral artery disease at visit 3 or visit 4 [Ankle Brachial BP Index, exam 4]
					Average far wall width (right internal carotid) [Ultrasound Derived Data, exam 4]
					Maximum far wall width (right internal carotid) [Ultrasound Derived Data, exam 4]
					Maximum far wall width (left internal carotid) [Ultrasound Derived Data, exam 4]
					Average far wall width (left internal carotid) [Ultrasound Derived Data, exam 4]
					Average near wall width, left internal carotid [Ultrasound Derived Data, exam 1]
					Maximum near wall width, left internal carotid [Ultrasound Derived Data, exam 1]
					Average near wall width (right internal carotid) [Ultrasound Derived Data, exam 2]
					Maximum near wall width (right internal carotid) [Ultrasound Derived Data, exam 2]
					[Second transfer]. Does this patient have diabetes (high blood sugar), either history or diagnosed this hospitalization? Q38b [Hospital Abstraction Form]
					Hematocrit. Q5 [Hematology Lab, exam 3]
					Red blood count. Q3 [Hematology Lab, exam 3]
					Hemoglobin. Q4 [Hematology Lab, exam 3]
					Minimum lumen diameter, left popliteal [Ultrasound Derived Data, exam 1]
					[Medication records]. Medication code No. Q4ab [Medication Survey Form, exam 1]
					Average near wall width (right bifurcation) [Ultrasound Derived Data, exam 4]
					Maximum near wall width (right bifurcation) [Ultrasound Derived Data, exam 4]
					Average near wall width (left bifurcation) [Ultrasound Derived Data, exam 4]
					Maximum near wall width (left bifurcation) [Ultrasound Derived Data, exam 4]
					Weighted mean of the DA45 variables [Ultrasound Imputed Values, white females, exam 3]
					Z Score summary stat. for the DA45 vars [Ultrasound Imputed Values, white females, exam 3]
					Derived average far wall thickness, right internal carotid [Ultrasound Imputed Values, white females, exam 3]
					Mean of the DA45 variables [Ultrasound Imputed Values, white females, exam 3]
					Imputed RTA [the reader trend adjusted] far wall thickness, RBIC [right bifurcation] [Reader-trend-adjusted ultrasound, white females, exam 3]
					Imputed RTA [the reader trend adjusted] far wall thickness, LBIC [left bifurcation] [Reader-trend-adjusted ultrasound, white females, exam 3]
					Mean of the RT45 variables [Reader-trend-adjusted ultrasound, white females, exam 4]
					Imputed RTA [the reader trend adjusted] far wall thickness, RBID [right bifurcation] [Reader-trend-adjusted ultrasound, white females, exam 4]
					Imputed RTA [the reader trend adjusted] far wall thickness, RIND [right internal carotid] [Reader-trend-adjusted ultrasound, white females, exam 4]
					Imputed RTA [the reader trend adjusted] far wall thickness, LINC [left internal carotid] [Reader-trend-adjusted ultrasound, white females, exam 4]
					Average near wall width, right internal carotid [Ultrasound Derived Data, exam 1]
					Maximum near wall width, right internal carotid [Ultrasound Derived Data, exam 1]
					Plaque/shadowing (both, 1 w/o other, neither) in the right internal carotid [Cohort, Exam 1]
					Maximum near wall width (right bifurcation focus-near wall) [Ultrasound Derived Data, exam 4]
					Average far wall width (first QC repeat scan) [Ultrasound Derived Data, exam 4]
					[Medication records]. Medication Code No. Q4bb [Medication Survey Form, exam 1]
					Maximum near wall width (left internal carotid) [Ultrasound Derived Data, exam 4]
					Average near wall width (left internal carotid) [Ultrasound Derived Data, exam 4]
					Derived average far wall thickness, right bifurcation [Ultrasound Imputed Values, white males, exam 3]
					1=scan date &gt;=15May87, 0= scan date&lt;15May87 [Ultrasound Imputed Values, black females, exam 1]
					Derived average far wall thickness, left bifurcation [Ultrasound Imputed Values, white males, exam 3]
					Calculated body surface area 6 [Cohort (Jackson only), Exam 3]
					Maximum far wall width (first QC repeat scan) [Ultrasound Derived Data, exam 4]
					Weighted mean of the DA45 variables [Ultrasound Imputed Values, black females, exam 1]
					Z-score summary statistic for the DA45 variables [Ultrasound Imputed Values, black females, exam 1]
					Derived average far wall thickness, left common carotid: optimal angle [Ultrasound Imputed Values, black females, exam 1]
					Mean of the DA45 variables [Ultrasound Imputed Values, black females, exam 1]
					Derived average far wall thickness, right bifurcation [Ultrasound Imputed Values, black females, exam 1]
					Derived average far wall thickness, right common carotid: optimal angle [Ultrasound Imputed Values, black females, exam 1]
					Derived average far wall thickness, right internal carotid [Ultrasound Imputed Values, black females, exam 1]
					Mean of the RT45 variables [Reader-trend-adjusted ultrasound, black females, exam 1]
					Imputed RTA [the reader trend adjusted] far wall thickness, LBIA [left bifurcation] [Reader-trend-adjusted ultrasound, black females, exam 1]
					Imputed RTA [the reader trend adjusted] far wall thickness, ROPA [right common carotid: optimal angle] [Reader-trend-adjusted ultrasound, black females, exam 1]
					Derived average far wall thickness, left bifurcation [Ultrasound Imputed Values, black females, exam 1]
					Imputed RTA [the reader trend adjusted] far wall thickness, LOPA [left common carotid: optimal angle] [Reader-trend-adjusted ultrasound, black females, exam 1]
					Imputed RTA [the reader trend adjusted] far wall thickness, LINA [left internal carotid] [Reader-trend-adjusted ultrasound, black females, exam 1]
					Derived average far wall thickness, left internal carotid [Ultrasound Imputed Values, black females, exam 1]
					1 = if scandate on or after May 15, 1987; 0= if scandate before May 15, 1987 [1=scandate&gt;=15may87, 0=scandate&lt;15may87] [Reader-trend-adjusted ultrasound, black females, exam 1]
					[Hospital information]. Race or ethnic group. Q10 [Cohort Stroke Abstraction Form]
					[Hospital information]. Gender. Q9 [Cohort Stroke Abstraction Form]
					Total correct symbols. Q2 [Cognitive Function Form, exam 3]
					[Other dietary items]. Type of diet diabetic. Q83e [Dietary Intake Form (DTIC), exam 3]
					Imputed RTA [the reader trend adjusted] far wall thickness, LBID [left bifurcation] [Reader-trend-adjusted ultrasound, white females, exam 4]
					Average near wall width (right internal carotid) [Ultrasound Derived Data, exam 4]
					Maximum near wall width (right internal carotid) [Ultrasound Derived Data, exam 4]
					Forced vital capacity (Liters)
					BMI = weight/((height/100)*(height/100))
					Forced expiratory volume in one second (Liters)
					Weight in kilograms
					[Medication records]. Medication code No. Q4cb [Medication Survey Form, exam 1]
					Neck circumference in centimeters
					Height in centimeters
					Time of arrival - hour
					Time of departure - hour
					Cuff Size
					Weight in kilograms
					Waist measurement in centimeters
					Hip measurement in centimeters
					Weight for LOPART45 [Reader-trend-adjusted ultrasound, black females, exam 2]
					Imputed R/T adjusted av45, shifted, RIN [right internal carotid] [Reader-trend-shift-adjusted ultrasound, black females, exam 2]
					Mean of the JS45 Variables [Reader-trend-shift-adjusted ultrasound, black females, exam 2]
					1 = if scandate on or after May 15, 1987; 0=if scandate before May 15, 1987 [1=scandate&gt;=15may87, 0=scandate&lt;15may87] [Reader-trend-adjusted ultrasound, black females, exam 2]
					Weight for LBIART45 [Reader-trend-adjusted ultrasound, black females, exam 2]
					Weight for RBIART45 [Reader-trend-adjusted ultrasound, black females, exam 2]
					Mean of the DA45 variables [Ultrasound Imputed Values, black females, exam 2]
					Weighted mean of the DA45 variables [Ultrasound Imputed Values, black females, exam 2]
					Derived average far wall thickness, right bifurcation [Ultrasound Imputed Values, black females, exam 2]
					Derived average far wall thickness, left bifurcation [Ultrasound Imputed Values, black females, exam 2]
					Z-score summary statistic for the DA45 variables [Ultrasound Imputed Values, black females, exam 2]
					Derived average far wall thickness, right Internal carotid [Ultrasound Imputed Values, black females, exam 2]
					Derived average far wall thickness, left internal carotid [Ultrasound Imputed Values, black females, exam 2]
					Derived average far wall thickness, left common carotid: optimal angle [Ultrasound Imputed Values, black females, exam 2]
					Derived average far wall thickness, right common carotid: optimal angle [Ultrasound Imputed Values, black females, exam 2]
					Adverse Event Form present 0-No, 1-Yes
					[Temperature]. Room temperature in Celsius Q1 [Sitting Blood Pressure, exam 4]
					Maximum far wall width, left common carotid: optimal angle [Ultrasound Derived Data, exam 1]
					Do you now smoke a pipe? Q39 [Home Interview, exam 1]
					Weight for LINART45 [Reader-trend-adjusted ultrasound, black females, exam 2]
					[Medication records]. Transcriber code number. Q7 [Medication Survey Form, exam 1]
					Insulin
					Weighted mean of the DA45 variables [Ultrasound Imputed Values, black females, exam 3]
					Z-score summary statistic for the DA45 variables [Ultrasound Imputed Values, black females, exam 3]
					Mean of the DA45 variables [Ultrasound Imputed Values, black females, exam 3]
					Derived average far wall thickness, left bifurcation [Ultrasound Imputed Values, black females, exam 3]
					Derived average far wall thickness, left internal carotid [Ultrasound Imputed Values, black females, exam 3]
					Derived average far wall thickness, right bifurcation [Ultrasound Imputed Values, black females, exam 3]
					Imputed R/T Adjusted av45, shifted, LBI [left bifurcation] [Reader-trend-shift-adjusted ultrasound, black females, exam 3]
					Imputed R/T adjusted av45, shifted, LOP [left common carotid: optimal angle] [Reader-trend-shift-adjusted ultrasound, black females, exam 3]
					Imputed R/T adjusted av45, shifted, RIN [right internal carotid] [Reader-trend-shift-adjusted ultrasound, black females, exam 3]
					Mean of the JS45 variables [Reader-trend-shift-adjusted ultrasound, black females, exam 3]
					Imputed R/T adjusted av45, shifted, ROP [right common carotid: optimal angle] [Reader-trend-shift-adjusted ultrasound, black females, exam 3]
					Imputed R/T Adjusted av45, shifted, LIN [left internal carotid] [Reader-trend-shift-adjusted ultrasound, black females, exam 3]
					Derived Average Far Wall Thickness, Right Internal Carotid [Ultrasound Imputed Values, black females, exam 3]
					Imputed RTA [the reader trend adjusted] far wall thickness, RINC [right internal carotid] [Reader-trend-adjusted ultrasound, black females, exam 3]
					Imputed R/T adjusted av45, shifted, RBI [right bifurcation] [Reader-trend-shift-adjusted ultrasound, black females, exam 3]
					Derived average far wall thickness, left common carotid: optimal angle [Ultrasound Imputed Values, black females, exam 3]
					Derived average far wall thickness, right common carotid: optimal angle [Ultrasound Imputed Values, black females, exam 3]
					Mean of the RT45 variables [Reader-trend-adjusted ultrasound, black females, exam 3]
					Imputed RTA [the reader trend adjusted] far wall thickness, LINC [left internal carotid] [Reader-trend-adjusted ultrasound, black females, exam 3]
					Imputed RTA [the reader trend adjusted] far wall thickness, RBIC [right bifurcation] [Reader-trend-adjusted ultrasound, black females, exam 3]
					Imputed RTA [the reader trend adjusted] far wall thickness, ROPC [right common carotid: optimal angle] [Reader-trend-adjusted ultrasound, black females, exam 3]
					Imputed R/T adjusted av45, shifted, LOP [left common carotid: optimal angle] [Reader-trend-shift-adjusted ultrasound, black females, exam 2]
					Imputed RTA [the reader trend adjusted] far wall thickness, LOPC [left common carotid: optimal angle] [Reader-trend-adjusted ultrasound, black females, exam 3]
					[Medication records]. Medication code No. Q4db [Medication Survey Form, exam 1]
					[Reception]. Get medication information later? Q3 [Medication Survey Form, exam 1]
					Ankle brachial index, visit 3 (definition 4) [Ankle Brachial BP Index, exam 3]
					Was participant treated for diabetes in visit 3? Q1 [Oral Glucose Tolerance Screening Form, exam 4]
					Has your doctor ever told you that you had diabetes? Q2A [Retinal Examination Form, exam 4]
					[Other dietary items]. I am going to ask you about wine, beer, and drinks made with hard liquor because these are the three major types of alcoholic beverages. Do you presently drink alcoholic beverages? Q90 [Dietary Intake Form, exam 2]
					Do you regularly take medication to control diabetes? Q2 [Oral Glucose Tolerance Screening Form, exam 4]
					STRATUM [Hemostasis Lab, exam 3]
					Diabetic change status [Hemostasis Lab, exam 3]
					[Medication records]. Medication code No. Q4eb [Medication Survey Form, exam 1]
					Number of times electrode replaced for left EOG
					[Sudden loss of vision]. During the (worst) episode, which of the following parts of your vision were affected? Q15 [TIA/Stroke, exam 1]
					Average far wall width (QC scan 02) [Ultrasound Derived Data, exam 4]
					Maximum far wall width (QC scan 02) [Ultrasound Derived Data, exam 4]
					Weighted mean of the DA45 variables [Ultrasound Imputed Values, black females, exam 4]
					Derived average far wall thickness, right internal carotid [Ultrasound Imputed Values, black females, exam 4]
					Derived average far wall thickness, right bifurcation [Ultrasound Imputed Values, black females, exam 4]
					Imputed RTA [the reader trend adjusted] far wall thickness, LIND [left internal carotid] [Reader-trend-adjusted ultrasound, black females, exam 4]
					Derived Average far wall thickness, left internal carotid [Ultrasound Imputed Values, black females, exam 4]
					Derived average far wall thickness, left bifurcation [Ultrasound Imputed Values, black females, exam 4]
					Mean of the DA45 variables [Ultrasound Imputed Values, black females, exam 4]
					Mean of the RT45 variables [Reader-trend-adjusted ultrasound, black females, exam 4]
					Mean of the JS45 variables [Reader-trend-shift-adjusted ultrasound, black females, exam 4]
					Derived average far wall thickness, right common carotid: optimal angle [Ultrasound Imputed Values, black females, exam 4]
					Derived average far wall thickness, left common carotid: optimal angle [Ultrasound Imputed Values, black females, exam 4]
					Z-score summary stat. for DA45 vars [Ultrasound Imputed Values, black females, exam 4]
					Imputed RTA [the reader trend adjusted] far wall thickness, RIND [right internal carotid] [Reader-trend-adjusted ultrasound, black females, exam 4]
					Imputed RTA [the reader trend adjusted] far wall thickness, RBID [right bifurcation] [Reader-trend-adjusted ultrasound, black females, exam 4]
					Imputed RTA [the reader trend adjusted] far wall thickness, LBID [left bifurcation] [Reader-trend-adjusted ultrasound, black females, exam 4]
					Imputed RTA [the reader trend adjusted] far wall thickness, ROPD [right common carotid: optimal angle] [Reader-trend-adjusted ultrasound, black females, exam 4]
					[Medication records]. Medication code No. Q4fb [Medication Survey Form, exam 1]
					RINTALRT: alert value 1=present, 0=not [Ultrasound Raw Data, exam 1]
					Imputed R/T adjusted av45, shifted, LBI [left bifurcation] [Reader-trend-shift-adjusted ultrasound, black females, exam 4]
					Number of times electrode replaced for right EOG
					Oral hypoglycemic
					Imputed RTA [the reader trend adjusted] far wall thickness, LBIC [left bifurcation] [Reader-trend-adjusted ultrasound, black females, exam 3]
					Plaque (with or without shadowing) [Cohort, Exam 2]
					Insulin in SI Units [Cohort, Exam 1]
					Imputed RTA [the reader trend adjusted] far wall thickness, LOPD [left common carotid: optimal angle] [Reader-trend-adjusted ultrasound, black females, exam 4]
					Mean of the RT45 variables [Reader-trend-adjusted ultrasound, black females, exam 2]
					Number of times electrode replaced for EMG
					Weight for RINART45 [Reader-trend-adjusted ultrasound, black females, exam 2]
					Plaque in either carotid bifurcation [Cohort, Exam 1]
					Imputed RTA [the reader trend adjusted] far wall thickness, RINA [right internal carotid] [Reader-trend-adjusted ultrasound, black females, exam 1]
					Imputed R/T adjusted av45, shifted, ROP [right common carotid: optimal angle] [Reader-trend-shift-adjusted ultrasound, black females, exam 4]
					Imputed RTA [the reader trend adjusted] far wall thickness, ROPD [right common carotid: optimal angle] [Reader-trend-adjusted ultrasound, white females, exam 4]
					Imputed RTA [the reader trend adjusted] far wall thickness, LOPC [left common carotid: optimal angle] [Reader-trend-adjusted ultrasound, white females, exam 4]
					Plaque in either carotid bifurcation [Cohort, Exam 4]
					Imputed RTA [the reader trend adjusted] far wall thickness, RBIA [right bifurcation] [Reader-trend-adjusted ultrasound, black females, exam 1]
					Maximum far wall width (right common carotid: anterior angle) [Ultrasound Derived Data, exam 2]
					Plaque in any site [Cohort, Exam 4]
					Acceptability code detail, 2nd best test [Pulmonary Function Test, exam 1]
					Ankle Brachial Index, visit 4 (definition 4) [Ankle Brachial BP Index, exam 4]
					Optical disk for permanent archive [Cohort (Jackson only), Exam 3]
					Imputed R/T adjusted av45, shifted, LOP [left common carotid: optimal angle] [Reader-trend-shift-adjusted ultrasound, black females, exam 4]
					Plaque/shadowing in right internal carotid [Cohort, Exam 4]
					Additional key field [Ultrasound Raw Data, exam 1]
					[Administrative information]. Method of data collection. Q104 [Dietary Intake Form, exam 1]
					Same leg-ankle blood pressure at visit 3 and visit 4 [Ankle Brachial BP Index, exam 4]
[truncated: 370 more columns]
